# Supplementary material for: Design, synthesis via a one-pot approach and molecular docking studies of novel pyrrolo[2,1-a]isoquinoline derivatives
Source: Royal Society of Chemistry journal article supplement (doi:10.1039/d1nj04115k), 2021-12-14
Supplement: d1nj04115k1.pdf [file d1nj04115k1.pdf]

## Supporting Information

### Design, synthesis *via* one-pot approach and molecular docking studies of novel pyrrolo[2,1-*a*]isoquinoline derivatives

Dhruba Jyoti Boruah, †,‡ Devarajan Kathirvelan±, Satheesh Borra† Ram Awatar Maurya,\* †,‡ Panneerselvam Yuvaraj\* ‡,§

† Applied Organic Chemistry Group, Chemical Sciences & Technology Division, CSIR-North East Institute of Science & Technology (NEIST), Jorhat-785006, India

± Department of Chemistry, Indian Institute of Technology Hyderabad, India

‡ Academy of Scientific and Innovative Research (AcSIR), Ghaziabad 201002, India

§ CSIR-North East Institute of Science & Technology (NEIST), Branch Laboratory, Imphal-795004, Manipur, India

\*E-mail: [yuvaraj.orgchem@gmail.com](mailto:yuvaraj.orgchem@gmail.com)

\*E-mail: [ram.cdri@gmail.com](mailto:ram.cdri@gmail.com)

#### Table of Contents

|   |                                            |         |
|---|--------------------------------------------|---------|
| 1 | Materials and Methods                      | 2 - 3   |
| 2 | Spectral Data                              | 3 - 20  |
| 3 | Crystallographic data of product <b>4q</b> | 20 - 24 |
| 4 | Copies of NMR spectra                      | 25 - 53 |
| 5 | Copies of HRMS spectra                     | 54 - 68 |
| 6 | Docking Studies                            | 69 - 83 |

## EXPERIMENTAL SECTION

### 1. Materials and Methods

All the Pyrrolo[2,1-a]isoquinoline derivatives were prepared using isatins, 1,2,3,4-tetrahydroisoquinoline and chalcones under reflux conditions for 10 h. All the starting materials, chemical reagents and solvents except the chalcones were obtained from commercial sellers and used as such without any further purification. The progress of the reaction was monitored by thin-layer chromatography (TLC) performed on silica gel 60 F254 precoated aluminium sheets. TLC was visualised by a 254 nm UV lamp and iodine staining. The reaction products were purified through silica gel (230–400 mesh) column chromatography using ethyl acetate/hexane as eluent in increasing polarity. Melting points were recorded using melting point equipment and are uncorrected. NMR spectra were recorded using 500 MHz for  $^1\text{H}$  and 126 MHz for  $^{13}\text{C}$  using  $\text{CDCl}_3$  as a solvent. Tetramethylsilane (TMS) was used as internal standard (signal at 0 ppm) for  $^1\text{H}$  chemical shifts measurements, and coupling constants (J) are reported in hertz (Hz). High-resolution mass spectra (HRMS) were recorded on a Q-TOF mass spectrometer using positive electrospray ionisation ( $\text{ESI}^+$ ) for ion detection. The structural assignments of products were made by analysing their  $^1\text{H}/^{13}\text{C}$  NMR, HRMS spectra of a typical compound.

#### **Representative Procedure for the Synthesis of Chalcones:**

In a 50 mL round bottom flask, suitably substituted acetophenone (7.35 mmol) was dissolved in ethanol (10 mL). Then 6 mL of 10% NaOH solution was added to it and stirring the reaction mixture for 30 min at 0 °C. After that, substituted benzaldehydes were added to the reaction mixture and stirring was continued for 3-4 hrs. Next, the reaction mixture was concentrated under reduced pressure and extracted with ethyl acetate/water. The organic layer was dried over anhydrous sodium sulphate and concentrated in a vacuum to yield the crude product.

**Representative Procedure for the Synthesis of Pyrrolo[2,1-a]isoquinoline derivatives:** In a 50 mL round bottom flask, substituted isatin (0.5 mmol) was dissolved in toluene (5 mL) followed by the addition of 1,2,3,4-tetrahydroisoquinoline (0.5 mmol) and the mixture was stirred at room temperature for half an hour. After that, substituted chalcones (0.5 mmol) was added to the reaction mixture and stirring was continued at reflux condition for 10 hrs. Next, the reaction mixture was concentrated under reduced pressure and extracted with ethyl

acetate/water. The organic layer was dried over anhydrous sodium sulphate and concentrated in vacuum to yield the crude product which was purified by column chromatography using ethyl acetate/n-hexane (3:17) as eluent.

## 2. Spectral Data:

**(1'R,2'S,3R,10b'S)-2'-benzoyl-1'-phenyl-2',5',6',10b'-tetrahydro-1'H-spiro[indoline-3,3'-pyrrolo[2,1-a]isoquinolin]-2-one (4a):**

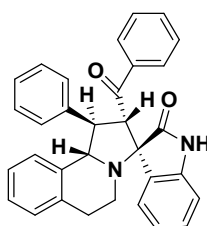

Prepared following the general procedure; pale yellow solid (0.204 g, 87%);  $R_f = 0.37$  (EtOAc/Hexane = 2/5); mp 205-206 °C;  $^1\text{H NMR}$  (500 MHz,  $\text{CDCl}_3$ )  $\delta$  7.73 (s, 1H), 7.71 – 7.66 (m, 2H), 7.46 – 7.32 (m, 4H), 7.32 – 7.20 (m, 2H), 7.14 – 7.10 (m, 2H), 7.10 – 7.04 (m, 3H), 6.98 – 6.90 (m, 2H), 6.86 (m, 1H), 6.70 (d,  $J = 7.8$  Hz, 1H), 6.46 (m, 1H), 5.21 (d,  $J = 10.1$  Hz, 1H), 4.58 (d,  $J = 9.5$  Hz, 1H), 4.34 (t,  $J = 9.8$  Hz, 1H), 2.97 – 2.90 (m, 2H), 2.72 – 2.66 (m, 1H), 2.63 – 2.56 (m, 1H).  $^{13}\text{C NMR}$  (126 MHz,  $\text{CDCl}_3$ )  $\delta$  196.69, 180.19, 141.86, 140.53, 137.91, 137.22, 134.49, 132.46, 129.02, 128.97, 128.94, 128.68, 127.91, 127.46, 127.31, 126.86, 126.67, 126.20, 125.39, 124.95, 122.95, 108.81, 70.86, 63.40, 63.26, 50.55, 42.22, 30.20; HRMS (ESI, Orbitrap) calcd for  $\text{C}_{32}\text{H}_{27}\text{N}_2\text{O}_2$   $[\text{M}+\text{H}]^+ = 471.2073$ , found = 471.2075 .

**(1'R,2'S,3R,10b'S)-2'-benzoyl-1'-(p-tolyl)-2',5',6',10b'-tetrahydro-1'H-spiro[indoline-3,3'-pyrrolo[2,1-a]isoquinolin]-2-one (4b):**

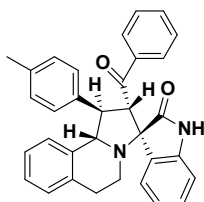

Prepared following the general procedure; pale yellow solid (0.211 g, 87%);  $R_f = 0.37$  (EtOAc/Hexane = 2/5); mp 229-230 °C;  $^1\text{H NMR}$  (500 MHz,  $\text{CDCl}_3$ )  $\delta$  7.67 (s, 1H), 7.57 (d,  $J = 7.9$  Hz, 2H), 7.42 – 7.37 (m, 2H), 7.25 (d,  $J = 7.2$  Hz, 1H), 7.19 (d,  $J = 7.8$  Hz, 2H), 7.13

– 7.09 (m, 3H), 7.08 – 7.04 (m, 2H), 6.97 – 6.97 (m, 2H), 6.84 – 6.82 (m, 1H), 6.74 (d,  $J = 7.8$  Hz, 1H), 6.45 (d,  $J = 7.7$  Hz, 1H), 5.17 (d,  $J = 10.1$  Hz, 1H), 4.56 (d,  $J = 9.5$  Hz, 1H), 4.30 (t,  $J = 9.8$  Hz, 1H), 3.01 – 2.88 (m, 2H), 2.73 – 2.54 (m, 2H), 2.35 (s, 3H).  $^{13}\text{C}$  NMR (126 MHz,  $\text{CDCl}_3$ )  $\delta$  196.90, 180.48, 140.67, 138.86, 138.15, 137.37, 136.50, 134.61, 132.56, 129.76, 129.12, 128.91, 128.78, 128.02, 127.59, 127.50, 126.78, 126.29, 125.51, 125.10, 123.06, 108.97, 70.99, 63.44, 63.39, 50.31, 42.36, 30.33, 21.18; HRMS (ESI, Orbitrap) calcd for  $\text{C}_{33}\text{H}_{29}\text{N}_2\text{O}_2$   $[\text{M}+\text{H}]^+ = 485.2229$ , found = 485.2241 .

**4-((1'R,2'S,3R,10b'S)-2'-(3-methoxybenzoyl)-2-oxo-2',5',6',10b'-tetrahydro-1'H-spiro[indoline-3,3'-pyrrolo[2,1-a]isoquinolin]-1'-yl)benzonitrile (4c):**

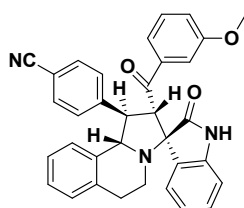

Prepared following the general procedure; white solid (0.223 g, 85%);  $R_f = 0.31$  (EtOAc/Hexane = 2/5); mp 217-218 °C;  $^1\text{H}$  NMR (500 MHz,  $\text{CDCl}_3$ )  $\delta$  7.84 – 7.79 (m, 2H), 7.73 – 7.68 (m, 2H), 7.58 (s, 1H), 7.15 – 7.07 (m, 2H), 7.07 – 7.01 (m, 2H), 6.98 – 6.93 (m, 3H), 6.90 – 6.81 (m, 3H), 6.54 (d,  $J = 7.8$  Hz, 1H), 6.50 (d,  $J = 7.7$  Hz, 1H), 5.22 (d,  $J = 9.9$  Hz, 1H), 4.46 (d,  $J = 9.5$  Hz, 1H), 4.38 (t,  $J = 9.7$  Hz, 1H), 3.67 (s, 3H), 3.00 – 2.89 (m, 2H), 2.73 – 2.56 (m, 2H).  $^{13}\text{C}$  NMR (126 MHz,  $\text{CDCl}_3$ )  $\delta$  196.27, 180.01, 159.42, 147.95, 140.78, 138.48, 137.35, 134.75, 133.02, 130.02, 129.51, 129.16, 127.08, 126.76, 126.72, 125.71, 124.76, 123.26, 120.10, 119.96, 118.98, 111.53, 111.07, 109.20, 71.03, 63.58, 63.51, 55.36, 50.76, 42.34, 30.27. (One peak is missing due to over lap); HRMS (ESI, Orbitrap) calcd for  $\text{C}_{34}\text{H}_{28}\text{N}_3\text{O}_3$   $[\text{M}+\text{H}]^+ = 526.2131$ , found = 526.2133.

**(1'R,2'S,3R,10b'S)-2'-benzoyl-1'-(4-chlorophenyl)-2',5',6',10b'-tetrahydro-1'H-spiro[indoline-3,3'-pyrrolo[2,1-a]isoquinolin]-2-one (4d):**

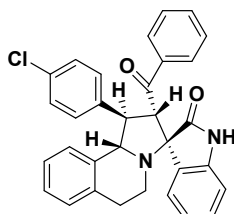



Prepared following the general procedure; yellow solid (0.217 g, 86%);  $R_f = 0.39$  (EtOAc/Hexane = 2/5); mp 235-236 °C;  $^1\text{H NMR}$  (500 MHz,  $\text{CDCl}_3$ )  $\delta$  7.77 (s, 1H), 7.65 – 7.60 (m, 2H), 7.42 – 7.34 (m, 4H), 7.30 – 7.24 (m, 1H), 7.14 – 7.10 (m, 3H), 7.09 – 7.03 (m, 2H), 6.99 – 6.92 (m, 2H), 6.87 – 6.84 (m, 1H), 6.68 (d,  $J = 7.8$  Hz, 1H), 6.46 (d,  $J = 7.6$  Hz, 1H), 5.17 (d,  $J = 10.1$  Hz, 1H), 4.50 (d,  $J = 9.4$  Hz, 1H), 4.31 (t,  $J = 9.8$  Hz, 1H), 3.00 – 2.87 (m, 2H), 2.73 – 2.54 (m, 2H).  $^{13}\text{C NMR}$  (126 MHz,  $\text{CDCl}_3$ )  $\delta$  196.53, 180.23, 140.55, 140.49, 137.59, 137.06, 134.49, 132.68, 132.63, 130.30, 129.15, 128.80, 127.99, 127.43, 127.09, 126.58, 126.36, 125.46, 124.78, 123.02, 108.94, 70.83, 63.29, 63.19, 49.93, 42.18, 30.15 (One peak is missing due to over lap); HRMS (ESI, Orbitrap) calcd for  $\text{C}_{32}\text{H}_{26}\text{N}_2\text{O}_2\text{Cl}[\text{M}+\text{H}]^+ = 505.1683$ , found = 505.1684.

**(1'R,2'S,3R,10b'S)-2'-(benzo[d][1,3]dioxole-5-carbonyl)-1'-(p-tolyl)-2',5',6',10b'-tetrahydro-1'H-spiro[indoline-3,3'-pyrrolo[2,1-a]isoquinolin]-2-one (4e):**

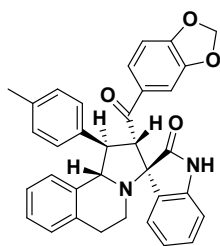

Prepared following the general procedure; white solid (0.229 g, 87%);  $R_f = 0.51$  (EtOAc/Hexane = 2/5); mp 181-182 °C;  $^1\text{H NMR}$  (500 MHz,  $\text{CDCl}_3$ )  $\delta$  7.53 (d,  $J = 8.0$  Hz, 2H), 7.40 (s, 1H), 7.18 (d,  $J = 7.8$  Hz, 2H), 7.12 – 7.05 (m, 3H), 7.04 – 6.99 (m, 1H), 6.94 – 6.85 (m, 3H), 6.72 (d,  $J = 7.8$  Hz, 1H), 6.53 (dd,  $J = 8.0, 1.7$  Hz, 2H), 5.87 (q,  $J = 1.4$  Hz, 2H), 5.14 (d,  $J = 10.1$  Hz, 2H), 4.44 (d,  $J = 9.4$  Hz, 1H), 4.27 (t,  $J = 9.8$  Hz, 1H), 2.93 (d,  $J = 8.0$  Hz, 1H), 2.67 (d,  $J = 11.5$  Hz, 1H), 2.64 – 2.54 (m, 2H), 2.34 (s, 3H).  $^{13}\text{C NMR}$  (126 MHz,  $\text{CDCl}_3$ )  $\delta$  194.58, 179.96, 151.17, 147.55, 140.42, 138.75, 138.03, 136.32, 134.46, 132.43, 129.60, 128.95, 128.75, 128.60, 127.45, 126.80, 126.11, 125.33, 124.96, 123.66, 122.96, 108.67, 107.34, 107.09, 101.48, 70.91, 63.26, 63.08, 50.41, 42.25, 30.21, 21.01; HRMS (ESI, Orbitrap) calcd for  $\text{C}_{34}\text{H}_{29}\text{N}_2\text{O}_4[\text{M}+\text{H}]^+ = 529.2127$ , found = 529.2128.

**(1'R,2'S,3R,10b'S)-2'-benzoyl-1'-(4-methoxyphenyl)-5-methyl-2',5',6',10b'-tetrahydro-1'H-spiro[indoline-3,3'-pyrrolo[2,1-a]isoquinolin]-2-one (4f):**

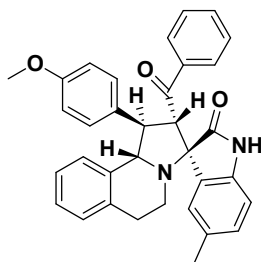

Prepared following the general procedure; off white solid (0.213 g, 83%);  $R_f = 0.44$  (EtOAc/Hexane = 2/5); mp 156-157 °C;  $^1\text{H NMR}$  (400 MHz,  $\text{CDCl}_3$ )  $\delta$  7.60 – 7.56 (m, 2H), 7.42 – 7.34 (m, 3H), 7.29 – 7.21 (m, 2H), 7.13 – 7.08 (m, 2H), 7.08 – 7.03 (m, 1H), 6.94 – 6.90 (m, 3H), 6.86 (s, 1H), 6.75 – 6.70 (m, 2H), 6.30 (d,  $J = 7.8$  Hz, 1H), 5.11 (d,  $J = 10.1$  Hz, 1H), 4.50 (d,  $J = 9.5$  Hz, 1H), 4.25 (t,  $J = 9.8$  Hz, 1H), 3.80 (s, 3H), 3.02 – 2.86 (m, 2H), 2.72 – 2.53 (m, 2H), 2.16 (s, 3H).  $^{13}\text{C NMR}$  (126 MHz,  $\text{CDCl}_3$ )  $\delta$  196.97, 180.13, 158.41, 138.07, 138.03, 137.46, 134.48, 133.87, 132.42, 132.32, 129.88, 129.22, 128.64, 127.86, 127.42, 127.36, 127.25, 126.13, 125.34, 124.93, 114.31, 108.45, 70.79, 63.29, 55.13, 49.77, 42.24, 30.20, 20.80. (One peak is missing due to overlap); HRMS (ESI, Orbitrap) calcd for  $\text{C}_{34}\text{H}_{31}\text{N}_2\text{O}_3$   $[\text{M}+\text{H}]^+ = 515.2335$ , found = 515.2333.

**(1'R,2'S,3R,10b'S)-2'-(benzo[d][1,3]dioxole-5-carbonyl)-5-methyl-1'-(p-tolyl)-2',5',6',10b'-tetrahydro-1'H-spiro[indoline-3,3'-pyrrolo[2,1-a]isoquinolin]-2-one (4g):**

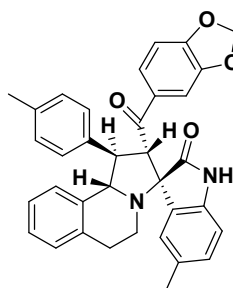

Prepared following the general procedure; pale yellow solid (0.231 g, 85%);  $R_f = 0.44$  (EtOAc/Hexane = 2/5); mp 207-208 °C;  $^1\text{H NMR}$  (500 MHz,  $\text{CDCl}_3$ )  $\delta$  7.58 (s, 1H), 7.53 (d,  $J = 8.0$  Hz, 2H), 7.17 (d,  $J = 7.8$  Hz, 2H), 7.10 – 6.98 (m, 3H), 6.89 (td,  $J = 7.6, 7.0, 1.8$  Hz, 3H), 6.79 (dd,  $J = 7.8, 1.8$  Hz, 1H), 6.71 (d,  $J = 7.8$  Hz, 1H), 6.51 (d,  $J = 8.2$  Hz, 1H), 6.41 (d,  $J = 7.9$  Hz, 1H), 5.91 – 5.79 (m, 2H), 5.12 (d,  $J = 10.1$  Hz, 1H), 4.42 (d,  $J = 9.4$  Hz, 1H), 4.25 (t,  $J = 9.7$  Hz, 1H), 3.01 – 2.86 (m, 2H), 2.74 – 2.53 (m, 2H), 2.33 (s, 3H), 2.18 (s, 3H).  $^{13}\text{C}$

NMR (126 MHz, CDCl<sub>3</sub>)  $\delta$  194.81, 180.31, 151.21, 147.65, 138.97, 138.22, 138.18, 136.41, 134.59, 132.68, 132.57, 129.71, 129.36, 128.88, 128.72, 127.58, 127.49, 126.22, 125.44, 125.08, 123.77, 108.58, 107.42, 107.21, 101.58, 71.13, 63.39, 63.21, 50.49, 42.41, 30.31, 21.14, 20.96; HRMS (ESI, Orbitrap) calcd for C<sub>35</sub>H<sub>31</sub>N<sub>2</sub>O<sub>4</sub> [M+H]<sup>+</sup> = 543.2284, found = 543.2289.

**(1'R,2'S,3R,10b'S)-2'-benzoyl-1'-(2-bromophenyl)-5-methyl-2',5',6',10b'-tetrahydro-1'H-spiro[indoline-3,3'-pyrrolo[2,1-a]isoquinolin]-2-one (4h):**

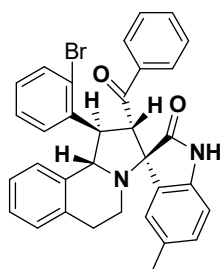

Prepared following the general procedure; pale yellow solid (0.225 g, 80%); R<sub>f</sub> = 0.31 (EtOAc/Hexane = 2/5); mp 211-212 °C; <sup>1</sup>H NMR (500 MHz, CDCl<sub>3</sub>)  $\delta$  8.05 (d, *J* = 7.9 Hz, 1H), 7.63 (dd, *J* = 8.0, 1.3 Hz, 2H), 7.47 – 7.40 (m, 3H), 7.29 – 7.24 (m, 1H), 7.13 (td, *J* = 7.9, 4.1 Hz, 4H), 7.07 (d, *J* = 7.5 Hz, 1H), 7.02 – 6.95 (m, 1H), 6.93 (d, *J* = 1.8 Hz, 1H), 6.75 (dd, *J* = 8.0, 1.8 Hz, 1H), 6.68 (d, *J* = 7.8 Hz, 1H), 6.36 (d, *J* = 7.9 Hz, 1H), 5.16 (d, *J* = 9.8 Hz, 1H), 5.01 (d, *J* = 11.2 Hz, 1H), 4.59 (s, 1H), 3.04 – 2.94 (m, 1H), 2.90 (td, *J* = 10.9, 3.7 Hz, 1H), 2.70 – 2.59 (m, 2H), 2.18 (s, 3H). <sup>13</sup>C NMR (126 MHz, CDCl<sub>3</sub>)  $\delta$  196.32, 180.21, 160.16, 142.97, 138.06, 137.32, 137.29, 134.28, 133.42, 132.59, 132.40, 130.14, 129.37, 128.67, 128.33, 128.22, 127.92, 127.55, 127.51, 126.82, 126.28, 125.59, 124.62, 108.53, 70.99, 65.39, 63.07, 48.13, 42.31, 30.13, 20.79; HRMS (ESI, Orbitrap) calcd for C<sub>33</sub>H<sub>28</sub>BrN<sub>2</sub>O<sub>2</sub> [M+H]<sup>+</sup> = 563.1334, found = 563.1335.

**(1'R,2'S,3R,10b'S)-2'-benzoyl-5-nitro-1'-(p-tolyl)-2',5',6',10b'-tetrahydro-1'H-spiro[indoline-3,3'-pyrrolo[2,1-a]isoquinolin]-2-one (4i):**

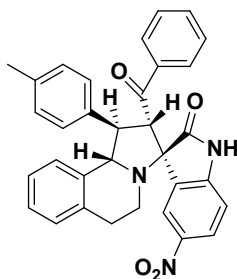

Prepared following the general procedure; pale yellow solid (0.212 g, 80%);  $R_f = 0.37$  (EtOAc/Hexane = 2/5); mp 220-221 °C;  $^1\text{H NMR}$  (500 MHz,  $\text{CDCl}_3$  &  $\text{DMSO-d}_6$ )  $\delta$  10.18 (br s, 1H), 7.89 (t,  $J = 5.9$  Hz, 2H), 7.55 (d,  $J = 7.8$  Hz, 2H), 7.39 (d,  $J = 7.7$  Hz, 2H), 7.29 (d,  $J = 10.7$  Hz, 1H), 7.20 (d,  $J = 7.6$  Hz, 2H), 7.17 – 7.09 (m, 3H), 7.07 (d,  $J = 7.3$  Hz, 1H), 6.94 (t,  $J = 7.5$  Hz, 1H), 6.73 (d,  $J = 7.8$  Hz, 1H), 6.55 (d,  $J = 8.4$  Hz, 1H), 5.16 (d,  $J = 10.2$  Hz, 1H), 4.55 (d,  $J = 9.4$  Hz, 1H), 4.32 (t,  $J = 9.7$  Hz, 1H), 2.96 (q,  $J = 12.1, 9.0$  Hz, 2H), 2.69 (d,  $J = 11.8$  Hz, 1H), 2.61 – 2.52 (m, 1H), 2.35 (s, 3H).  $^{13}\text{C NMR}$  (126 MHz,  $\text{CDCl}_3$  &  $\text{DMSO-d}_6$ )  $\delta$  196.20, 180.57, 147.83X2, 143.20, 138.32, 137.57, 137.04, 136.51, 134.10, 132.77, 129.66, 128.70, 128.62, 128.15, 127.35, 126.30, 125.84, 125.43, 124.83, 122.18, 108.97, 70.54, 63.32, 63.22, 50.11, 42.44, 30.05, 21.01; HRMS (ESI, Orbitrap) calcd for  $\text{C}_{33}\text{H}_{28}\text{N}_3\text{O}_4[\text{M}+\text{H}]^+ = 530.2080$ , found = 530.2064.

**(1'R,2'S,3R,10b'S)-2'-benzoyl-5-fluoro-1'-(p-tolyl)-2',5',6',10b'-tetrahydro-1'H-spiro[indoline-3,3'-pyrrolo[2,1-a]isoquinolin]-2-one (4j):**

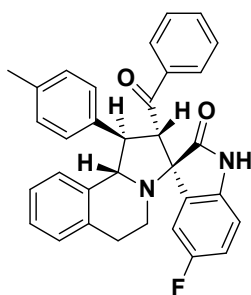

Prepared following the general procedure; pale yellow solid (0.211 g, 84%);  $R_f = 0.34$  (EtOAc/Hexane = 2/5); mp 255-256 °C;  $^1\text{H NMR}$  (500 MHz,  $\text{CDCl}_3$ )  $\delta$  7.90 (s, 1H), 7.59 – 7.51 (m, 2H), 7.45 – 7.38 (m, 2H), 7.30 – 7.25 (m, 1H), 7.18 (d,  $J = 7.9$  Hz, 2H), 7.13 (t,  $J = 7.8$  Hz, 2H), 7.10 – 7.04 (m, 2H), 6.93 (td,  $J = 7.4, 1.9$  Hz, 1H), 6.82 (dd,  $J = 8.0, 2.6$  Hz, 1H), 6.72 (d,  $J = 7.8$  Hz, 1H), 6.66 (td,  $J = 8.7, 2.7$  Hz, 1H), 6.39 (dd,  $J = 8.5, 4.1$  Hz, 1H), 5.15 (d,  $J = 10.1$  Hz, 1H), 4.55 (d,  $J = 9.5$  Hz, 1H), 4.27 (t,  $J = 9.8$  Hz, 1H), 3.02 – 2.84 (m, 2H), 2.69 (dd,  $J = 13.0, 7.6$  Hz, 1H), 2.61 – 2.50 (m, 1H), 2.34 (s, 3H).  $^{13}\text{C NMR}$  (126 MHz,  $\text{CDCl}_3$ )  $\delta$  196.62, 180.52, 160.25, 158.33, 138.61, 137.91, 137.30, 136.61, 136.59, 134.42, 132.75, 129.80, 129.47, 129.41, 128.86, 128.78, 128.16, 127.63, 126.38, 125.56, 125.05, 115.78, 115.59, 114.61, 114.41, 109.65, 109.59, 71.29, 71.27, 63.45, 63.39, 50.28, 42.45, 30.28, 21.15; HRMS (ESI, Orbitrap) calcd for  $\text{C}_{33}\text{H}_{28}\text{FN}_2\text{O}_2 [\text{M}+\text{H}]^+ = 503.2135$ , found = 503.2136.

**(1'R,2'S,3R,10b'S)-2'-benzoyl-5-chloro-1'-(p-tolyl)-2',5',6',10b'-tetrahydro-1'H-spiro[indoline-3,3'-pyrrolo[2,1-a]isoquinolin]-2-one (4k):**

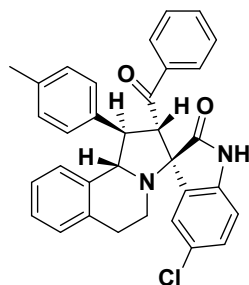

Prepared following the general procedure; white solid (0.215 g, 83%);  $R_f = 0.44$  (EtOAc/Hexane = 2/5); mp 138-139 °C;  $^1\text{H NMR}$  (500 MHz,  $\text{CDCl}_3$ )  $\delta$  7.80 – 7.74 (m, 2H), 7.65 (d,  $J = 2.2$  Hz, 1H), 7.50 – 7.46 (m, 1H), 7.37 – 7.32 (m, 2H), 7.24 (s, 1H), 7.20 (dd,  $J = 8.2, 2.2$  Hz, 1H), 7.07 (t,  $J = 7.9$  Hz, 3H), 7.04 – 6.96 (m, 3H), 6.82 (t,  $J = 7.5$  Hz, 1H), 6.67 (dd,  $J = 7.7, 1.4$  Hz, 1H), 6.58 (d,  $J = 8.2$  Hz, 1H), 5.80 (d,  $J = 8.4$  Hz, 1H), 5.19 (dd,  $J = 8.4, 6.7$  Hz, 1H), 4.08 (d,  $J = 6.8$  Hz, 1H), 3.25 – 3.15 (m, 1H), 2.78 (dd,  $J = 9.4, 3.2$  Hz, 2H), 2.72 – 2.62 (m, 1H), 2.24 (s, 3H).  $^{13}\text{C NMR}$  (126 MHz,  $\text{CDCl}_3$ )  $\delta$  202.28, 177.21, 139.78, 138.80, 137.20, 135.90, 134.62, 132.72, 132.38, 130.46, 129.22, 129.12, 128.98, 128.47, 128.42, 128.36, 128.11, 125.74, 125.65, 125.16, 125.07, 110.24, 63.83, 60.44, 51.31, 43.03, 30.02, 29.59, 20.95; HRMS (ESI, Orbitrap) calcd for  $\text{C}_{33}\text{H}_{28}\text{ClN}_2\text{O}_2$   $[\text{M}+\text{H}]^+ = 519.1839$ , found = 519.1845.

**(1'R,2'S,3R,10b'S)-2'-benzoyl-5-bromo-1'-(p-tolyl)-2',5',6',10b'-tetrahydro-1'H-spiro[indoline-3,3'-pyrrolo[2,1-a]isoquinolin]-2-one (4l):**

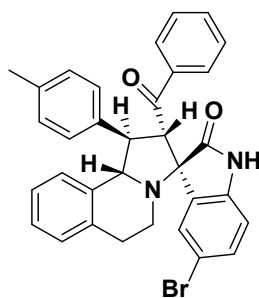

Prepared following the general procedure; pale yellow solid (0.228 g, 81%);  $R_f = 0.63$  (EtOAc/Hexane = 2/5); mp 155-156 °C;  $^1\text{H NMR}$  (500 MHz,  $\text{CDCl}_3$ )  $\delta$  7.63 (s, 1H), 7.55 (d,  $J = 7.7$  Hz, 2H), 7.41 (d,  $J = 7.7$  Hz, 2H), 7.27 (d,  $J = 12.3$  Hz, 1H), 7.22 – 7.18 (m, 3H), 7.15 (t,  $J = 7.6$  Hz, 2H), 7.11 – 7.07 (m, 3H), 6.93 (t,  $J = 7.5$  Hz, 1H), 6.73 (d,  $J = 7.8$  Hz, 1H), 6.31 (d,  $J = 8.2$  Hz, 1H), 5.14 (d,  $J = 10.1$  Hz, 1H), 4.54 (d,  $J = 9.4$  Hz, 1H), 4.27 (t,  $J = 9.8$

Hz, 1H), 3.04 – 2.88 (m, 2H), 2.72 – 2.65 (m, 1H), 2.63 – 2.54 (m, 1H), 2.35 (s, 3H). <sup>13</sup>C NMR (126 MHz, CDCl<sub>3</sub>) δ 196.52, 179.59, 139.46, 138.44, 137.73, 137.35, 136.49, 134.24, 132.54, 131.85, 129.68, 128.73, 128.64, 128.04, 127.47, 126.26, 125.42, 124.90, 115.64, 110.20, 70.78, 63.41, 63.34, 50.05, 42.36, 30.13, 21.02. (Two peak is missing due to over lap); HRMS (ESI, Orbitrap) calcd for C<sub>33</sub>H<sub>28</sub>BrN<sub>2</sub>O<sub>2</sub> [M+H]<sup>+</sup> = 563.1334, found = 563.1336.

**(1'R,2'S,3R,10b'S)-2'-benzoyl-5-iodo-1'-(p-tolyl)-2',5',6',10b'-tetrahydro-1'H-spiro[indoline-3,3'-pyrrolo[2,1-a]isoquinolin]-2-one (4m):**

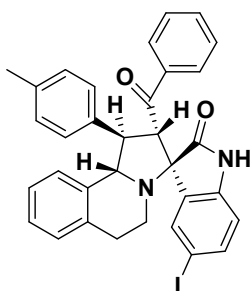

Prepared following the general procedure; pale yellow solid (0.253 g 83%); *R<sub>f</sub>* = 0.43 (EtOAc/Hexane = 2/5); mp 175-176 °C; <sup>1</sup>H NMR (500 MHz, CDCl<sub>3</sub>) δ 7.93 (br s, 1H), 7.77 – 7.72 (m, 2H), 7.54 (dd, *J* = 8.1, 1.8 Hz, 1H), 7.50 – 7.43 (m, 1H), 7.34 (t, *J* = 7.7 Hz, 2H), 7.14 (s, 1H), 7.05 (q, *J* = 6.9, 5.8 Hz, 3H), 6.98 (t, *J* = 9.5 Hz, 3H), 6.86 – 6.77 (m, 1H), 6.65 (d, *J* = 7.7 Hz, 1H), 6.43 (d, *J* = 8.1 Hz, 1H), 5.78 (d, *J* = 8.3 Hz, 1H), 5.18 (dd, *J* = 8.4, 6.7 Hz, 1H), 4.05 (d, *J* = 6.7 Hz, 1H), 3.19 (m, 1H), 2.76 (dd, *J* = 9.1, 2.7 Hz, 2H), 2.66 (d, *J* = 15.7 Hz, 1H), 2.23 (s, 3H). <sup>13</sup>C NMR (126 MHz, CDCl<sub>3</sub>) δ 202.55, 176.96, 141.15, 139.03, 138.25, 137.41, 136.14, 134.81, 133.66, 132.95, 132.56, 131.23, 129.36, 129.19, 128.69, 128.57, 128.30, 125.94, 125.84, 125.27, 111.43, 85.70, 64.05, 60.68, 51.37, 43.25, 30.21, 21.15; (one peak is missing due to over lap); HRMS (ESI, Orbitrap) calcd for C<sub>33</sub>H<sub>28</sub>IN<sub>2</sub>O<sub>2</sub> [M+H]<sup>+</sup> = 611.1195, found = 611.1198.

**(1'R,2'S,3R,10b'S)-2'-benzoyl-7-fluoro-1'-(p-tolyl)-2',5',6',10b'-tetrahydro-1'H-spiro[indoline-3,3'-pyrrolo[2,1-a]isoquinolin]-2-one (4n):**

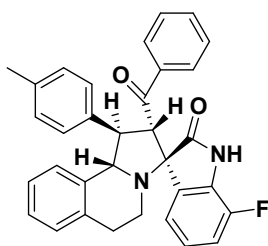

Prepared following the general procedure; pale yellow solid (0.176 g, 70%);  $R_f = 0.69$  (EtOAc/Hexane = 2/5); mp 197-198 °C;  $^1\text{H NMR}$  (500 MHz,  $\text{CDCl}_3$ )  $\delta$  7.69 (s, 1H), 7.57 – 7.54 (m, 2H), 7.41 – 7.37 (m, 2H), 7.32 – 7.28 (m, 1H), 7.19 (d,  $J = 7.8$  Hz, 2H), 7.17 – 7.11 (m, 2H), 7.11 – 7.05 (m, 2H), 6.95 – 6.92 (m, 1H), 6.86 (dd,  $J = 7.5, 1.2$  Hz, 1H), 6.81 – 6.79 (m, 1H), 6.76 – 6.70 (m, 2H), 5.17 (d,  $J = 10.1$  Hz, 1H), 4.56 (d,  $J = 9.5$  Hz, 1H), 4.28 (t,  $J = 9.8$  Hz, 1H), 3.01 – 2.88 (m, 2H), 2.74 – 2.64 (m, 1H), 2.63 – 2.55 (m, 1H), 2.35 (s, 3H).  $^{13}\text{C NMR}$  (126 MHz,  $\text{CDCl}_3$ )  $\delta$  196.45, 179.32, 146.95, 145.01, 138.48, 137.85, 137.12, 136.47, 134.33, 132.67, 130.16, 130.14, 129.67, 128.75, 128.63, 127.97, 127.74, 127.65, 127.38, 126.21, 125.42, 124.95, 123.47, 123.43, 122.29, 122.27, 115.95, 115.82, 71.12, 71.10, 63.50, 63.25, 50.15, 42.32, 30.15, 21.01; HRMS (ESI, Orbitrap) calcd for  $\text{C}_{33}\text{H}_{28}\text{FN}_2\text{O}_2$   $[\text{M}+\text{H}]^+ = 503.2135$ , found = 503.2130.

**(1'R,2'S,3R,10b'S)-2'-benzoyl-7-chloro-1'-(p-tolyl)-2',5',6',10b'-tetrahydro-1'H-spiro[indoline-3,3'-pyrrolo[2,1-a]isoquinolin]-2-one (4o):**

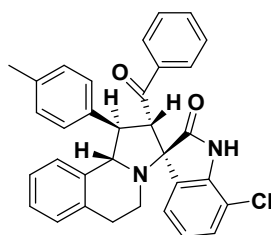

Prepared following the general procedure; pale yellow solid (0.181 g, 70%);  $R_f = 0.51$  (EtOAc/Hexane = 2/6); mp 233-234 °C;  $^1\text{H NMR}$  (500 MHz,  $\text{CDCl}_3$ )  $\delta$  7.57 – 7.52 (m, 2H), 7.51 (s, 1H), 7.40 – 7.34 (m, 2H), 7.34 – 7.27 (m, 1H), 7.20 (d,  $J = 7.8$  Hz, 2H), 7.19 – 7.12 (m, 2H), 7.14 – 7.04 (m, 2H), 6.82 – 6.79 (m, 3H), 6.81 (dd,  $J = 8.2, 7.4$  Hz, 1H), 6.73 (d,  $J = 7.8$  Hz, 1H), 5.16 (d,  $J = 10.1$  Hz, 1H), 4.54 (d,  $J = 9.5$  Hz, 1H), 4.27 (t,  $J = 9.8$  Hz, 1H), 3.02 – 2.89 (m, 2H), 2.69 (d,  $J = 11.5$  Hz, 1H), 2.64 – 2.56 (m, 1H), 2.35 (s, 3H).  $^{13}\text{C NMR}$  (126 MHz,  $\text{CDCl}_3$ )  $\delta$  196.69, 179.37, 138.62, 138.29, 138.02, 137.24, 136.70, 134.52, 132.92, 129.88, 129.28, 128.95, 128.85, 128.14, 127.53, 126.44, 125.63, 125.14, 125.01, 123.92, 114.25, 99.98, 71.60, 66.74, 64.61, 55.13, 44.71, 32.13, 21.87; HRMS (ESI, Orbitrap) calcd for  $\text{C}_{33}\text{H}_{28}\text{ClN}_2\text{O}_2$   $[\text{M}+\text{H}]^+ = 519.1839$ , found = 519.1843.

**(1'R,2'S,3R,10b'S)-2'-benzoyl-1'-methyl-1'-(naphthalen-2-yl)-2',5',6',10b'-tetrahydro-1'H-spiro[indoline-3,3'-pyrrolo[2,1-a]isoquinolin]-2-one (4p):**

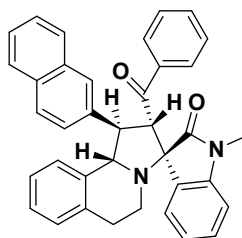

Prepared following the general procedure; pale yellow solid (0.213 g, 82%);  $R_f = 0.56$  (EtOAc/Hexane = 2/6); mp 221-222 °C;  $^1\text{H NMR}$  (500 MHz, Chloroform- $d$ )  $\delta$  8.11 (s, 1H), 7.91 (d,  $J = 1.2$  Hz, 2H), 7.89 – 7.86 (m, 1H), 7.85 – 7.82 (m, 1H), 7.50 – 7.42 (m, 2H), 7.27 – 7.21 (m, 3H), 7.11 (dd,  $J = 7.4, 1.3$  Hz, 1H), 7.09 – 7.03 (m, 4H), 7.03 – 7.00 (m, 1H), 6.92 – 6.89 (m, 1H), 6.86 – 6.83 (m, 1H), 6.73 – 6.69 (m, 1H), 6.34 (d,  $J = 7.7$  Hz, 1H), 5.36 (d,  $J = 10.0$  Hz, 1H), 4.66 (d,  $J = 9.8$  Hz, 1H), 4.48 (t,  $J = 9.9$  Hz, 1H), 3.10 (s, 3H), 3.02 – 2.90 (m, 2H), 2.73 – 2.63 (m, 1H), 2.59 – 2.50 (m, 1H).  $^{13}\text{C NMR}$  (126 MHz,  $\text{CDCl}_3$ )  $\delta$  196.84, 178.61, 143.61, 139.40, 138.10, 137.33, 134.70, 133.75, 132.65, 132.46, 129.16, 128.93, 128.82, 128.15, 128.01, 127.79, 127.67, 127.45, 127.04, 126.86, 126.33, 126.21, 126.06, 125.70, 125.54, 125.14, 123.10, 107.23, 71.03, 64.02, 63.54, 50.72, 42.47, 30.30, 25.95; HRMS (ESI, Orbitrap) calcd for  $\text{C}_{37}\text{H}_{231}\text{N}_2\text{O}_2$   $[\text{M}+\text{H}]^+ = 535.2386$ , found = 535.2388.

**(1'R,2'S,3R,10b'S)-2'-benzoyl-1'-(4-methoxyphenyl)-1-methyl-2',5',6',10b'-tetrahydro-1'H-spiro[indoline-3,3'-pyrrolo[2,1-a]isoquinolin]-2-one (4q):**

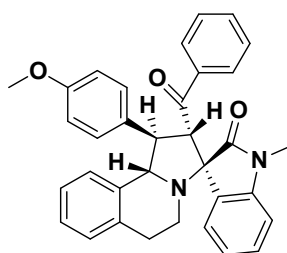

Prepared following the general procedure; pale yellow solid (0.211 g, 82%);  $R_f = 0.58$  (EtOAc/Hexane = 2/6); mp 229-230 °C;  $^1\text{H NMR}$  (500 MHz,  $\text{CDCl}_3$ )  $\delta$  7.60 (d,  $J = 8.7$  Hz, 2H), 7.28 – 7.22 (m, 3H), 7.14 – 7.03 (m, 5H), 7.02 – 6.98 (m, 1H), 6.96 – 6.90 (m, 3H), 6.92 – 6.85 (m, 1H), 6.75 (d,  $J = 7.8$  Hz, 1H), 6.32 (d,  $J = 7.7$  Hz, 1H), 5.15 (d,  $J = 10.1$  Hz, 1H), 4.52 (d,  $J = 9.7$  Hz, 1H), 4.24 (t,  $J = 9.9$  Hz, 1H), 3.81 (s, 3H), 3.07 (s, 3H), 2.92 (d,  $J = 7.7$  Hz, 2H), 2.65 (d,  $J = 12.3$  Hz, 1H), 2.52 – 2.47 (m, 1H).  $^{13}\text{C NMR}$  (126 MHz,  $\text{CDCl}_3$ )  $\delta$  197.01, 178.63, 158.55, 143.58, 138.24, 137.45, 134.71, 133.83, 132.39, 130.02, 129.07,



128.78, 127.77, 127.46, 127.12, 126.26, 126.15, 125.46, 125.04, 123.04, 114.43, 107.16, 70.87, 64.13, 63.59, 55.26, 49.83, 42.39, 30.32, 25.89; HRMS (ESI, Orbitrap) calcd for  $C_{34}H_{31}N_2O_3$   $[M+H]^+ = 515.1335$ , found = 515.2333.

**4-((1'R,2'S,3R,10b'S)-2'-(3-methoxybenzoyl)-1-methyl-2-oxo-2',5',6',10b'-tetrahydro-1'H-spiro[indoline-3,3'-pyrrolo[2,1-a]isoquinolin]-1'-yl)benzotrile (4r):**

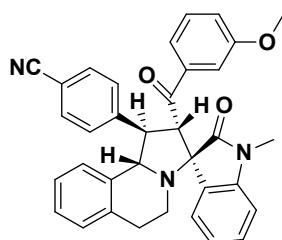

Prepared following the general procedure; pale yellow solid (0.218 g 81%);  $R_f = 0.59$  (EtOAc/Hexane = 2/6); mp 225-226 °C;  $^1H$  NMR (500 MHz,  $CDCl_3$ )  $\delta$  7.85 – 7.80 (m, 2H), 7.73 – 7.68 (m, 2H), 7.13 (t,  $J = 7.4$  Hz, 1H), 7.08 (dd,  $J = 7.7, 1.5$  Hz, 1H), 7.06 – 7.02 (m, 2H), 7.00 (d,  $J = 7.9$  Hz, 1H), 6.96 – 6.89 (m, 2H), 6.85 – 6.80 (m, 2H), 6.73 (dd,  $J = 2.6, 1.6$  Hz, 1H), 6.55 (d,  $J = 7.8$  Hz, 1H), 6.42 – 6.36 (m, 1H), 5.23 (d,  $J = 10.0$  Hz, 1H), 4.44 (d,  $J = 9.7$  Hz, 1H), 4.34 (t,  $J = 9.8$  Hz, 1H), 3.65 (s, 3H), 3.11 (s, 3H), 2.98 – 2.86 (m, 2H), 2.71 – 2.69 (m, 1H), 2.55 – 2.49 (m, 1H).  $^{13}C$  NMR (126 MHz,  $CDCl_3$ )  $\delta$  196.28, 178.32, 159.31, 147.82, 143.70, 138.44, 137.37, 134.76, 132.90, 129.98, 129.40, 129.10, 128.71 X 2, 126.66, 125.99, 125.59, 124.66, 123.15, 119.79, 119.68, 118.91, 111.41, 110.96, 107.44, 70.92, 64.28, 63.61, 55.26, 50.57, 42.32, 30.17, 25.98; HRMS (ESI, Orbitrap) calcd for  $C_{35}H_{30}N_3O_3$   $[M+H]^+ = 540.2287$ , found = 540.2289.

**(1'R,2'S,3R,10b'S)-2'-benzoyl-1-phenyl-1'-(p-tolyl)-2',5',6',10b'-tetrahydro-1'H-spiro[indoline-3,3'-pyrrolo[2,1-a]isoquinolin]-2-one (4s):**

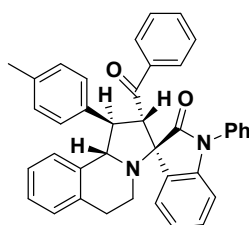

Prepared following the general procedure; pale yellow solid (0.210 g, 75%);  $R_f = 0.53$  (EtOAc/Hexane = 2/6); mp 233-234 °C;  $^1H$  NMR (500 MHz,  $CDCl_3$ )  $\delta$  7.59 – 7.55 (m, 2H), 7.52 (dd,  $J = 8.3, 7.0$  Hz, 2H), 7.44 – 7.38 (m, 3H), 7.33 – 7.22 (m, 3H), 7.19 – 7.15 (m, 3H), 7.15 – 7.11 (m, 2H), 7.11 – 7.05 (m, 2H), 6.97 – 6.90 (m, 3H), 6.76 (d,  $J = 7.8$  Hz, 1H), 6.45

– 6.37 (m, 1H), 5.22 (d,  $J = 10.1$  Hz, 1H), 4.65 (d,  $J = 9.6$  Hz, 1H), 4.33 (t,  $J = 9.9$  Hz, 1H), 3.10 – 2.90 (m, 2H), 2.77 – 2.62 (m, 2H), 2.33 (s, 3H).  $^{13}\text{C}$  NMR (126 MHz,  $\text{CDCl}_3$ )  $\delta$  196.73, 177.91, 143.44, 138.74, 138.11, 137.53, 136.37, 134.47, 134.00, 132.43, 129.64, 129.47, 128.84, 128.81, 128.67, 128.01, 127.50, 126.72, 126.55, 126.18, 125.93, 125.38, 124.98, 123.43, 108.48, 70.64, 63.97, 63.54, 50.03, 42.18, 30.27, 21.02 (One peak is missing due to overlap); HRMS (ESI, Orbitrap) calcd for  $\text{C}_{39}\text{H}_{33}\text{N}_2\text{O}_2$   $[\text{M}+\text{H}]^+ = 561.2542$ , found = 561.2540.

**(1'R,2'S,3R,10b'S)-2'-benzoyl-1'-(naphthalen-2-yl)-1-phenyl-2',5',6',10b'-tetrahydro-1'H-spiro[indoline-3,3'-pyrrolo[2,1-a]isoquinolin]-2-one (4t):**

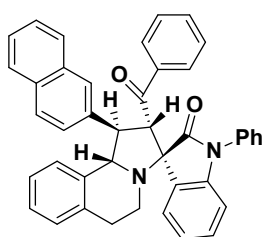

Prepared following the general procedure; yellow solid (0.224 g, 75%);  $R_f = 0.63$  (EtOAc/Hexane = 2/6); mp 211-212 °C;  $^1\text{H}$  NMR (500 MHz,  $\text{CDCl}_3$ )  $\delta$  8.11 (s, 1H), 7.94 – 7.88 (m, 2H), 7.87 – 7.82 (m, 2H), 7.54 (t,  $J = 7.7$  Hz, 2H), 7.50 – 7.42 (m, 3H), 7.40 (dd,  $J = 8.3, 1.5$  Hz, 2H), 7.32 – 7.26 (m, 3H), 7.22 – 7.17 (m, 1H), 7.15 – 7.08 (m, 4H), 6.98 – 6.93 (m, 2H), 6.88 – 6.84 (m, 1H), 6.73 (d,  $J = 7.8$  Hz, 1H), 6.47 – 6.41 (m, 1H), 5.41 (d,  $J = 10.1$  Hz, 1H), 4.77 (dd,  $J = 9.6, 1.3$  Hz, 1H), 4.56 (t,  $J = 9.6$  Hz, 1H), 3.10 (td,  $J = 10.7, 3.8$  Hz, 1H), 3.01 (td,  $J = 13.8, 11.6, 6.7$  Hz, 1H), 2.77 – 2.69 (m, 2H).  $^{13}\text{C}$  NMR (126 MHz,  $\text{CDCl}_3$ )  $\delta$  196.80, 178.04, 143.60, 139.47, 138.08, 137.55, 134.60, 134.10, 133.77, 132.66, 132.64, 129.64, 129.05, 129.00, 128.84 X 2, 128.20, 128.16, 128.12, 128.01, 127.67, 127.60, 126.81, 126.74, 126.70, 126.38, 126.07, 125.71, 125.58, 125.16, 123.62, 108.67, 70.88, 63.97, 63.56, 50.67, 42.37, 30.38; HRMS (ESI, Orbitrap) calcd for  $\text{C}_{42}\text{H}_{33}\text{N}_2\text{O}_2$   $[\text{M}+\text{H}]^+ = 597.2542$ , found = 597.2548.

**(1'R,2'S,3R,10b'S)-2'-(benzo[d][1,3]dioxole-5-carbonyl)-1-phenyl-1'-(p-tolyl)-2',5',6',10b'-tetrahydro-1'H-spiro[indoline-3,3'-pyrrolo[2,1-a]isoquinolin]-2-one (4u):**

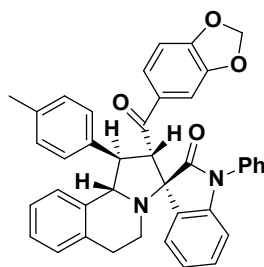

Prepared following the general procedure; yellow solid (0.227 g, 75%);  $R_f = 0.63$  (EtOAc/Hexane = 2/6); mp 257-258 °C;  $^1\text{H NMR}$  (500 MHz,  $\text{CDCl}_3$ )  $\delta$  7.55 (t,  $J = 8.0$  Hz, 4H), 7.47 – 7.40 (m, 1H), 7.37 – 7.31 (m, 2H), 7.19 – 7.13 (m, 3H), 7.12 – 7.04 (m, 3H), 7.00 (td,  $J = 7.7, 1.4$  Hz, 1H), 6.96 – 6.90 (m, 3H), 6.74 (d,  $J = 7.8$  Hz, 1H), 6.56 – 6.49 (m, 2H), 5.89 (dd,  $J = 9.5, 1.3$  Hz, 2H), 5.21 (d,  $J = 10.1$  Hz, 1H), 4.53 (d,  $J = 9.5$  Hz, 1H), 4.32 (t,  $J = 9.8$  Hz, 1H), 3.08 – 2.93 (m, 2H), 2.74 – 2.65 (m, 2H), 2.33 (s, 3H).  $^{13}\text{C NMR}$  (126 MHz,  $\text{CDCl}_3$ )  $\delta$  194.48, 177.98, 151.21, 147.63, 143.48, 138.81, 138.13, 136.33, 134.46, 134.03, 132.53, 129.62, 129.53, 128.87, 128.79, 128.64, 128.08, 126.74, 126.59, 126.14, 126.05, 125.35, 124.97, 123.59, 123.47, 108.53, 107.45, 107.15, 101.55, 70.79, 63.73, 63.48, 50.17, 42.22, 30.26, 21.02; HRMS (ESI, Orbitrap) calcd for  $\text{C}_{40}\text{H}_{33}\text{N}_2\text{O}_4$   $[\text{M}+\text{H}]^+ = 605.2440$ , found = 605.2435.

**4-((1'R,2'S,3R,10b'S)-2'-(3-methoxybenzoyl)-2-oxo-1-phenyl-2',5',6',10b'-tetrahydro-1'H-spiro[indoline-3,3'-pyrrolo[2,1-a]isoquinolin]-1'-yl)benzonitrile (4v):**

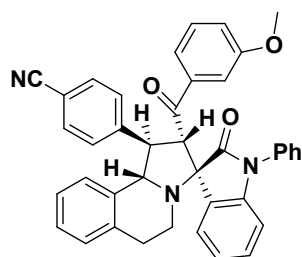

Prepared following the general procedure; yellow solid (0.220 g, 73%);  $R_f = 0.63$  (EtOAc/Hexane = 2/6); mp 207-208 °C;  $^1\text{H NMR}$  (500 MHz,  $\text{CDCl}_3$ )  $\delta$  7.85 – 7.80 (m, 2H), 7.71 – 7.66 (m, 2H), 7.54 (t,  $J = 7.8$  Hz, 2H), 7.47 – 7.41 (m, 1H), 7.32 – 7.28 (m, 2H), 7.16 – 7.10 (m, 3H), 7.07 (dd,  $J = 9.0, 7.6$  Hz, 1H), 7.01 – 6.96 (m, 2H), 6.96 – 6.91 (m, 2H), 6.89 – 6.87 (m, 2H), 6.57 (d,  $J = 7.8$  Hz, 1H), 6.49 – 6.44 (m, 1H), 5.27 (d,  $J = 10.0$  Hz, 1H), 4.55 (d,  $J = 9.5$  Hz, 1H), 4.41 (t,  $J = 9.8$  Hz, 1H), 3.64 (s, 3H), 3.08 – 2.93 (m, 2H), 2.76 – 2.67

(m, 2H).  $^{13}\text{C}$  NMR (126 MHz,  $\text{CDCl}_3$ )  $\delta$  196.08, 177.66, 159.33, 147.75, 143.58, 138.54, 137.23, 134.54, 133.78, 132.82, 129.83, 129.51, 129.17, 129.04, 128.99, 128.20, 126.57, 126.35, 126.23, 125.98, 125.51, 124.56, 123.52, 119.80, 119.52, 118.76, 111.65, 110.89, 108.76, 70.69, 64.04, 63.55, 55.15, 50.37, 42.10, 30.12; HRMS (ESI, Orbitrap) calcd for  $\text{C}_{40}\text{H}_{32}\text{N}_3\text{O}_3$   $[\text{M}+\text{H}]^+ = 602.2444$  found = 602.2440.

**(1'R,2'S,3R,10b'S)-2'-benzoyl-1-benzyl-1'-(naphthalen-2-yl)-2',5',6',10b'-tetrahydro-1'H-spiro[indoline-3,3'-pyrrolo[2,1-a]isoquinolin]-2-one (4w):**

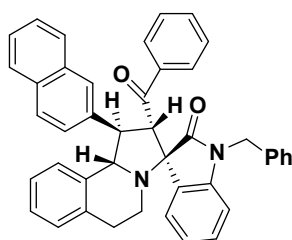

Prepared following the general procedure; yellow solid (0.214 g, 70%);  $R_f = 0.63$  (EtOAc/Hexane = 2/6); mp 226-227 °C;  $^1\text{H}$  NMR (500 MHz,  $\text{CDCl}_3$ )  $\delta$  8.13 – 8.10 (m, 1H), 7.96 – 7.90 (m, 2H), 7.88 (dd,  $J = 7.4, 1.9$  Hz, 1H), 7.86 – 7.82 (m, 1H), 7.52 – 7.41 (m, 2H), 7.36 – 7.32 (m, 1H), 7.32 – 7.30 (m, 3H), 7.30 (dd,  $J = 3.9, 1.6$  Hz, 1H), 7.28 (d,  $J = 1.2$  Hz, 1H), 7.26 (d,  $J = 1.4$  Hz, 1H), 7.22 – 7.18 (m, 1H), 7.12 (dd,  $J = 7.4, 1.4$  Hz, 1H), 7.10 – 7.06 (m, 2H), 6.98 – 6.90 (m, 3H), 6.88 – 6.80 (m, 2H), 6.72 (dd,  $J = 7.8, 1.1$  Hz, 1H), 6.38 – 6.33 (m, 1H), 5.42 (d,  $J = 10.1$  Hz, 1H), 5.00 (d,  $J = 15.4$  Hz, 1H), 4.74 – 4.61 (m, 2H), 4.54 (t,  $J = 9.8$  Hz, 1H), 3.04 – 2.91 (m, 2H), 2.73 – 2.65 (m, 1H), 2.62 – 2.52 (m, 1H).  $^{13}\text{C}$  NMR (126 MHz,  $\text{CDCl}_3$ )  $\delta$  196.81, 178.45, 142.87, 139.41, 137.97, 137.18, 135.69, 134.47, 133.63, 132.53, 132.37, 128.96, 128.87, 128.79, 128.67, 128.00, 127.90, 127.80, 127.69, 127.56, 127.52, 127.40, 126.70, 126.38, 126.21, 125.95, 125.58, 125.44, 125.05, 122.99, 108.20, 70.68, 63.38, 63.28, 50.74, 43.76, 42.30, 30.23. HRMS (ESI, Orbitrap) calcd for  $\text{C}_{43}\text{H}_{35}\text{N}_2\text{O}_2$   $[\text{M}+\text{H}]^+ = 611.2699$ , found = 611.2695.

**(1'R,2'S,3R,10b'S)-2'-(benzo[d][1,3]dioxole-5-carbonyl)-1-benzyl-1'-(p-tolyl)-2',5',6',10b'-tetrahydro-1'H-spiro[indoline-3,3'-pyrrolo[2,1-a]isoquinolin]-2-one (4x):**

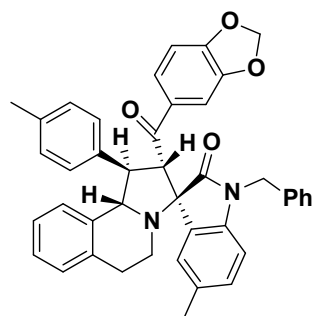

Prepared following the general procedure; yellow solid (0.218 g, 69%);  $R_f = 0.63$  (EtOAc/Hexane = 2/6); mp 238-239 °C;  $^1\text{H NMR}$  (500 MHz,  $\text{CDCl}_3$ )  $\delta$  7.60 – 7.55 (m, 2H), 7.38 – 7.32 (m, 1H), 7.32 – 7.29 (m, 3H), 7.27 (d,  $J = 17.1$  Hz, 1H), 7.19 (d,  $J = 7.8$  Hz, 2H), 7.12 – 7.03 (m, 2H), 6.95 – 6.88 (m, 2H), 6.88 – 6.82 (m, 2H), 6.76 – 6.73 (m, 2H), 6.32 (d,  $J = 7.9$  Hz, 1H), 6.26 (d,  $J = 8.2$  Hz, 1H), 5.86 (dd,  $J = 8.9, 1.3$  Hz, 2H), 5.20 (d,  $J = 10.1$  Hz, 1H), 4.99 (d,  $J = 15.5$  Hz, 1H), 4.69 (d,  $J = 15.3$  Hz, 1H), 4.46 (d,  $J = 9.4$  Hz, 1H), 4.29 (t,  $J = 9.7$  Hz, 1H), 2.96 – 2.90 (m, 2H), 2.68 (dd,  $J = 13.4, 7.5$  Hz, 1H), 2.59 – 2.50 (m, 1H), 2.35 (s, 3H), 2.16 (s, 3H).  $^{13}\text{C NMR}$  (126 MHz,  $\text{CDCl}_3$ )  $\delta$  194.75, 178.38, 151.01, 147.58, 140.47, 138.95, 138.18, 136.30, 135.89, 134.46, 132.57, 132.51, 129.62, 129.12, 128.80, 128.74, 128.61, 127.63, 127.53, 127.11, 126.85, 126.11, 125.32, 124.98, 123.58, 107.90, 107.27, 106.85, 101.44, 70.75, 63.36, 63.28, 50.37, 43.75, 42.32, 30.22, 21.05, 20.81; HRMS (ESI, Orbitrap) calcd for  $\text{C}_{42}\text{H}_{37}\text{N}_2\text{O}_4$   $[\text{M}+\text{H}]^+ = 633.2753$ , found = 633.2752.

**(1'R,2'S,3R,10b'S)-2'-(benzo[d][1,3]dioxole-5-carbonyl)-1'-(p-tolyl)-5-(trifluoromethoxy)-2',5',6',10b'-tetrahydro-1'H-spiro[indoline-3,3'-pyrrolo[2,1-a]isoquinolin]-2-one (4y):**

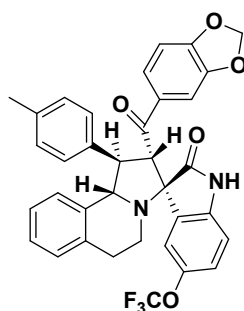

Prepared following the general procedure; yellow solid (0.233 g, 76%);  $R_f = 0.63$  (EtOAc/Hexane = 2/6); mp 234-235 °C;  $^1\text{H NMR}$  (500 MHz,  $\text{CDCl}_3$ )  $\delta$  10.02 (s, 1H), 7.53

(d,  $J = 7.7$  Hz, 2H), 7.18 (d,  $J = 7.7$  Hz, 2H), 7.12 – 7.01 (m, 3H), 6.95 – 6.88 (m, 3H), 6.84 (dd,  $J = 8.4, 2.4$  Hz, 1H), 6.70 (d,  $J = 7.8$  Hz, 1H), 6.60 – 6.51 (m, 2H), 5.90 – 5.86 (m, 2H), 5.14 (d,  $J = 10.1$  Hz, 1H), 4.42 (d,  $J = 9.3$  Hz, 1H), 4.24 (t,  $J = 9.7$  Hz, 1H), 2.94 – 2.94 (m, 2H), 2.68 (d,  $J = 11.7$  Hz, 1H), 2.62 – 2.52 (m, 1H), 2.34 (s, 3H).  $^{13}\text{C}$  NMR (126 MHz,  $\text{CDCl}_3$ )  $\delta$  194.35, 180.35, 151.28, 147.57, 144.07, 140.73, 138.67, 137.83, 136.25, 134.24, 131.97, 129.51, 128.96, 128.61, 128.54, 126.08, 125.21, 124.73, 123.63, 122.23, 121.24, 119.88, 119.20, 109.70, 107.10, 107.07, 101.49, 70.87, 63.18, 62.84, 50.15, 42.25, 30.05, 20.91; HRMS (ESI, Orbitrap) calcd for  $\text{C}_{35}\text{H}_{28}\text{F}_3\text{N}_2\text{O}_5$   $[\text{M}+\text{H}]^+ = 613.1950$ , found = 613.1956.

**(1'R,2'S,3R,8a'R)-2'-(benzo[d][1,3]dioxole-5-carbonyl)-1'-(p-tolyl)-2',5',6',7',8',8a'-hexahydro-1'H-spiro[indoline-3,3'-indolizin]-2-one (5b):**

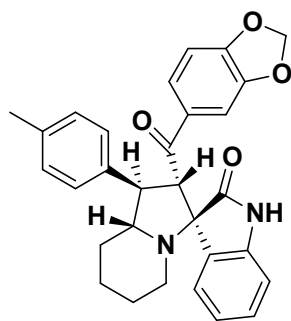

Prepared following the general procedure; yellow solid (0.192 g, 80%);  $R_f = 0.63$  (EtOAc/Hexane = 2/6); mp 195-196 °C;  $^1\text{H}$  NMR (500 MHz,  $\text{CDCl}_3$ )  $\delta$  7.44 (s, 1H), 7.41 – 7.36 (m, 2H), 7.11 (d,  $J = 7.9$  Hz, 2H), 7.11 – 7.06 (m, 1H), 7.05 (dd,  $J = 8.2, 1.8$  Hz, 1H), 6.99 (td,  $J = 7.6, 1.4$  Hz, 1H), 6.93 – 6.83 (m, 2H), 6.53 (d,  $J = 8.1$  Hz, 1H), 6.49 (d,  $J = 7.7$  Hz, 1H), 5.87 (q,  $J = 1.4$  Hz, 2H), 4.31 (d,  $J = 9.8$  Hz, 1H), 3.82 (t,  $J = 9.9$  Hz, 1H), 3.46 (td,  $J = 10.1, 2.5$  Hz, 1H), 2.42 (td,  $J = 11.5, 11.0, 2.9$  Hz, 1H), 2.37 – 2.31 (m, 1H), 2.29 (s, 3H), 1.74 – 1.69 (m, 2H), 1.38 – 1.25 (m, 2H), 1.25 – 1.12 (m, 2H).  $^{13}\text{C}$  NMR (126 MHz,  $\text{CDCl}_3$ )  $\delta$  195.40, 180.25, 151.13, 147.52, 140.31, 137.09, 136.20, 132.49, 129.11, 128.65, 128.37, 127.99, 126.76, 123.65, 122.82, 108.49, 107.30, 107.07, 101.47, 72.33, 65.30, 60.82, 51.49, 45.56, 30.36, 25.54, 23.55, 20.94; HRMS (ESI, Orbitrap) calcd for  $\text{C}_{30}\text{H}_{29}\text{N}_2\text{O}_4$   $[\text{M}+\text{H}]^+ = 481.2127$  found = 481.2131

**(3R,7'S,8'R,8a'S)-7'-(benzo[d][1,3]dioxole-5-carbonyl)-8'-(p-tolyl)-1',3',4',7',8',8a'-hexahydrospiro[indoline-3,6'-pyrrolo[2,1-c][1,4]oxazin]-2-one (5c):**

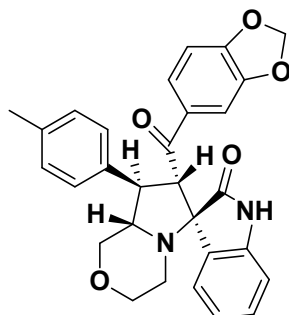

Prepared following the general procedure; yellow solid (0.188 g, 78%);  $R_f = 0.63$  (EtOAc/Hexane = 2/6); mp 220-221 °C;  $^1\text{H NMR}$  (500 MHz,  $\text{CDCl}_3$ )  $\delta$  8.29 (br s, 1H), 7.41 – 7.35 (m, 2H), 7.13 – 7.08 (m, 3H), 7.07 – 6.99 (m, 2H), 6.95 – 6.87 (m, 2H), 6.58 (dd,  $J = 7.8, 2.0$  Hz, 1H), 6.52 (d,  $J = 8.2$  Hz, 1H), 5.85 (dt,  $J = 4.6, 1.4$  Hz, 2H), 4.32 (d,  $J = 9.2$  Hz, 1H), 3.97 – 3.88 (m, 2H), 3.84 (td,  $J = 10.0, 2.9$  Hz, 1H), 3.76 (dd,  $J = 11.1, 3.1$  Hz, 1H), 3.43 – 3.34 (m, 2H), 2.75 (td,  $J = 10.9, 3.4$  Hz, 1H), 2.29 (s, 3H), 2.24 (dd,  $J = 10.9, 2.5$  Hz, 1H).  $^{13}\text{C NMR}$  (126 MHz,  $\text{CDCl}_3$ )  $\delta$  194.94, 179.99, 151.34, 147.62, 140.61, 136.63, 136.10, 132.26, 129.32, 129.08, 128.10, 126.91, 126.69, 123.72, 122.94, 108.99, 107.28, 107.17, 101.55, 72.18, 71.71, 66.42, 62.79, 60.98, 47.68, 45.67, 20.94; HRMS (ESI, Orbitrap) calcd for  $\text{C}_{29}\text{H}_{27}\text{N}_2\text{O}_5$   $[\text{M}+\text{H}]^+ = 483.1920$ , found = 483.1914.

**(1'R,2'S,3R,7a'R)-2'-benzoyl-1'-(2-bromophenyl)-1',2',5',6',7',7a'-hexahydrospiro[indoline-3,3'-pyrrolizin]-2-one (5d):**

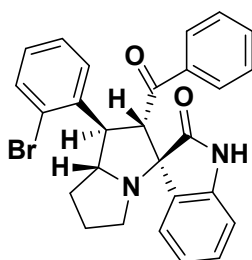

Prepared following the general procedure; yellow solid (0.200 g, 82%);  $R_f = 0.63$  (EtOAc/Hexane = 2/6); mp 235-236 °C;  $^1\text{H NMR}$  (500 MHz,  $\text{CDCl}_3$ )  $\delta$  8.09 (brs, 1H), 7.62 (dd,  $J = 21.0, 7.9$  Hz, 2H), 7.40 (d,  $J = 7.7$  Hz, 2H), 7.31 (m, 3H), 7.15 (m, 3H), 7.09 – 7.00 (m, 2H), 6.58 (m, 1H), 5.05 (d,  $J = 11.5$  Hz, 1H), 4.65 (t,  $J = 10.7$  Hz, 1H), 4.12 (m, 1H), 2.66 (m, 2H), 2.07 – 1.81 (m, 4H).  $^{13}\text{C NMR}$  (126 MHz,  $\text{CDCl}_3$ )  $\delta$  196.70, 180.74, 140.47, 138.86, 136.86, 133.21, 132.76, 129.39, 128.09, 128.03, 127.97, 127.75, 127.31, 125.67, 124.84,

122.49, 109.99, 73.55, 72.92, 64.19, 50.25, 48.24, 29.94, 27(one peak is missing due to overlap); HRMS (ESI, Orbitrap) calcd for  $C_{27}H_{24}BrN_2O_2$   $[M+H]^+ = 487.1021$ , found = 487.1023.

**(1'R,2'S,3R,10b'S)-methyl 2-oxo-1'-phenyl-2',5',6',10b'-tetrahydro-1'H-spiro[indoline-3,3'-pyrrolo[2,1-a]isoquinoline]-2'-carboxylate (5e):**

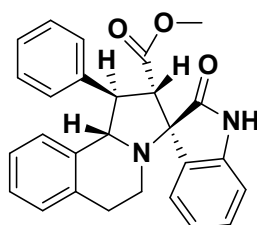

Prepared following the general procedure; white solid (0.174 g, 82%);  $R_f = 0.63$  (EtOAc/Hexane = 2/6); mp 208-209 °C;  $^1H$  NMR (400 MHz, Chloroform- $d$ )  $\delta$  7.64 (dd,  $J = 7.4, 1.3$  Hz, 1H), 7.30 (s, 1H), 7.26 – 7.19 (m, 2H), 7.17–7.11 (m, 6H), 7.10–7.06 (m, 3H), 6.64 (d,  $J = 7.6$  Hz, 1H), 5.68 (d,  $J = 8.4$  Hz, 1H), 4.22 (d,  $J = 6.3$  Hz, 1H), 4.15 (dd,  $J = 8.4, 6.3$  Hz, 1H), 3.46 (s, 3H), 3.11–3.03 (m, 1H), 2.71 (dd,  $J = 9.2, 3.1$  Hz, 2H), 2.62 (dd,  $J = 15.8, 2.8$  Hz, 1H).  $^{13}C$  NMR (101 MHz, Chloroform- $d$ )  $\delta$  177.72, 174.78, 141.56, 136.15, 135.86, 135.20, 129.45, 129.22, 128.62, 128.27, 127.51, 126.26, 125.41, 125.05, 123.20, 109.45, 76.06, 62.74, 58.96, 51.65, 50.82, 42.81, 30.25.(two peaks are missing due to overlap). HRMS (ESI, Orbitrap) calcd for  $C_{27}H_{25}N_2O_3$   $[M+H]^+ = 425.1865$ , found = 425.1869.

### 3. Crystallographic data of product 4q

#### Sample preparation and crystal structure determination of 5f

The pure compound **4q** as obtained from column chromatography was crystallised from ethanol solvent.

X-ray data for the compounds **4q** was collected at room temperature on a Bruker D8 QUEST instrument with an  $I\mu S$  Mo microsource ( $\lambda = 0.7107$  Å) and a PHOTON-100 detector. The raw data frames were reduced and corrected for absorption effects using the Bruker Apex 3 software suite programs [1]. The structure was solved using the intrinsic phasing method [2] and further refined with the SHELXL [2] program and expanded using Fourier techniques. Anisotropic displacement parameters were included for all non-hydrogen atoms. All C bound H atoms were positioned geometrically and treated as riding on their parent C atoms [C-H =



0.93-0.97 Å and  $U_{\text{iso}}(\text{H}) = 1.5U_{\text{eq}}(\text{C})$  for methyl H or  $1.2U_{\text{eq}}(\text{C})$  for other H atoms]. The methyl groups were allowed to rotate but not to tip. The ethanol solvate of **4q** could not be resolved due to extensive disorder, and their assumed presence was removed from the overall scattering by the PLATON SQUEEZE procedure. The N bound H atoms of **4q** were located in a difference density map and refined isotropically.

Crystal Data for **4q**:  $\text{C}_{34}\text{H}_{30}\text{N}_2\text{O}_3$  ( $M = 514.60$  g/mol): monoclinic, space group  $P2_1/c$  (no. 14),  $a = 9.56320(10)$  Å,  $b = 17.8067(3)$  Å,  $c = 16.1958(3)$  Å,  $\beta = 103.4627(6)^\circ$ ,  $V = 2682.18(7)$  Å<sup>3</sup>,  $Z = 4$ ,  $T = 294.15$  K,  $\mu(\text{MoK}\alpha) = 0.081$  mm<sup>-1</sup>,  $D_{\text{calc}} = 1.274$  g/cm<sup>3</sup>, 24289 reflections measured ( $4.574^\circ \leq 2\theta \leq 52.496^\circ$ ), 5392 unique ( $R_{\text{int}} = 0.0552$ ,  $R_{\text{sigma}} = 0.0474$ ) which were used in all calculations. The final  $R_1$  was 0.0549 ( $I > 2\sigma(I)$ ) and  $wR_2$  was 0.1500 (all data).

CCDC 1983982 contains supplementary Crystallographic data for the structure. These data can be obtained free of charge from the Cambridge Crystallographic Data Centre (CCDC), 12 Union Road, Cambridge CB2 1EZ, UK; fax: +44(0) 1223 336 033; email: [deposit@ccdc.cam.ac.uk](mailto:deposit@ccdc.cam.ac.uk)].

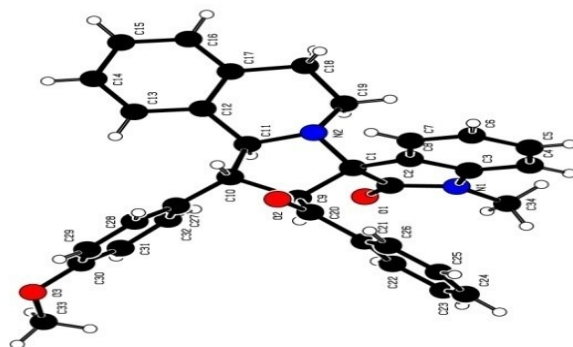

**Figure S1:** X-ray crystal structure of **5q** Thermal ellipsoids are drawn at 30% probability

## checkCIF/PLATON report

Structure factors have been supplied for datablock(s) KA904\_0m

THIS REPORT IS FOR GUIDANCE ONLY. IF USED AS PART OF A REVIEW PROCEDURE FOR PUBLICATION, IT SHOULD NOT REPLACE THE EXPERTISE OF AN EXPERIENCED CRYSTALLOGRAPHIC REFEREE.

No syntax errors found.      CIF dictionary      Interpreting this report

### Datablock: KA904\_0m

---

Bond precision:    C-C = 0.0031 Å                      Wavelength=0.71073

Cell:                      a=9.5632(1)              b=17.8067(3)              c=16.1958(3)  
                                    alpha=90              beta=103.4627(6)              gamma=90  
Temperature:              294 K

|                        | Calculated    | Reported      |
|------------------------|---------------|---------------|
| Volume                 | 2682.18(7)    | 2682.18(7)    |
| Space group            | P 21/c        | P 21/c        |
| Hall group             | -P 2ybc       | -P 2ybc       |
| Moiety formula         | C34 H30 N2 O3 | C34 H30 N2 O3 |
| Sum formula            | C34 H30 N2 O3 | C34 H30 N2 O3 |
| Mr                     | 514.60        | 514.60        |
| Dx, g cm <sup>-3</sup> | 1.274         | 1.274         |
| Z                      | 4             | 4             |
| Mu (mm <sup>-1</sup> ) | 0.081         | 0.081         |
| F000                   | 1088.0        | 1088.0        |
| F000'                  | 1088.46       |               |
| h, k, lmax             | 11, 22, 20    | 11, 22, 20    |
| Nref                   | 5399          | 5392          |
| Tmin, Tmax             | 0.979, 0.990  | 0.565, 0.746  |
| Tmin'                  | 0.979         |               |

Correction method= # Reported T Limits: Tmin=0.565 Tmax=0.746  
AbsCorr = MULTI-SCAN

Data completeness= 0.999                      Theta(max)= 26.248

R(reflections)= 0.0549( 4055)              wR2(reflections)= 0.1500( 5392)

S = 1.057                      Npar= 378

---

The following ALERTS were generated. Each ALERT has the format  
**test-name\_ALERT\_alert-type\_alert-level.**  
Click on the hyperlinks for more details of the test.

---

● **Alert level C**

|                   |                     |                                 |           |
|-------------------|---------------------|---------------------------------|-----------|
| PLAT220_ALERT_2_C | NonSolvent Resd 1 C | Ueq(max) / Ueq(min) Range       | 3.1 Ratio |
| PLAT241_ALERT_2_C | High MainMol        | Ueq as Compared to Neighbors of | C18 Check |
| PLAT241_ALERT_2_C | High MainMol        | Ueq as Compared to Neighbors of | C29 Check |
| PLAT241_ALERT_2_C | High MainMol        | Ueq as Compared to Neighbors of | C31 Check |
| PLAT911_ALERT_3_C | Missing FCF Refl    | Between Thmin & STh/L= 0.600    | 3 Report  |

---

● **Alert level G**

|                   |                                                  |                       |             |
|-------------------|--------------------------------------------------|-----------------------|-------------|
| PLAT171_ALERT_4_G | The CIF-Embedded .res File                       | Contains EADP Records | 1 Report    |
| PLAT230_ALERT_2_G | Hirshfeld Test Diff for                          | C29 --C30 .           | 10.7 s.u.   |
| PLAT230_ALERT_2_G | Hirshfeld Test Diff for                          | C29 --C30D .          | 10.0 s.u.   |
| PLAT230_ALERT_2_G | Hirshfeld Test Diff for                          | C30 --C31 .           | 19.7 s.u.   |
| PLAT230_ALERT_2_G | Hirshfeld Test Diff for                          | C31 --C30D .          | 7.0 s.u.    |
| PLAT301_ALERT_3_G | Main Residue Disorder                            | .....(Resd 1 )        | 8% Note     |
| PLAT413_ALERT_2_G | Short Inter XH3 .. XHn                           | H24 ..H33D .          | 2.09 Ang.   |
|                   |                                                  | 1-x,1-y,1-z =         | 3_666 Check |
| PLAT432_ALERT_2_G | Short Inter X...Y Contact                        | C6 ..C33D             | 3.18 Ang.   |
|                   |                                                  | 1-x,-1/2+y,3/2-z =    | 2_646 Check |
| PLAT793_ALERT_4_G | Model has Chirality at C1                        | (Centro SPGR)         | R Verify    |
| PLAT793_ALERT_4_G | Model has Chirality at C9                        | (Centro SPGR)         | S Verify    |
| PLAT793_ALERT_4_G | Model has Chirality at C10                       | (Centro SPGR)         | R Verify    |
| PLAT793_ALERT_4_G | Model has Chirality at C11                       | (Centro SPGR)         | S Verify    |
| PLAT883_ALERT_1_G | No Info/Value for _atom_sites_solution_primary   | .                     | Please Do ! |
| PLAT910_ALERT_3_G | Missing # of FCF Reflection(s) Below Theta(Min). | .                     | 2 Note      |
| PLAT912_ALERT_4_G | Missing # of FCF Reflections Above STh/L= 0.600  | .                     | 2 Note      |
| PLAT913_ALERT_3_G | Missing # of Very Strong Reflections in FCF .... | .                     | 1 Note      |
| PLAT978_ALERT_2_G | Number C-C Bonds with Positive Residual Density. | .                     | 4 Info      |
| PLAT992_ALERT_5_G | Repd & Actual _reflns_number_gt Values Differ by | .                     | 1 Check     |

---

0 **ALERT level A** = Most likely a serious problem - resolve or explain  
0 **ALERT level B** = A potentially serious problem, consider carefully  
5 **ALERT level C** = Check. Ensure it is not caused by an omission or oversight  
18 **ALERT level G** = General information/check it is not something unexpected

1 ALERT type 1 CIF construction/syntax error, inconsistent or missing data  
11 ALERT type 2 Indicator that the structure model may be wrong or deficient  
4 ALERT type 3 Indicator that the structure quality may be low  
6 ALERT type 4 Improvement, methodology, query or suggestion  
1 ALERT type 5 Informative message, check

---



PLATON version of 22/12/2019; check.def file version of 13/12/2019

Data blockshelxl\_sq - ellipsoid plot

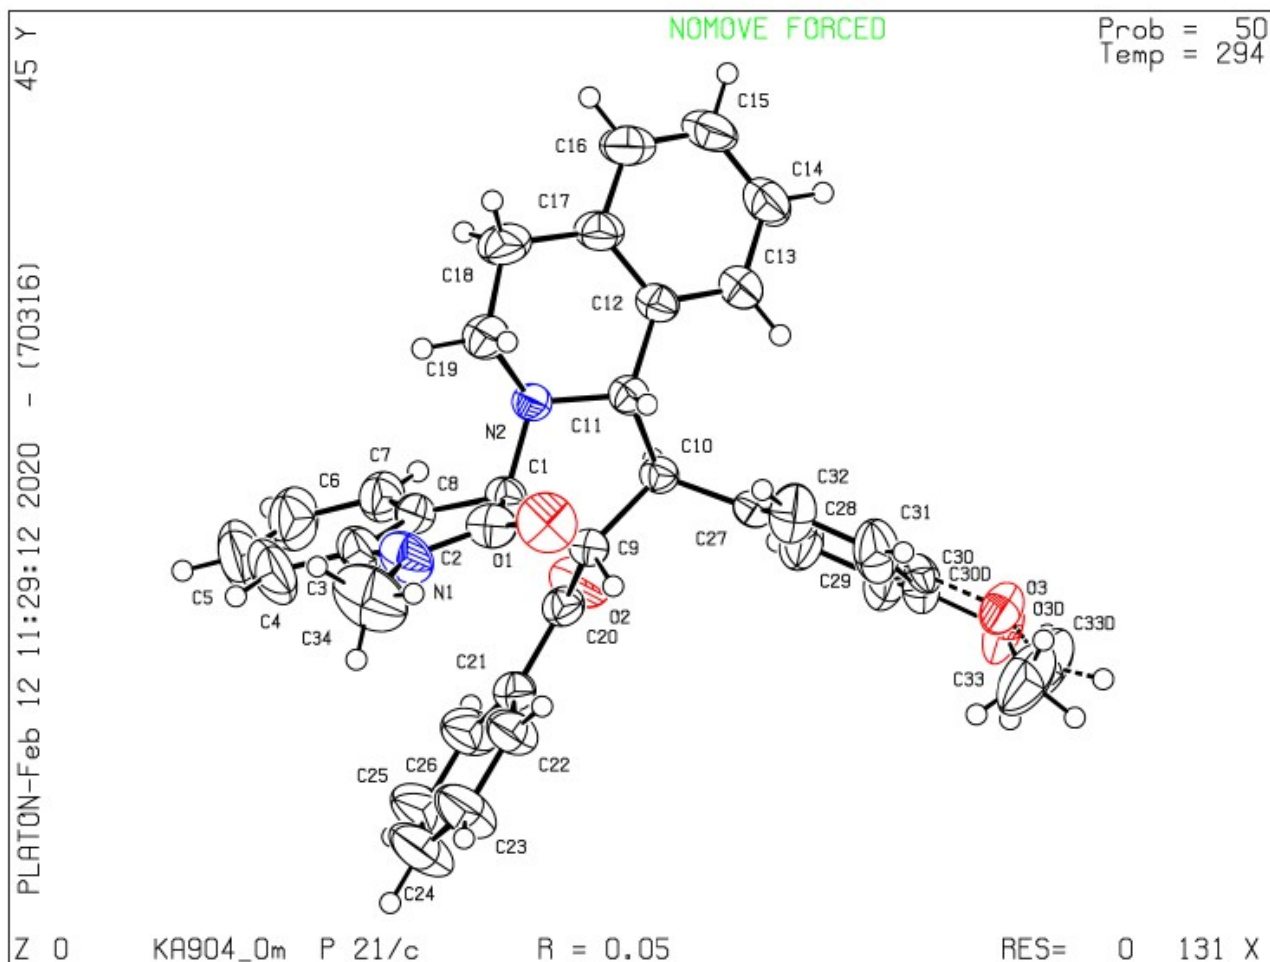

## 4. Copies of NMR Spectra

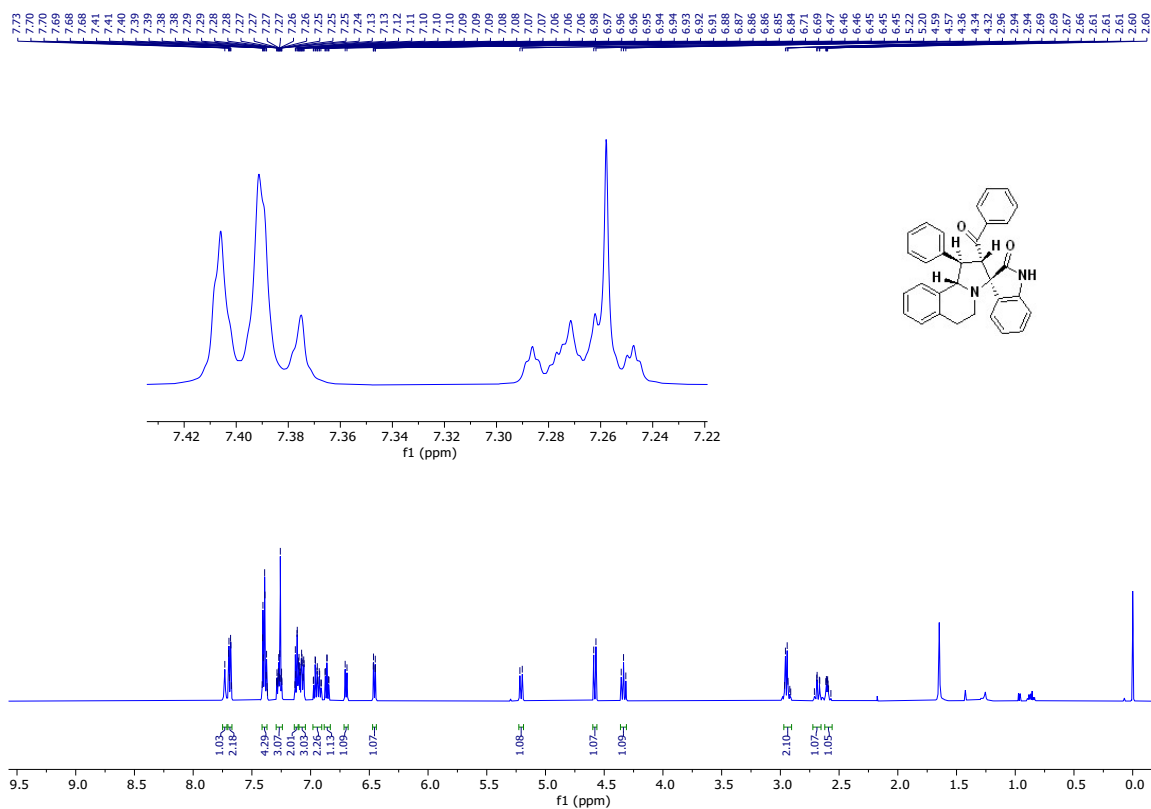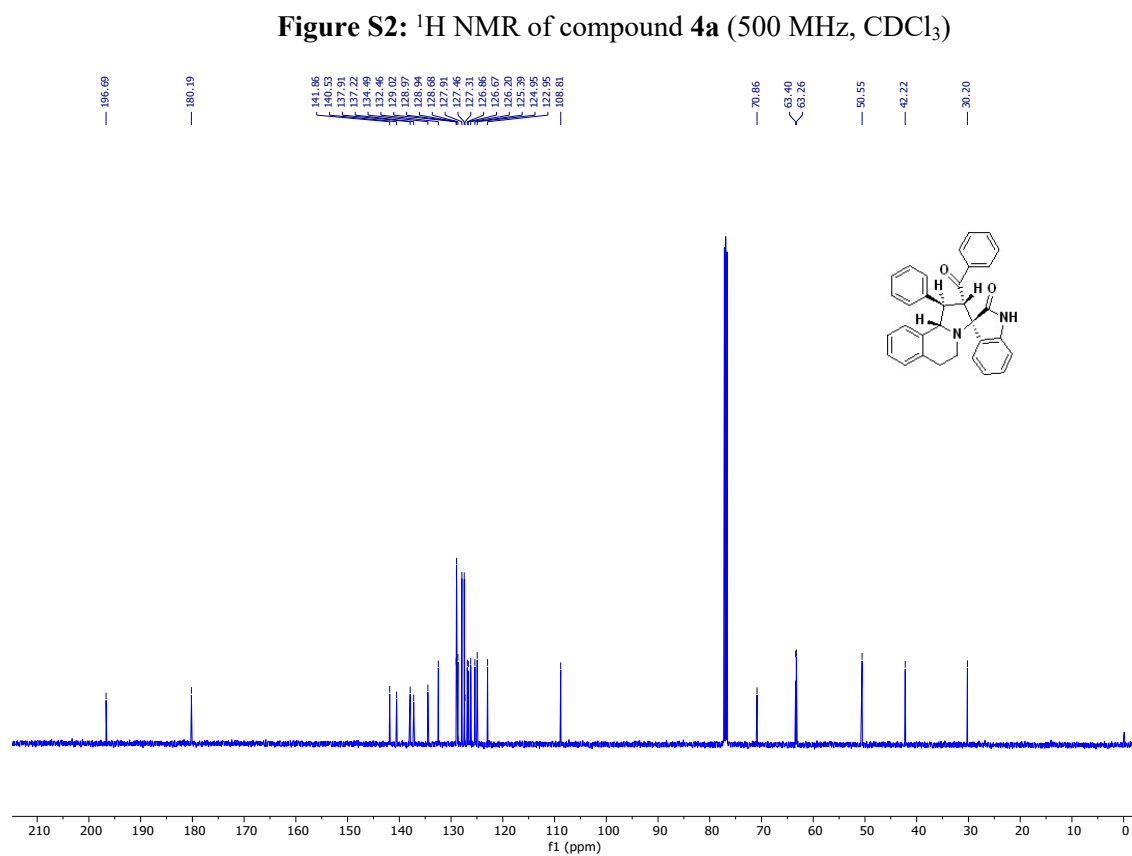

**Figure S3: <sup>13</sup>C NMR of compound 4a (126 MHz, CDCl<sub>3</sub>)**

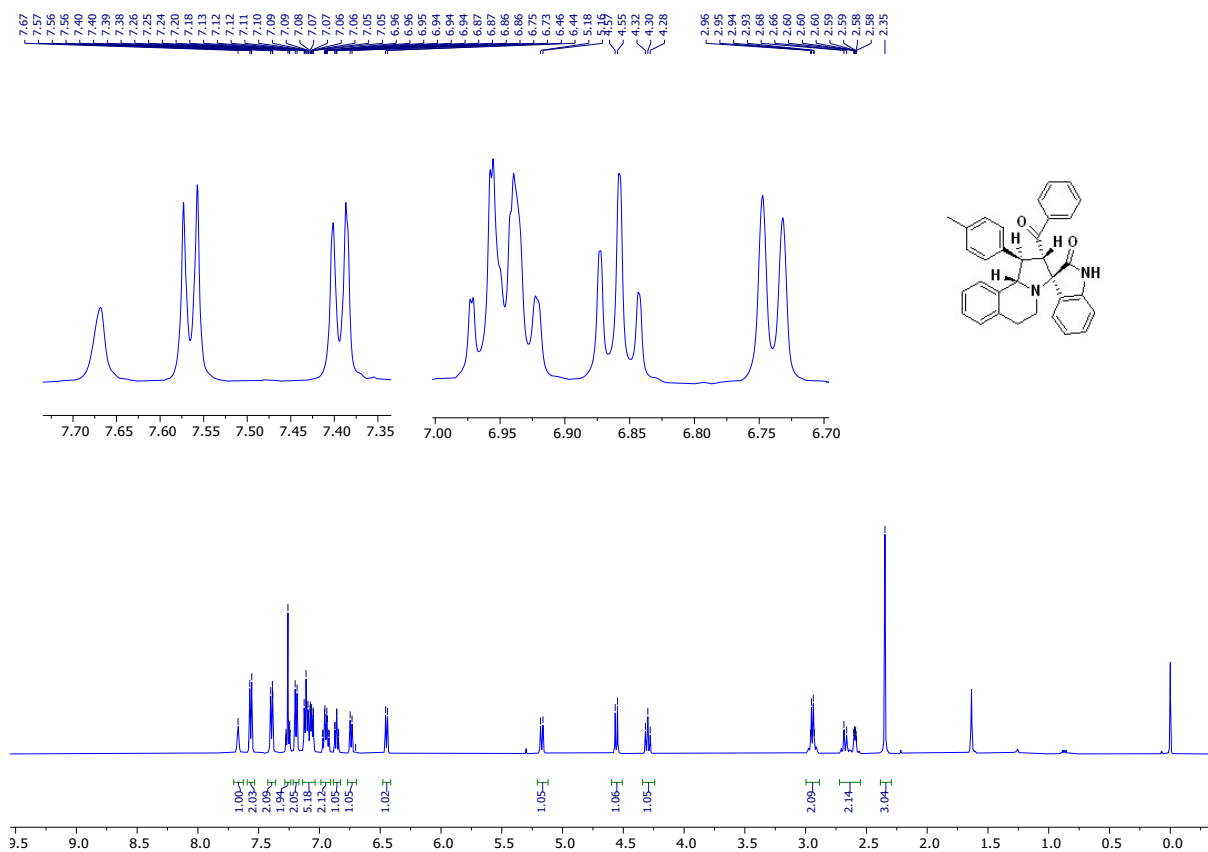

**Figure S4:**  $^1\text{H}$  NMR of compound **4b** (500 MHz,  $\text{CDCl}_3$ )

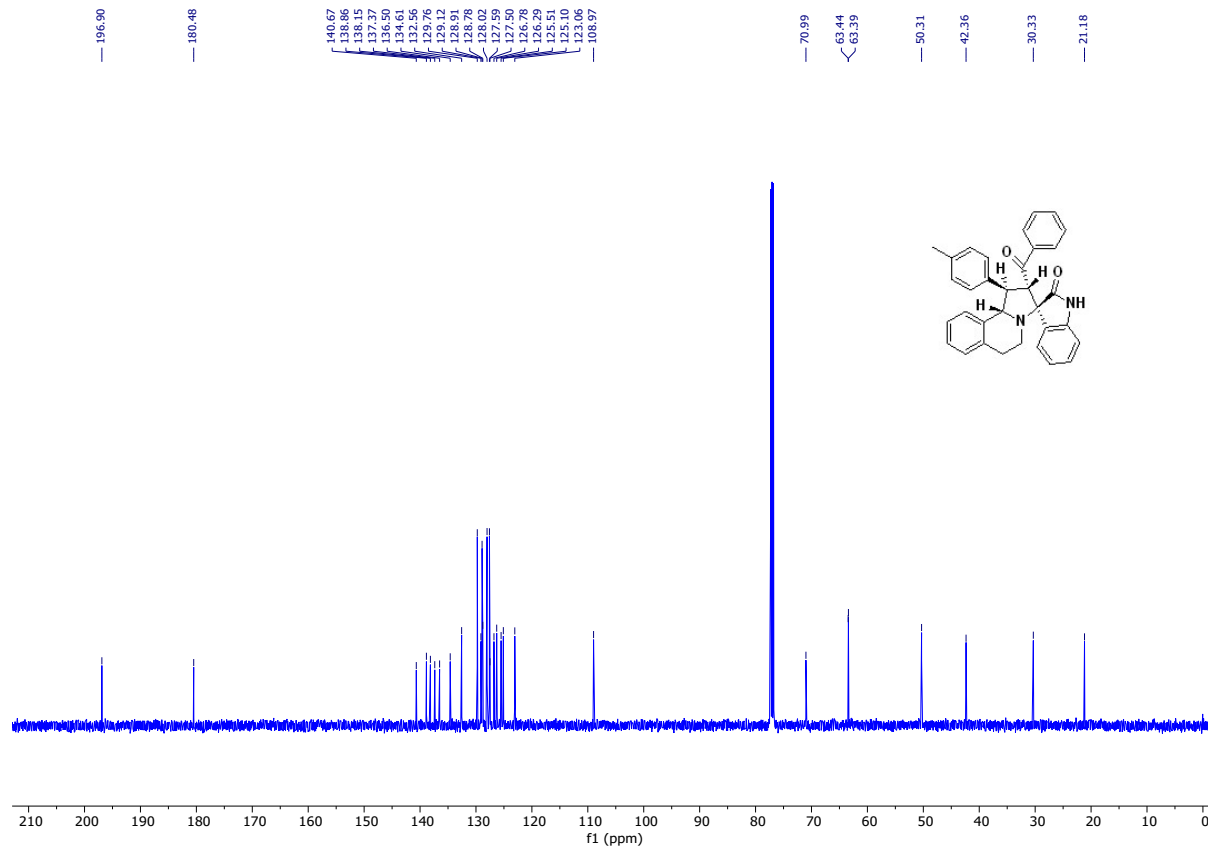

**Figure S5:**  $^{13}\text{C}$  NMR of compound **4b** (126 MHz,  $\text{CDCl}_3$ )

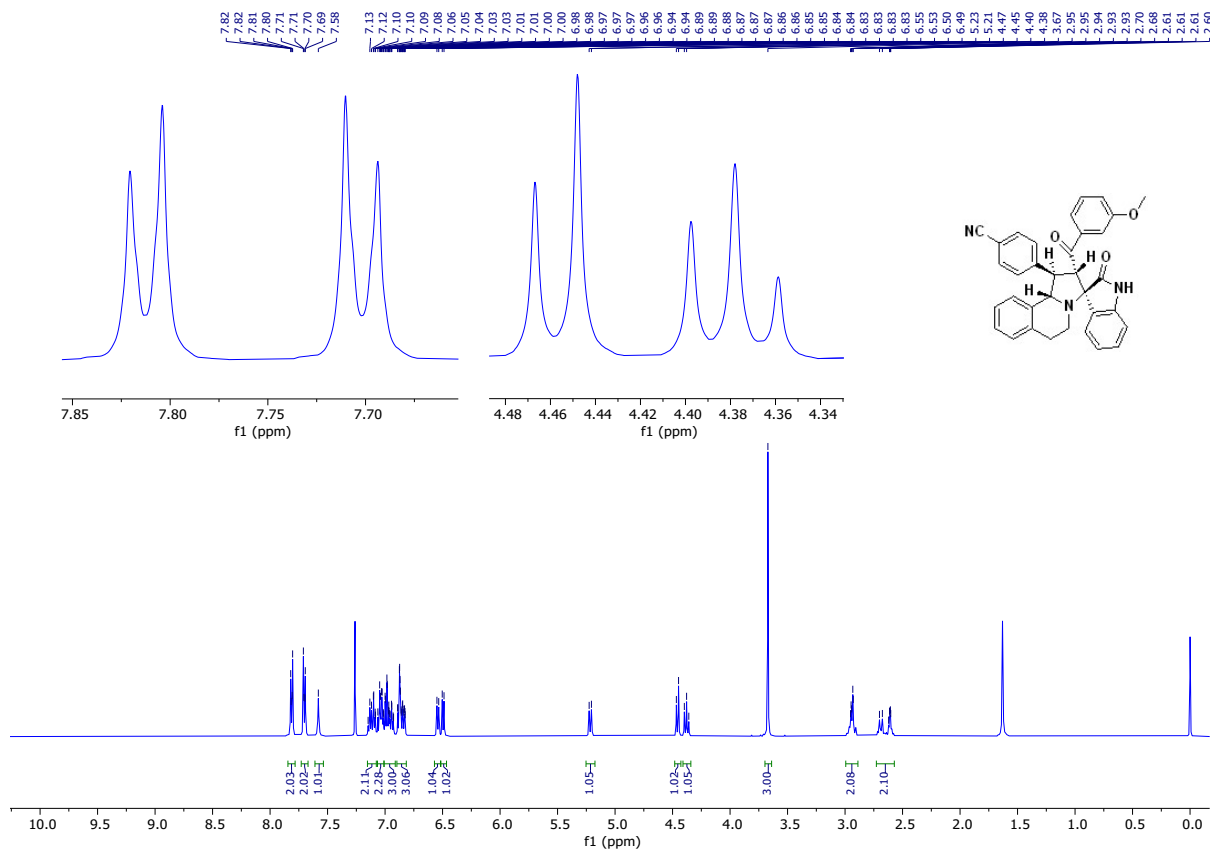

**Figure S6: <sup>1</sup>H NMR of compound 4c (500 MHz, CDCl<sub>3</sub>)**

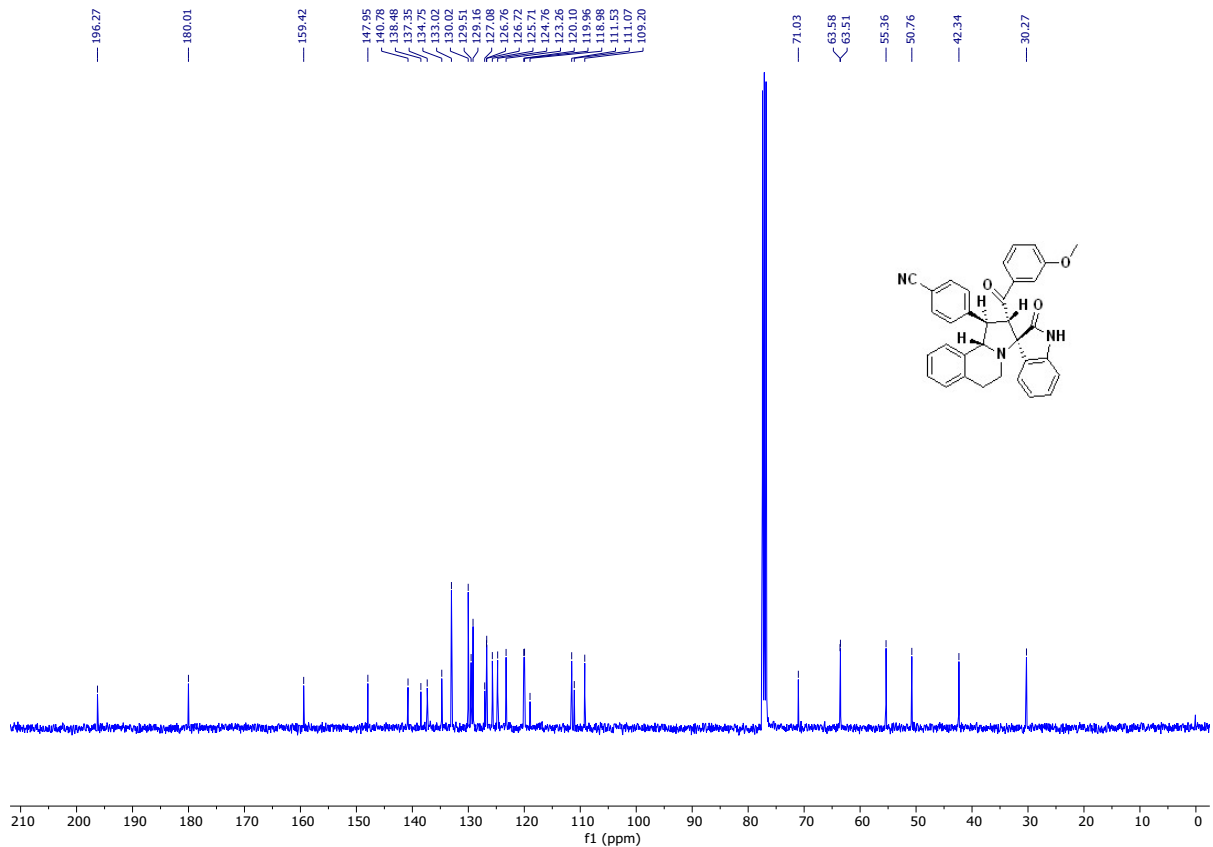

**Figure S7: <sup>13</sup>C NMR of compound 4c (126 MHz, CDCl<sub>3</sub>)**

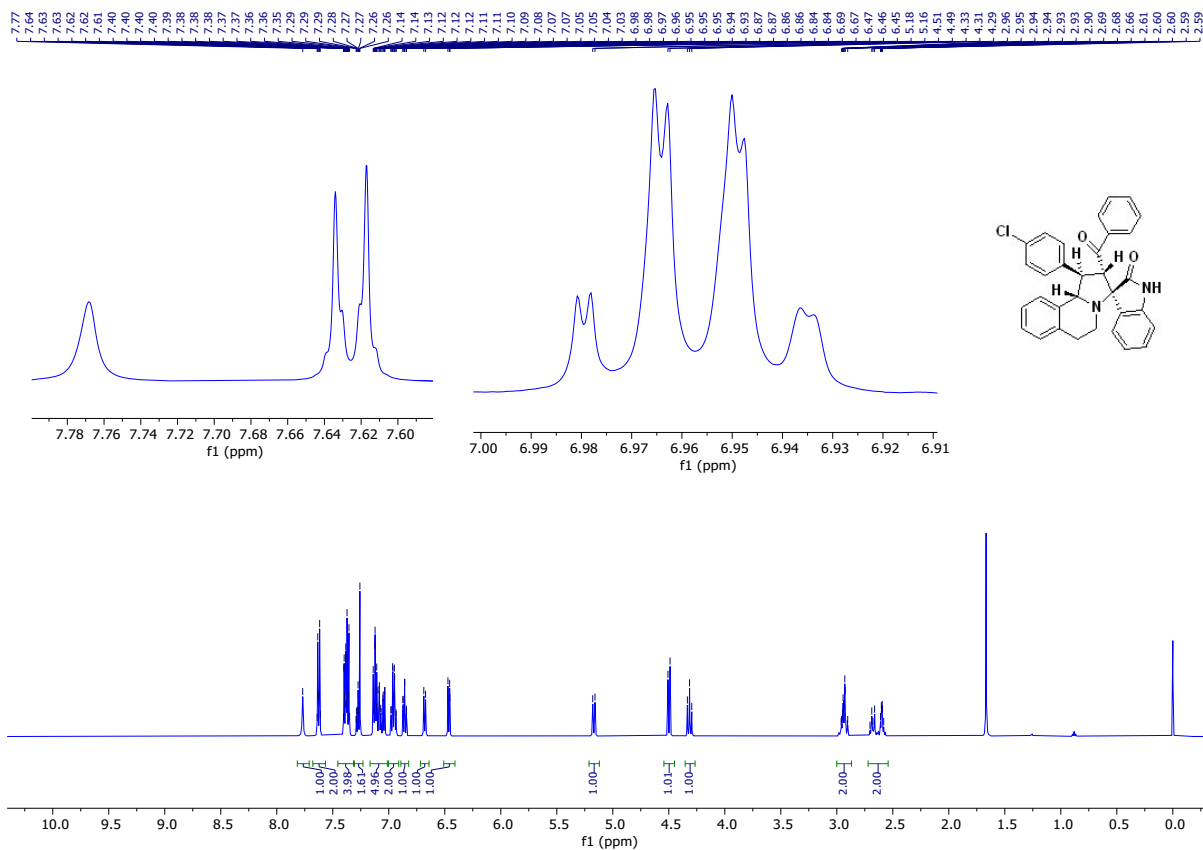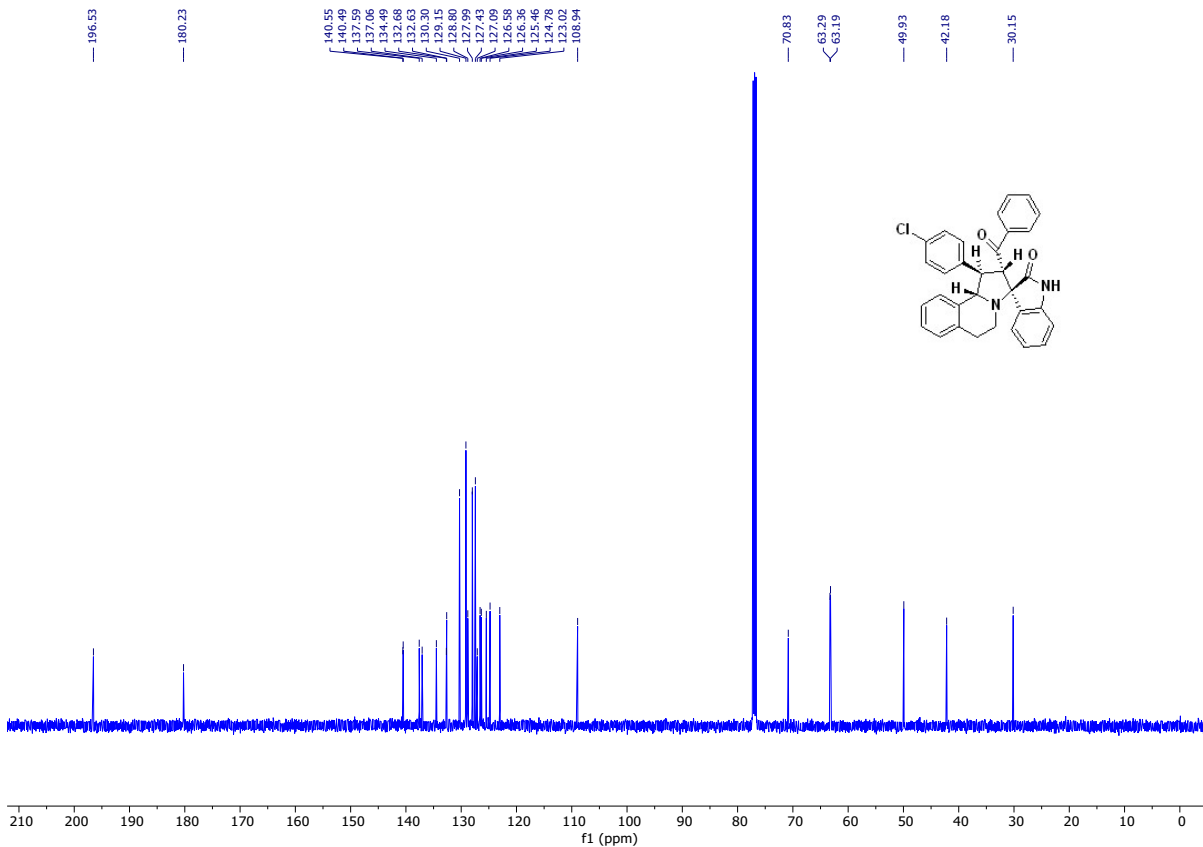





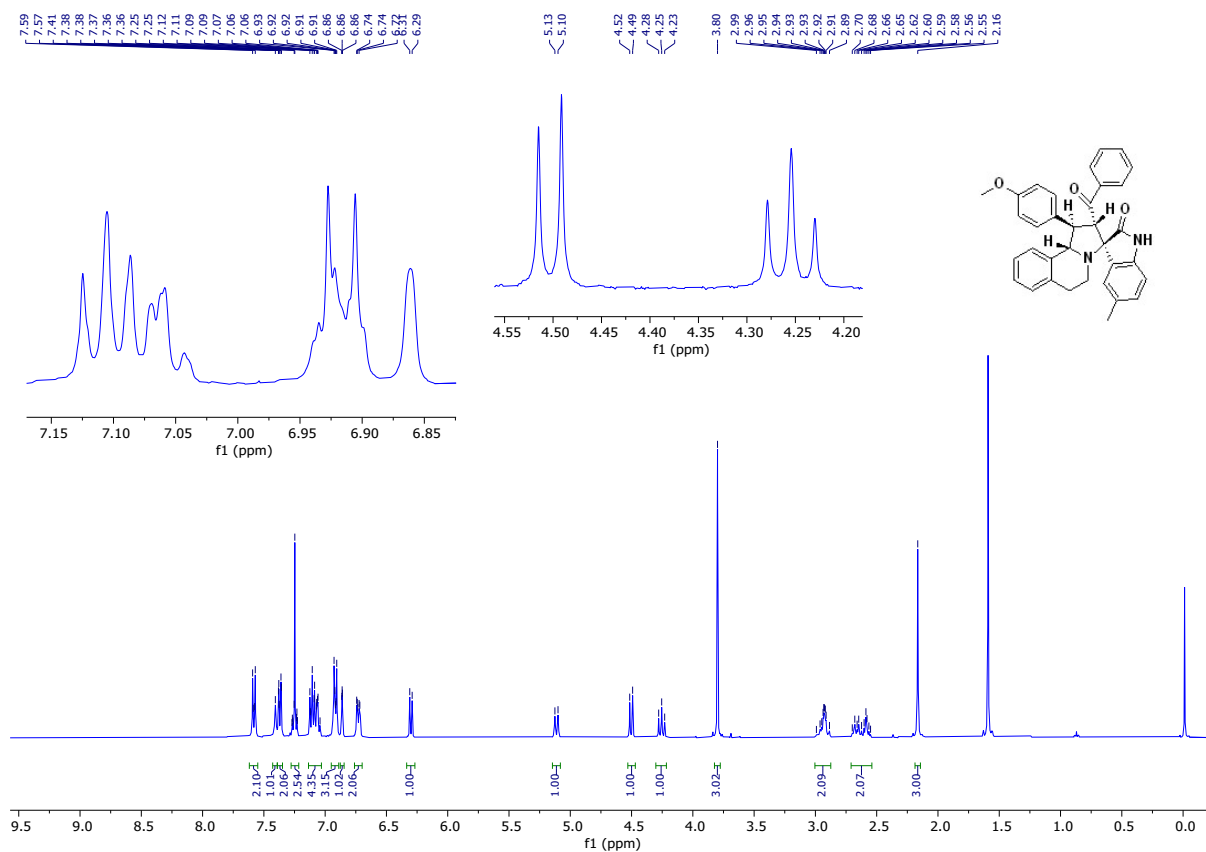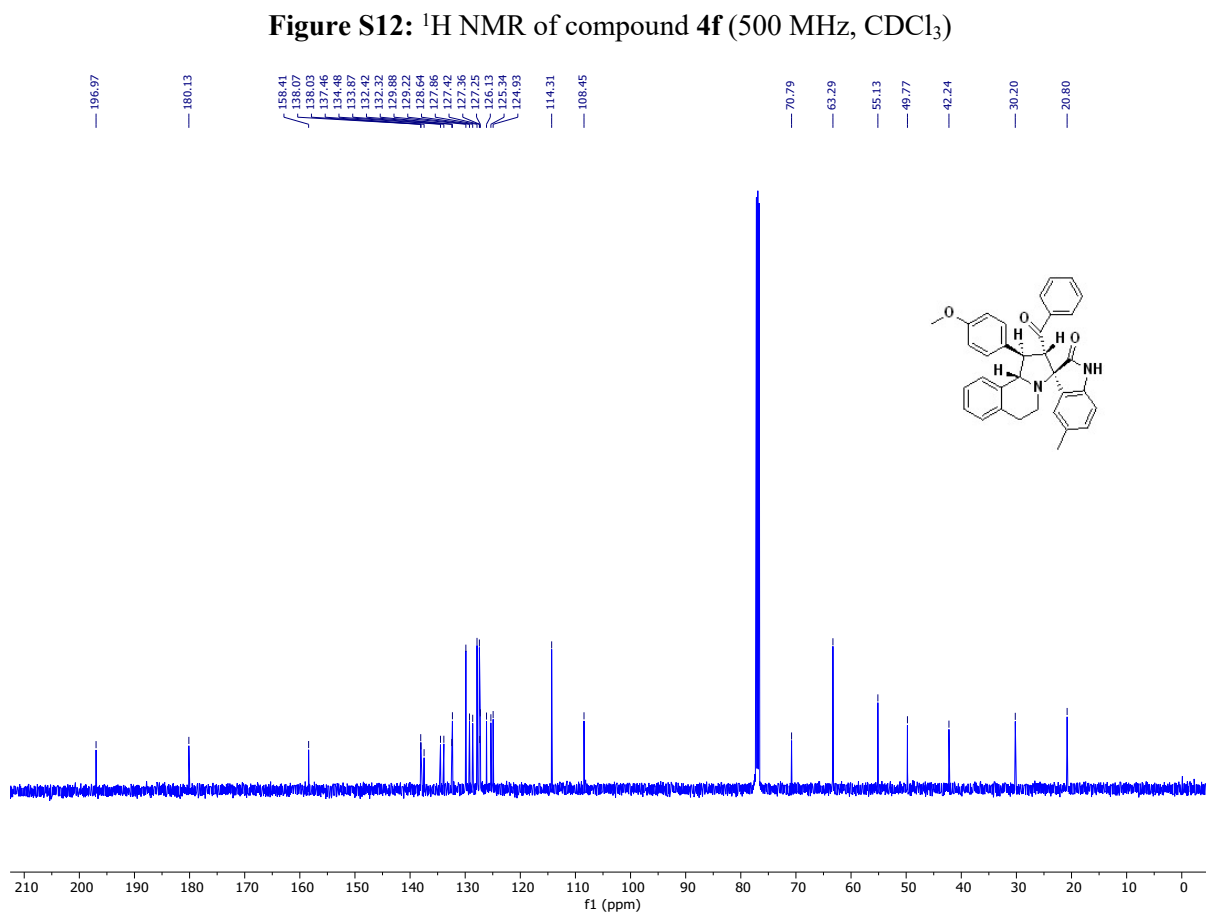

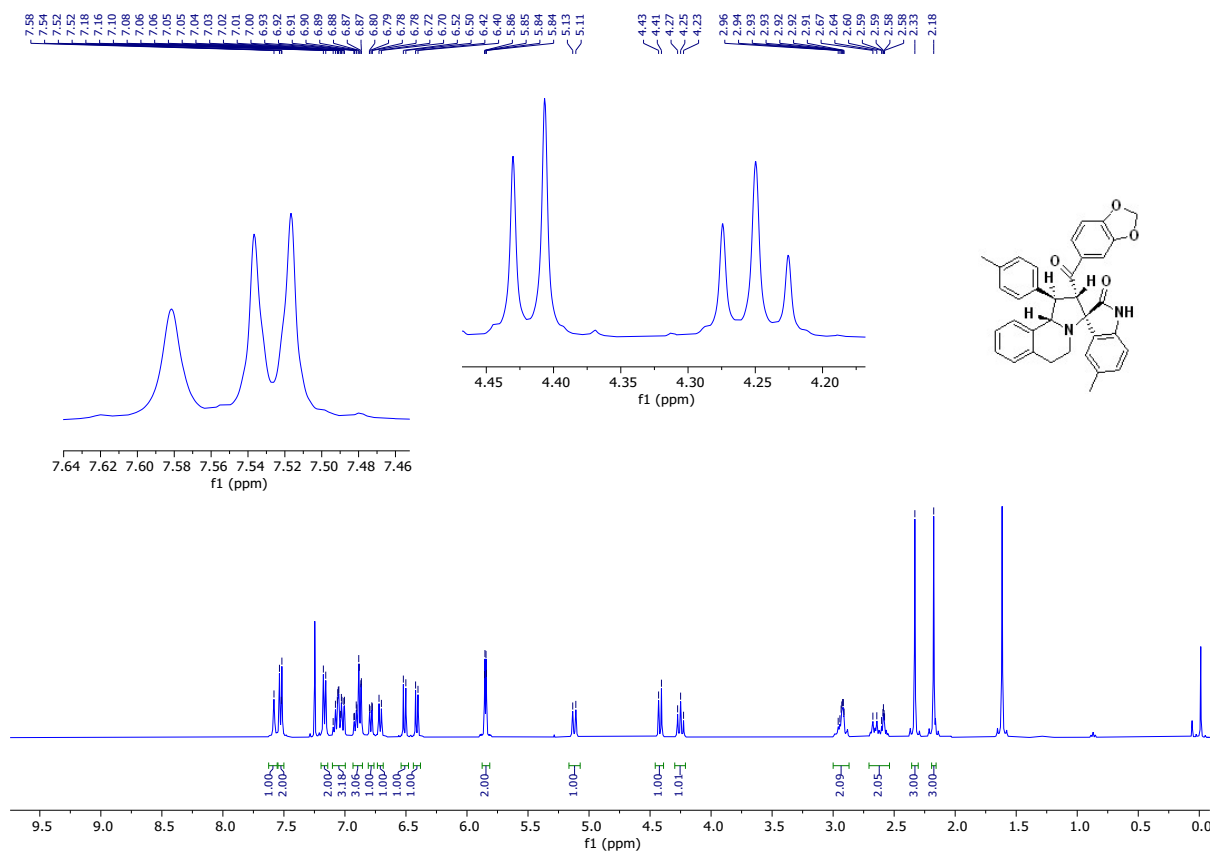

**Figure S14:  $^1\text{H}$  NMR of compound **4g** (500 MHz,  $\text{CDCl}_3$ )**

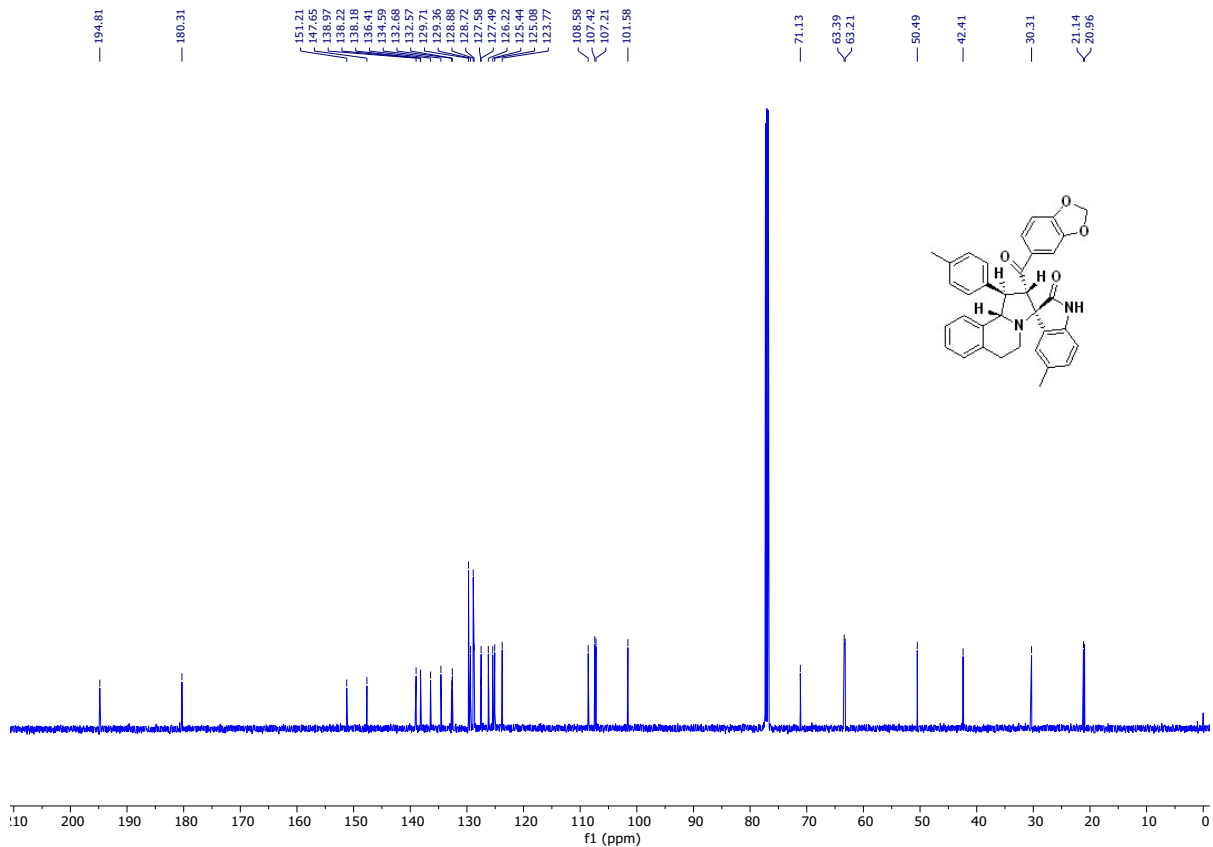

**Figure S15:  $^{13}\text{C}$  NMR of compound **4g** (126 MHz,  $\text{CDCl}_3$ )**

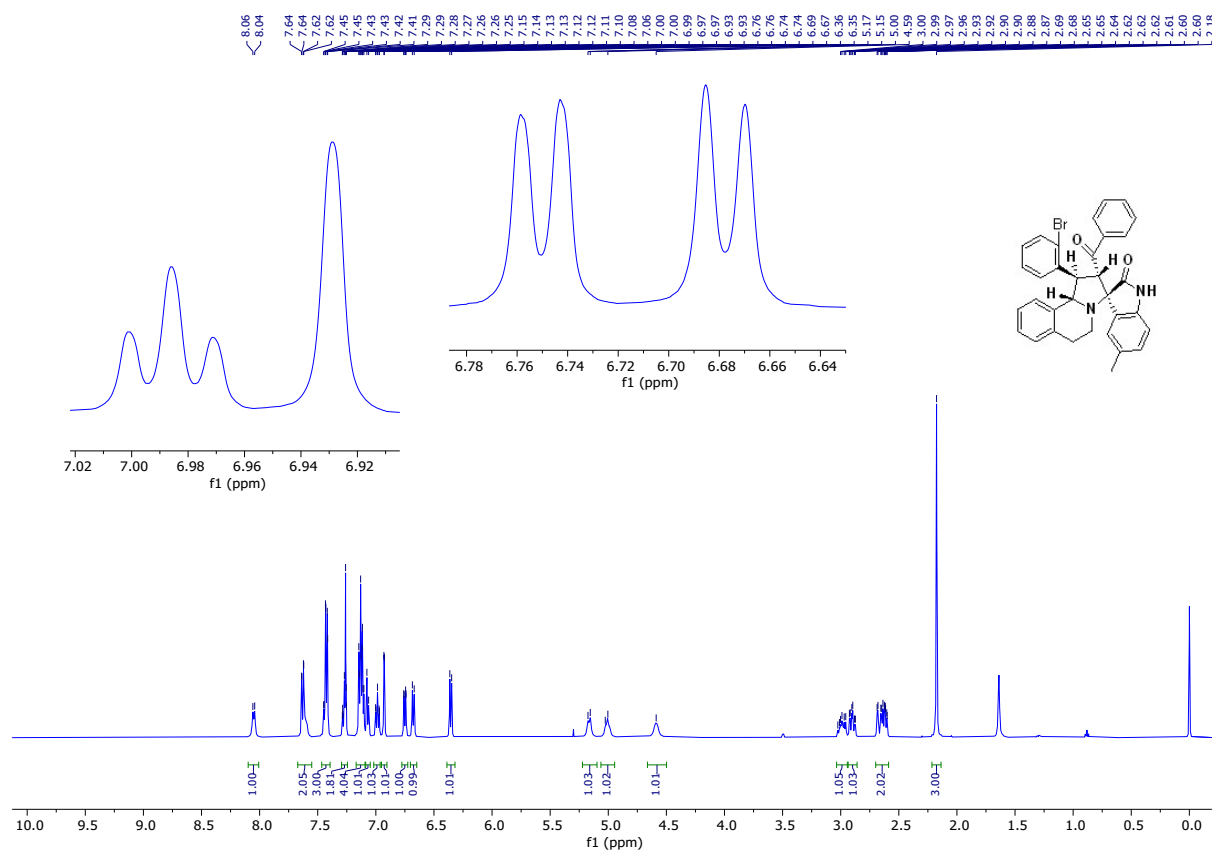

**Figure S16:**  $^1\text{H}$  NMR of compound **4h** (500 MHz,  $\text{CDCl}_3$ )

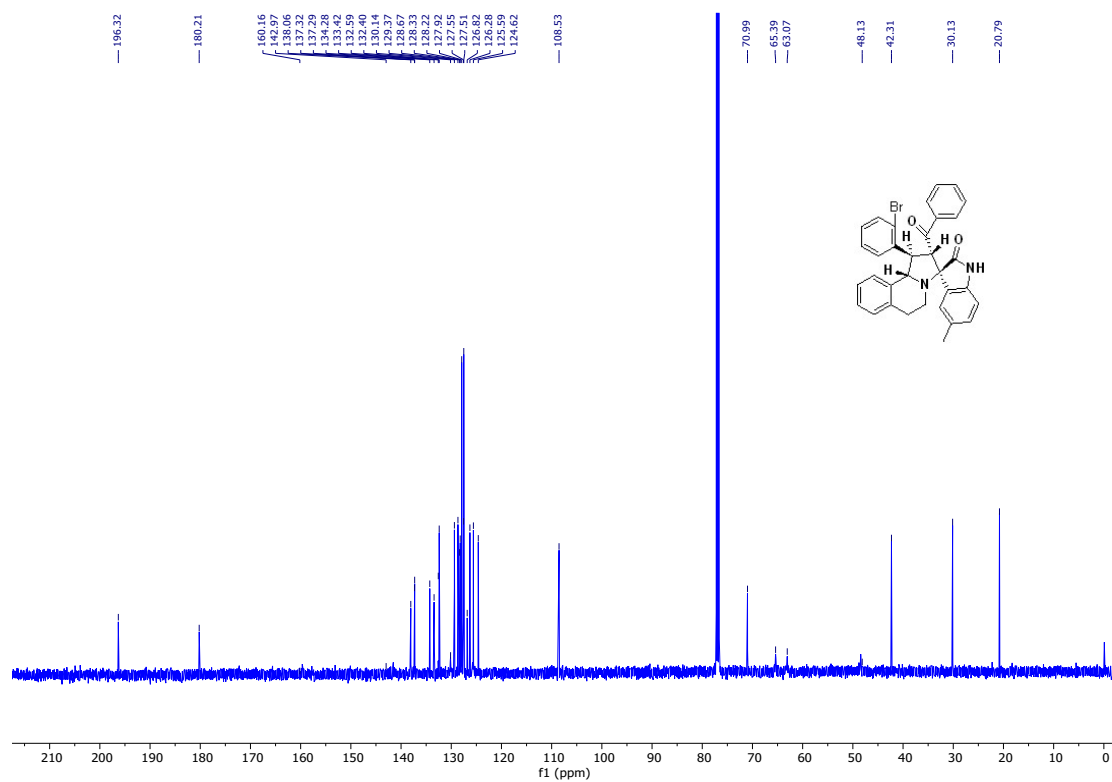

**Figure S17:**  $^{13}\text{C}$  NMR of compound **4h** (126 MHz,  $\text{CDCl}_3$ )

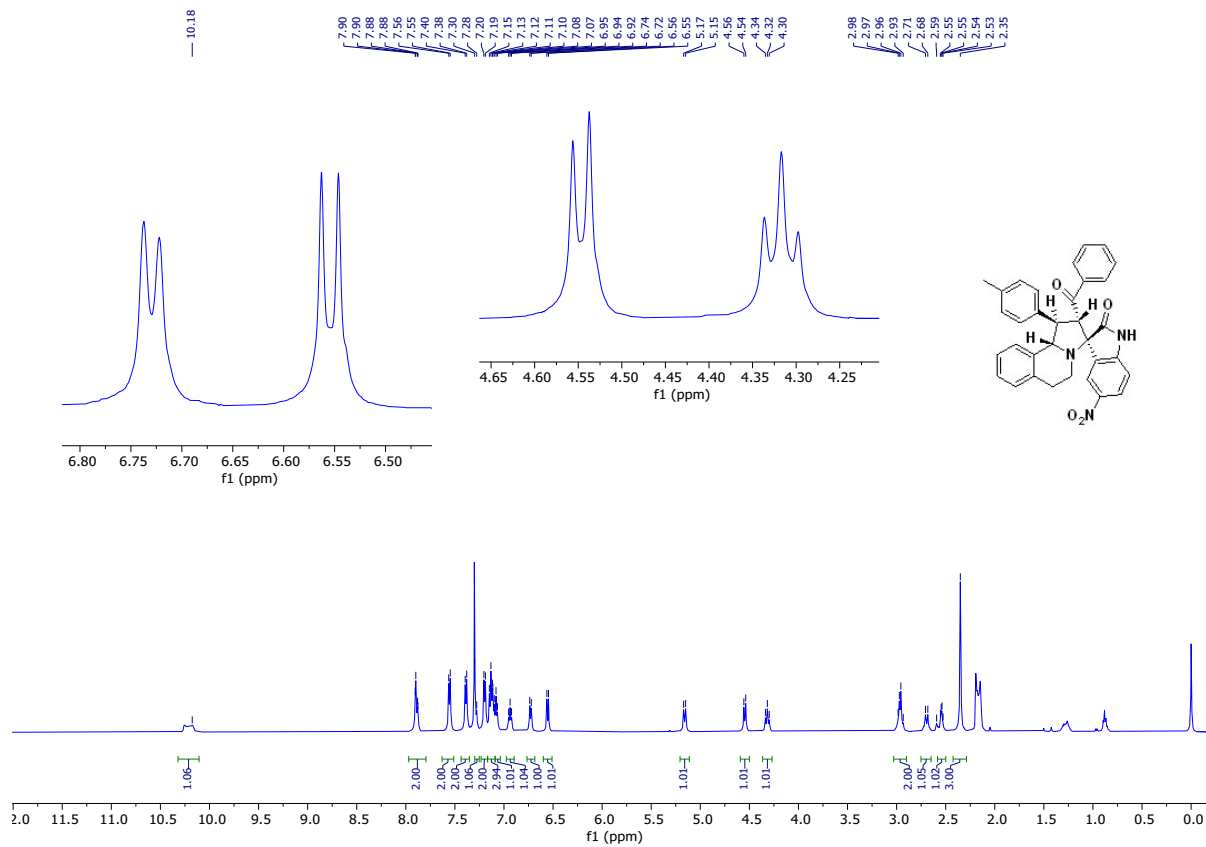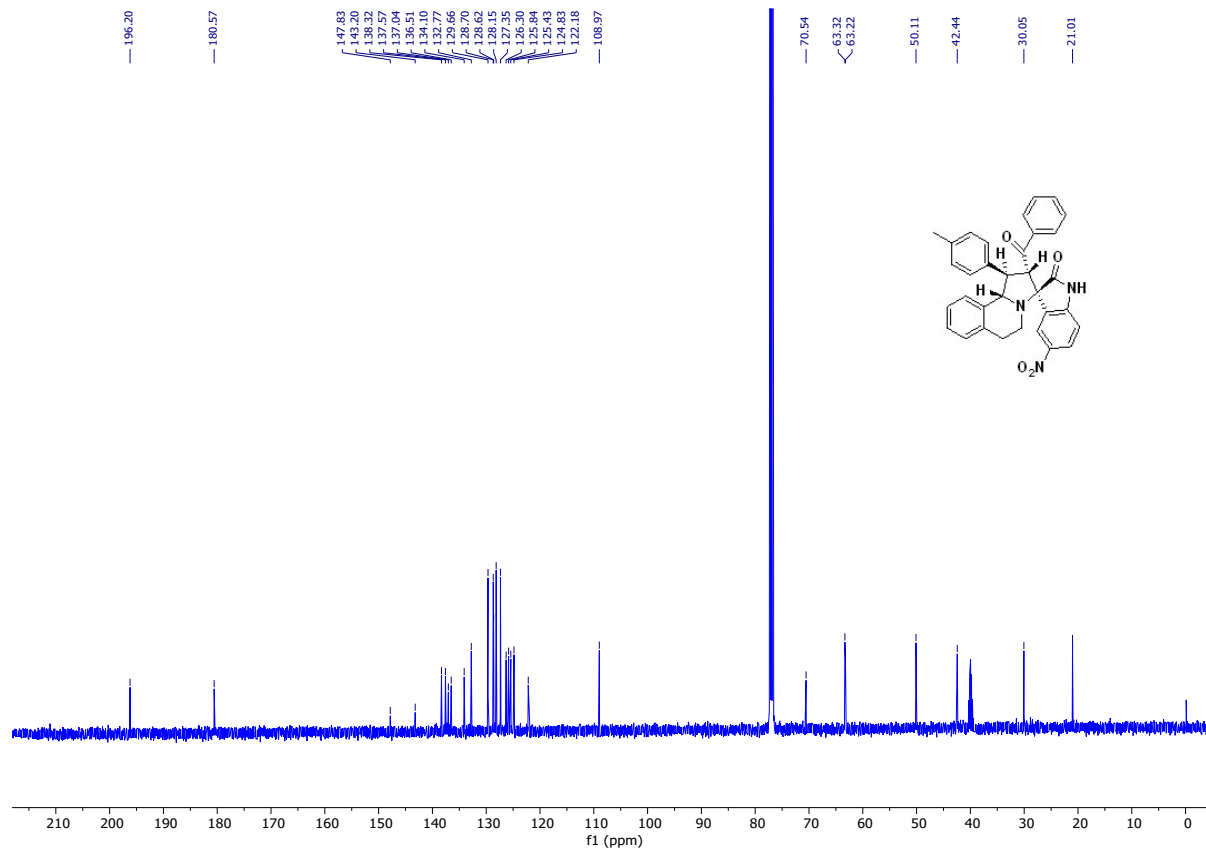

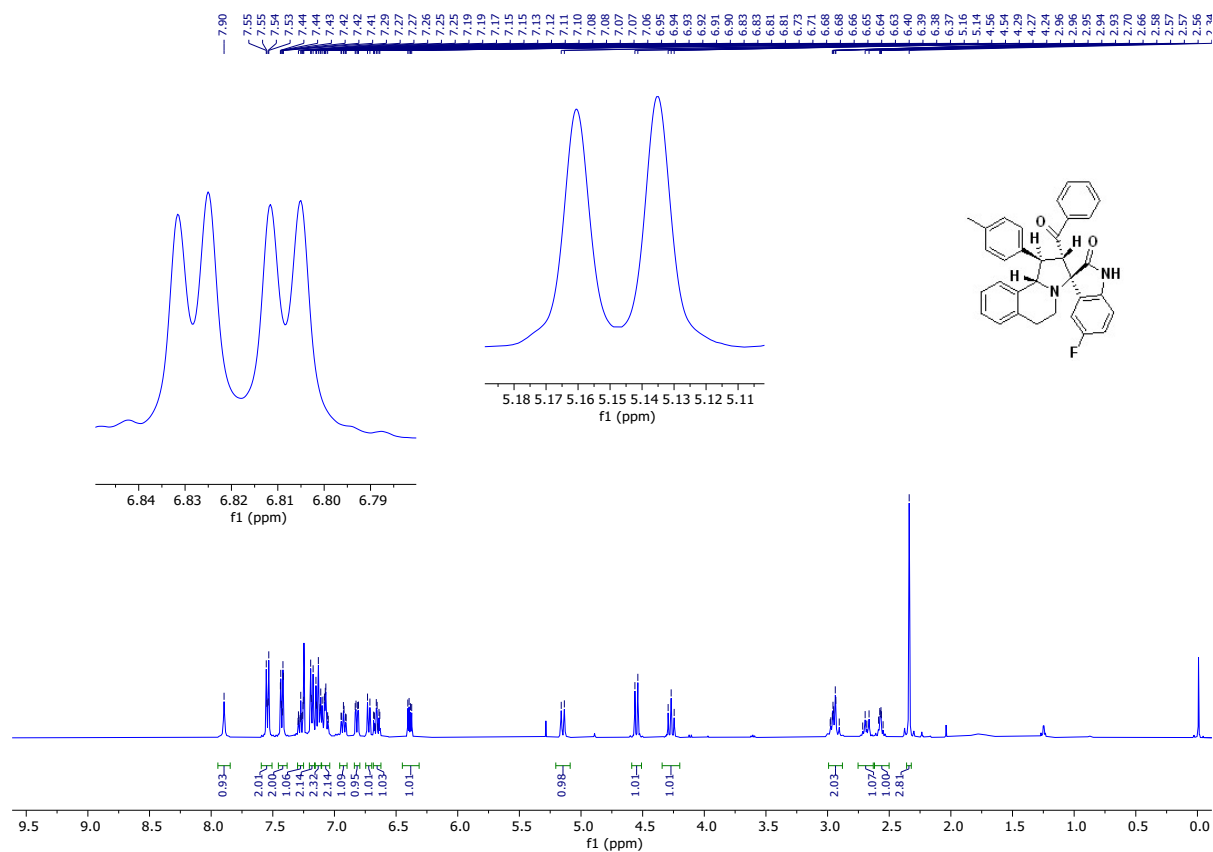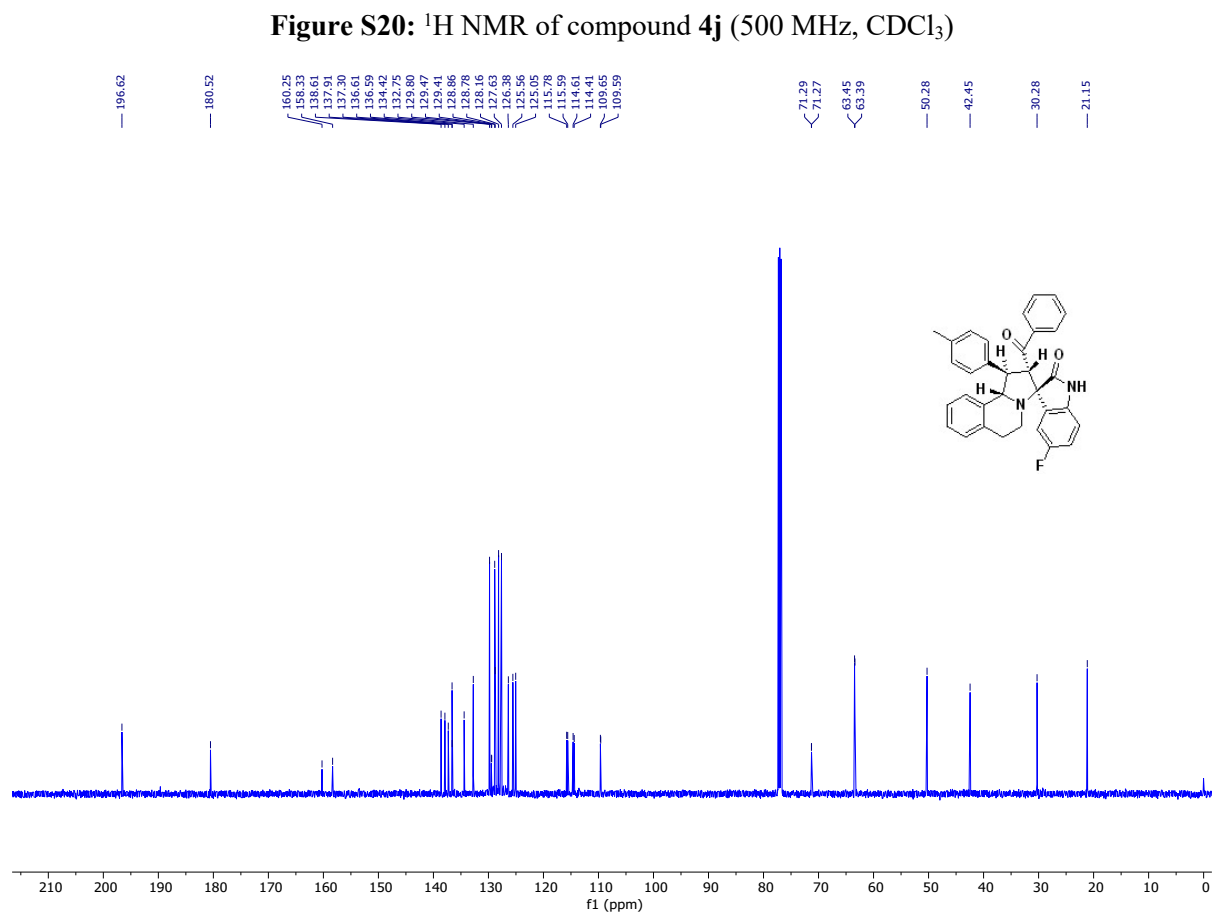

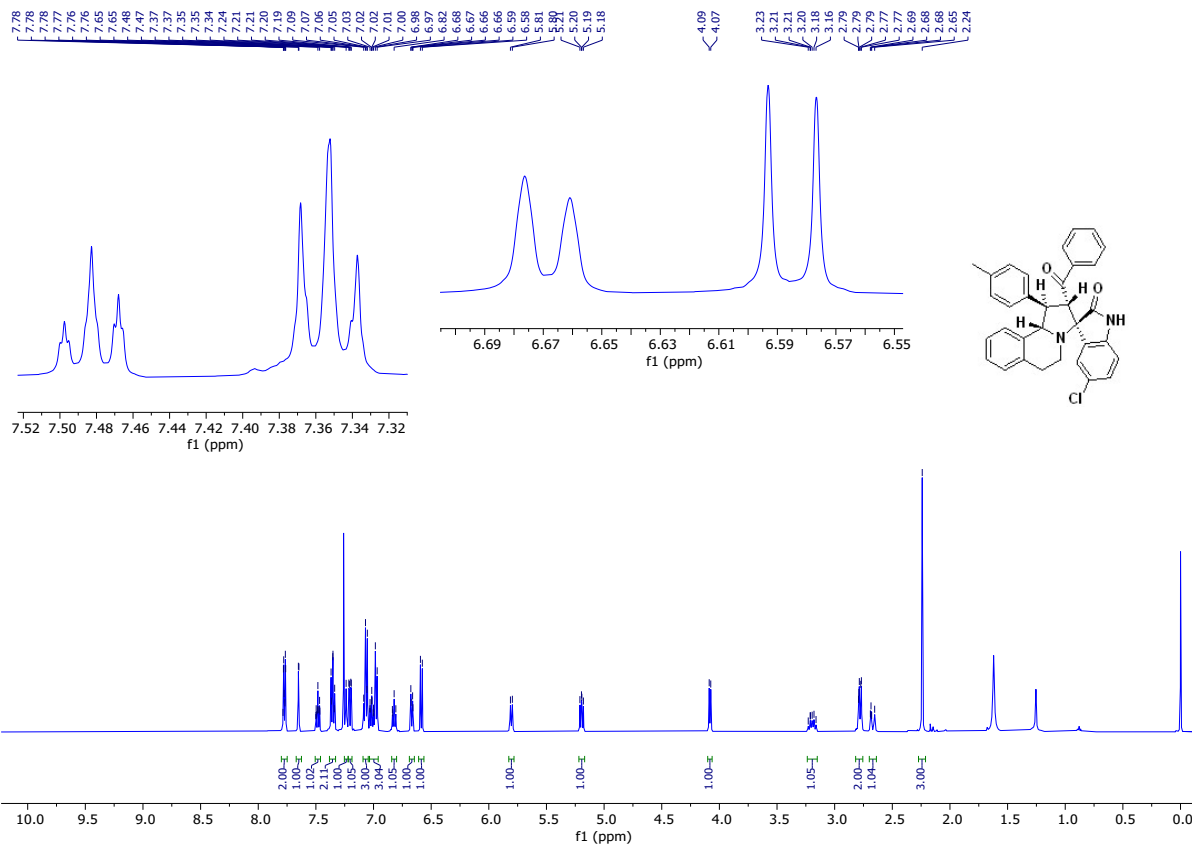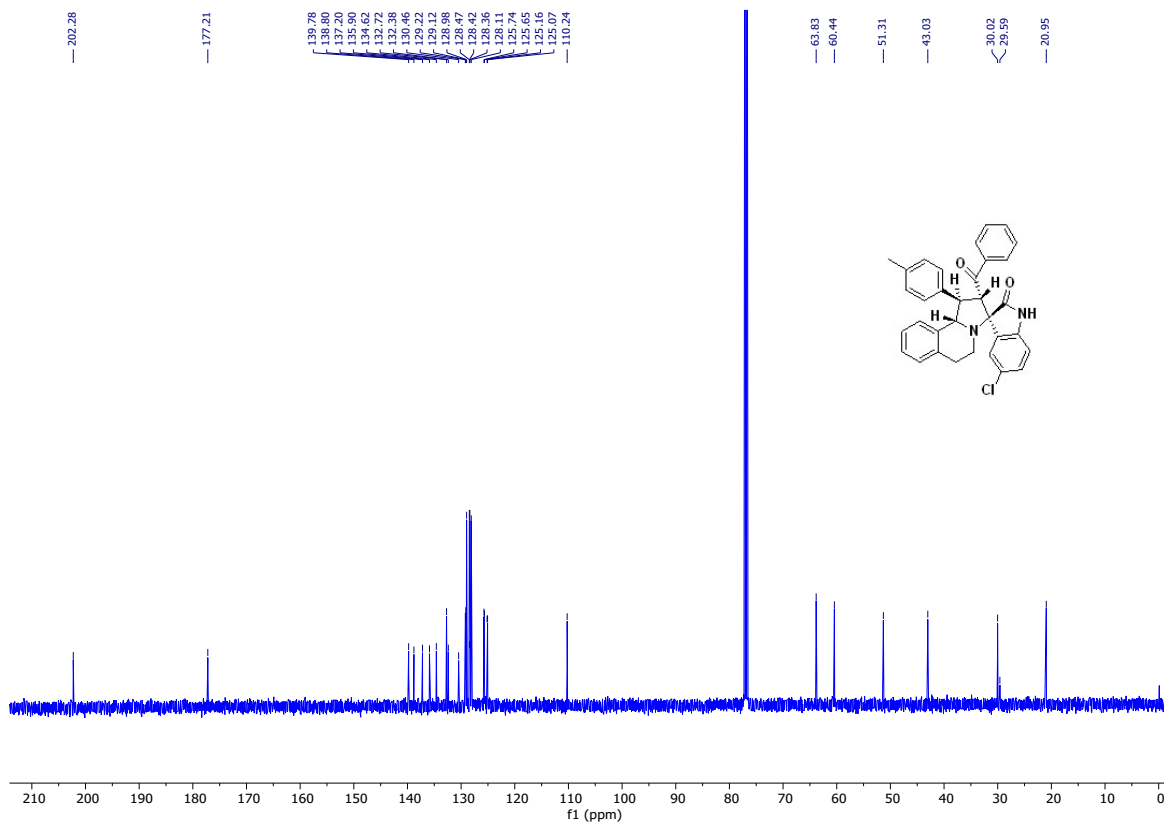

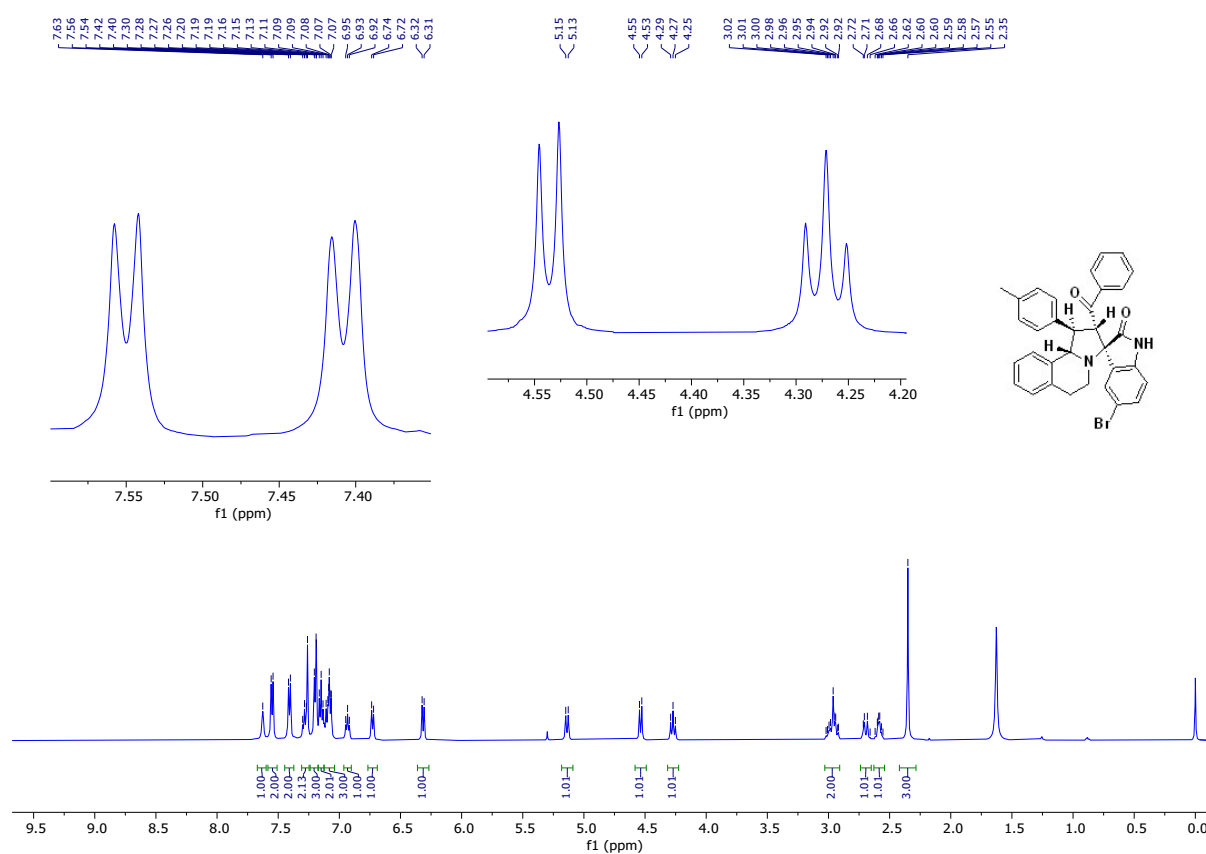

**Figure S24:  $^1\text{H}$  NMR of compound 4I (500 MHz,  $\text{CDCl}_3$ )**

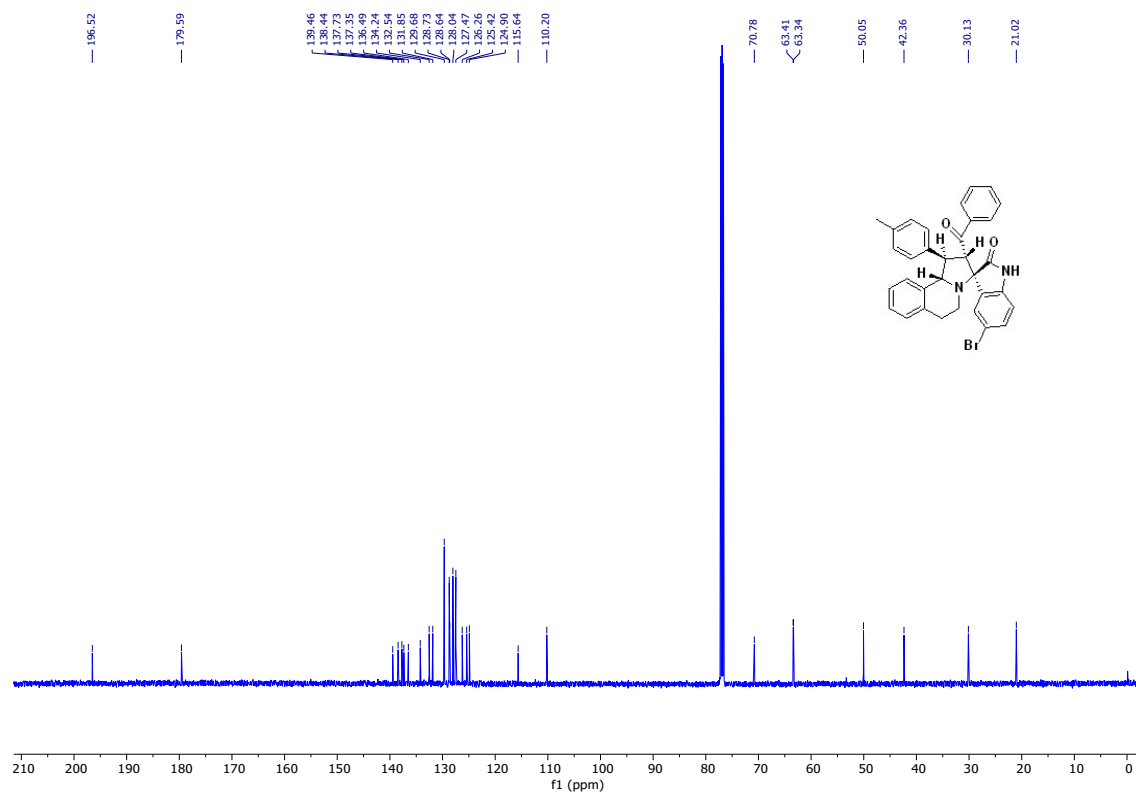

**Figure S25:  $^{13}\text{C}$  NMR of compound 4I (126 MHz,  $\text{CDCl}_3$ )**



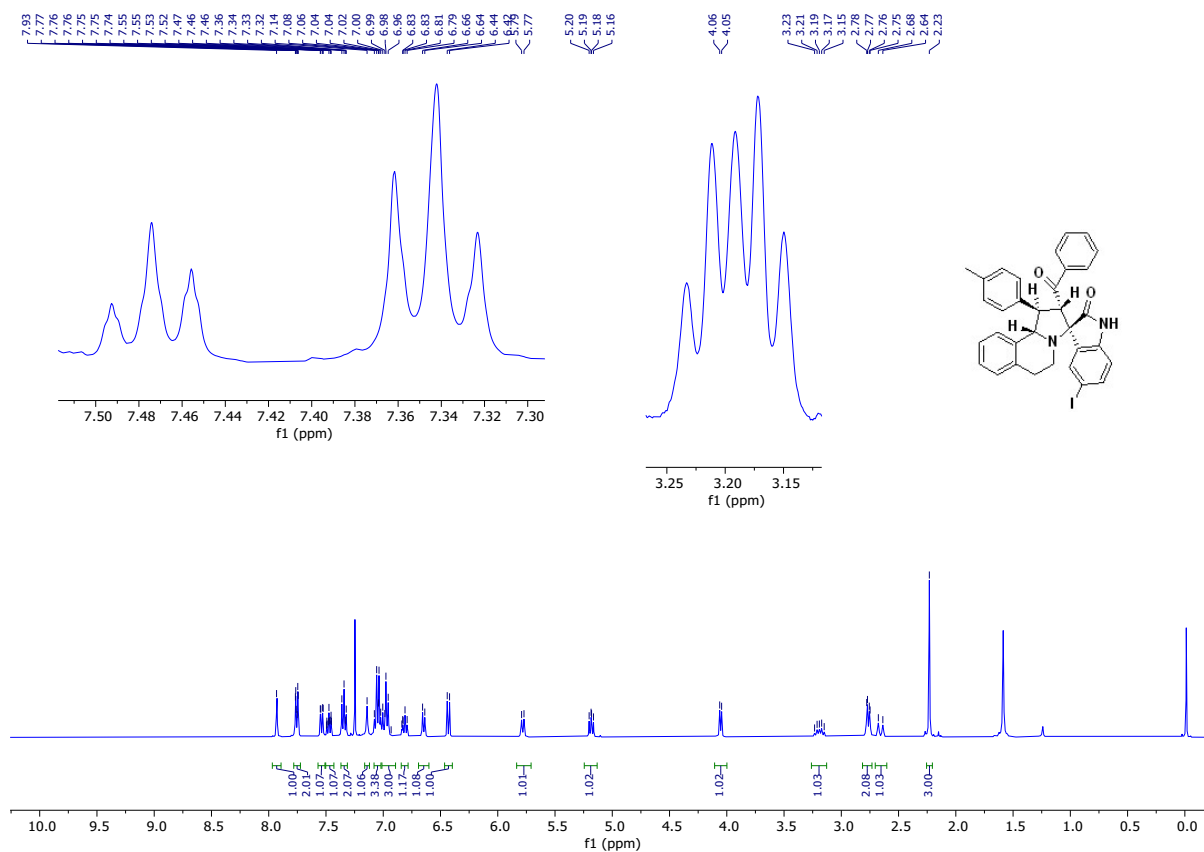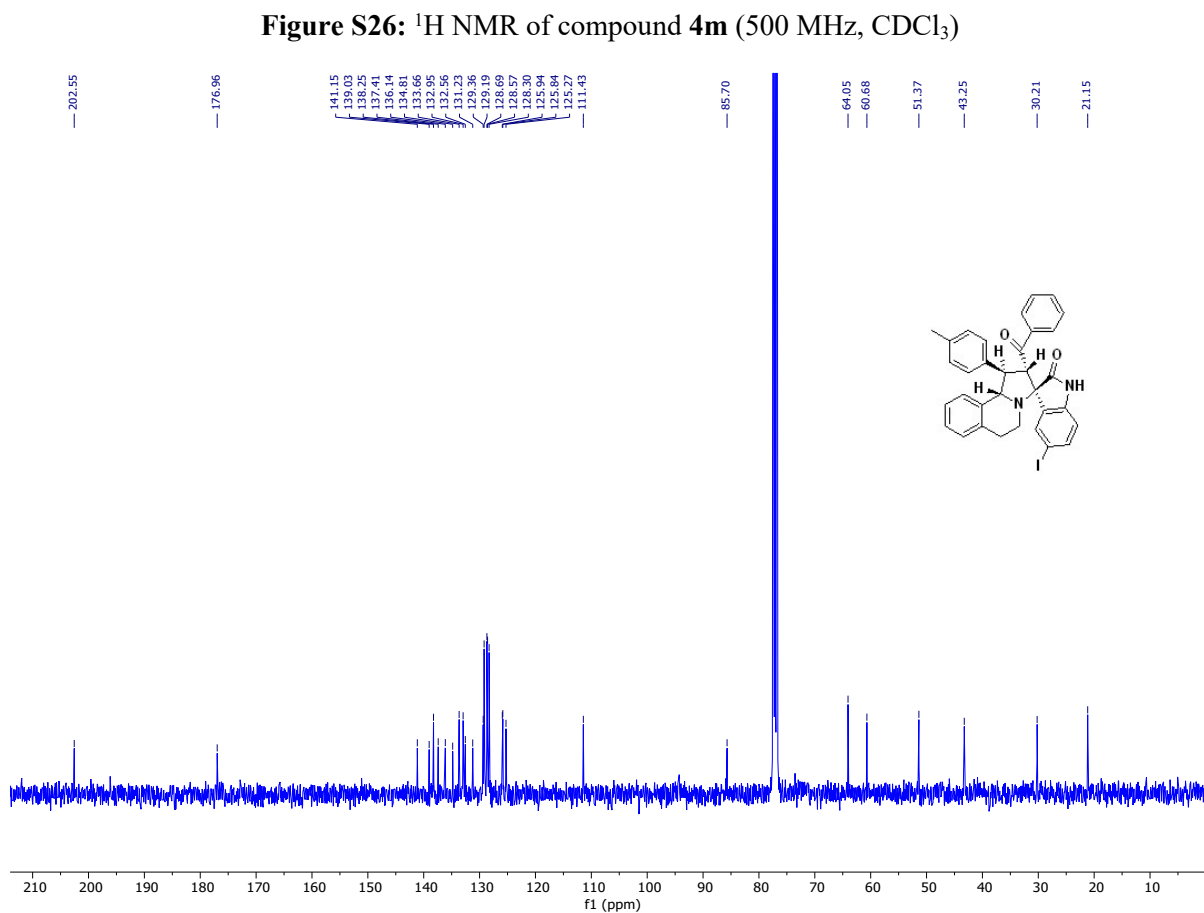

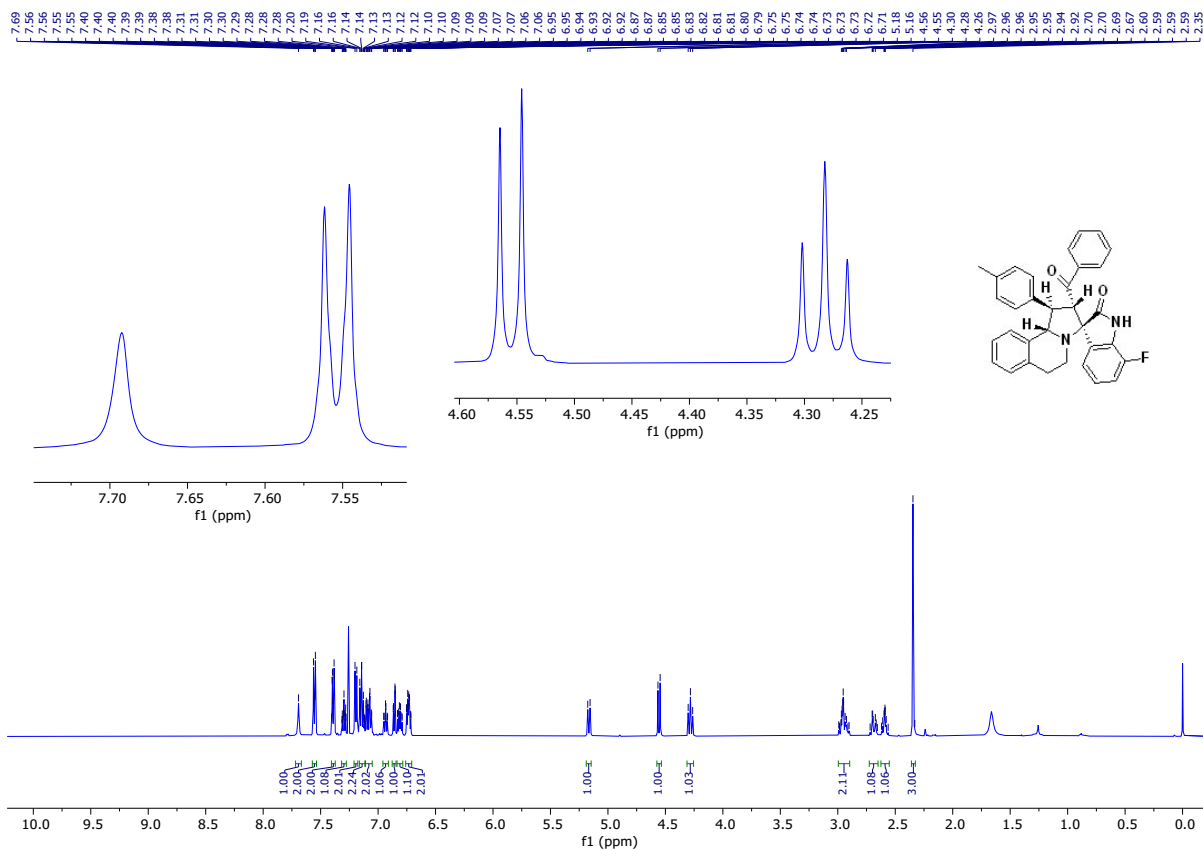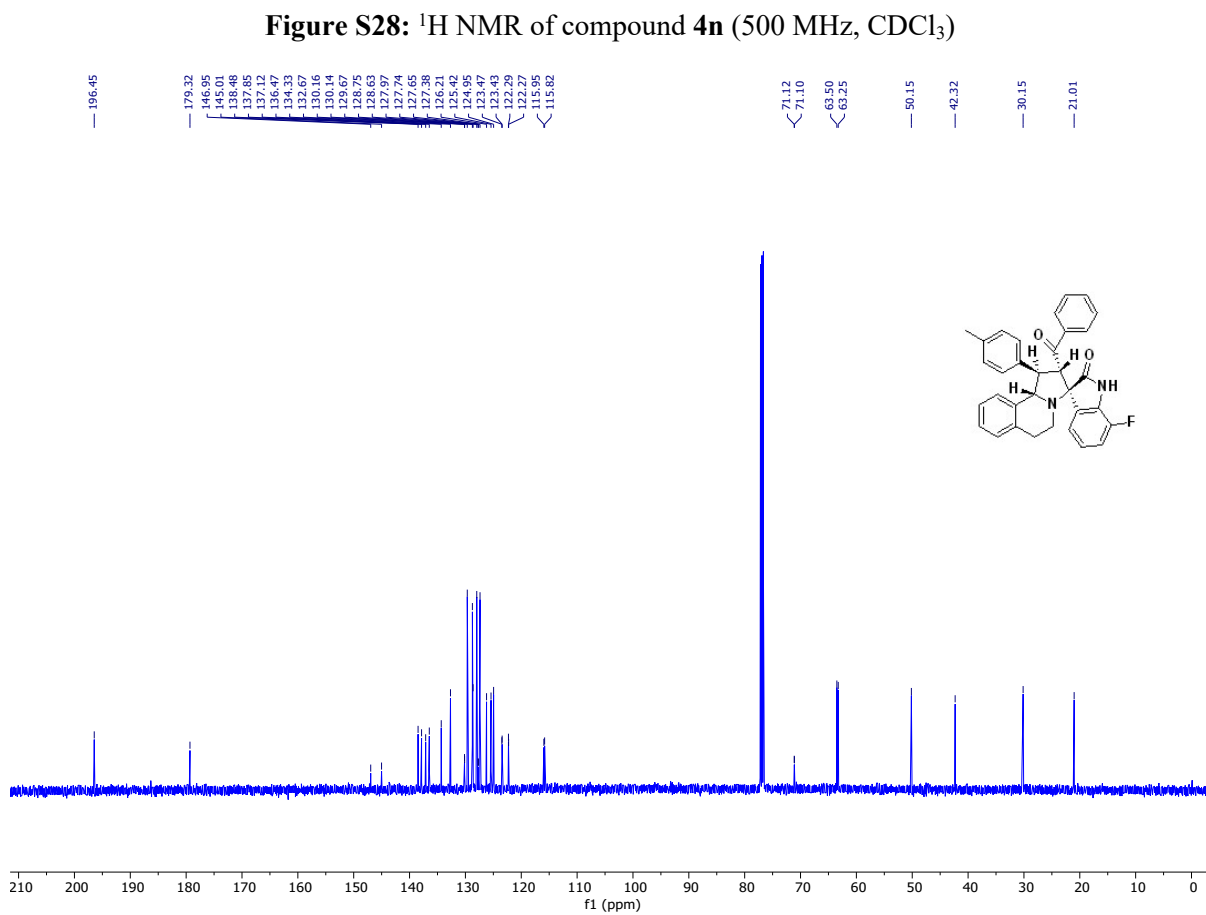

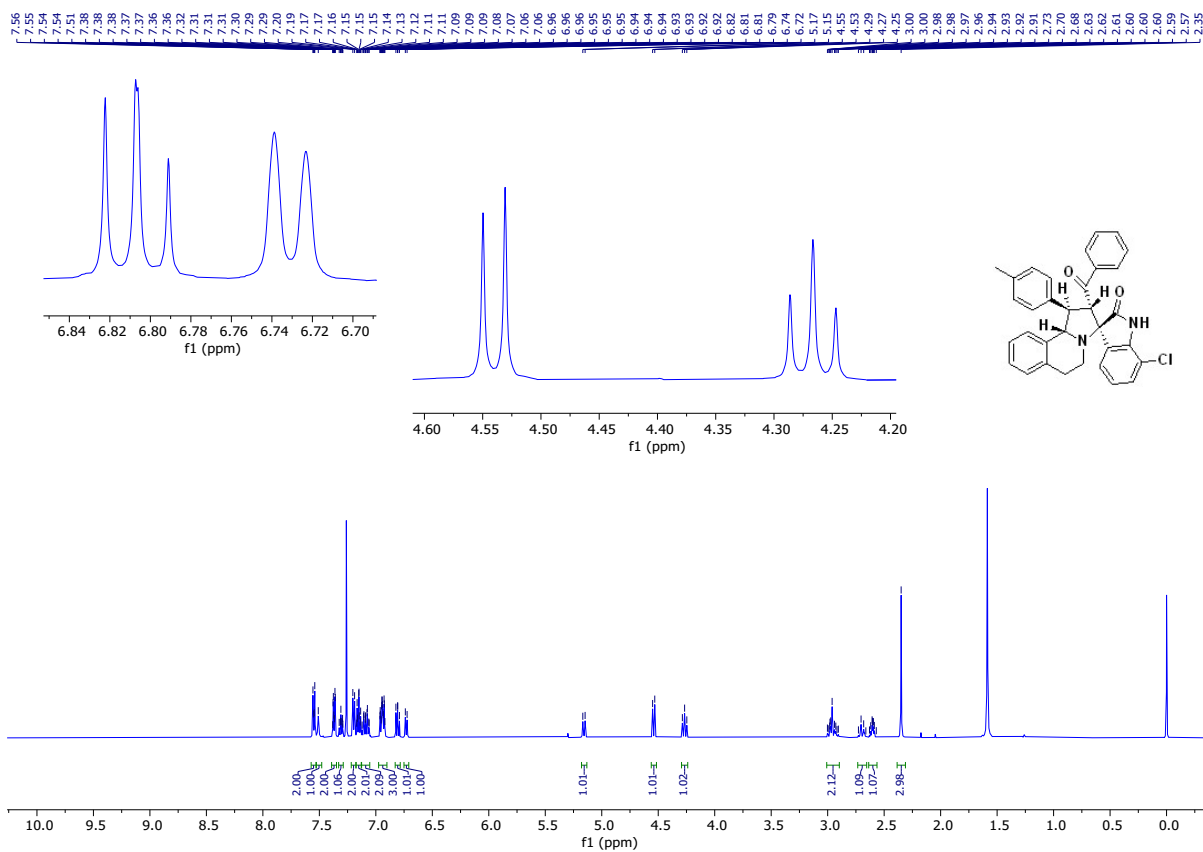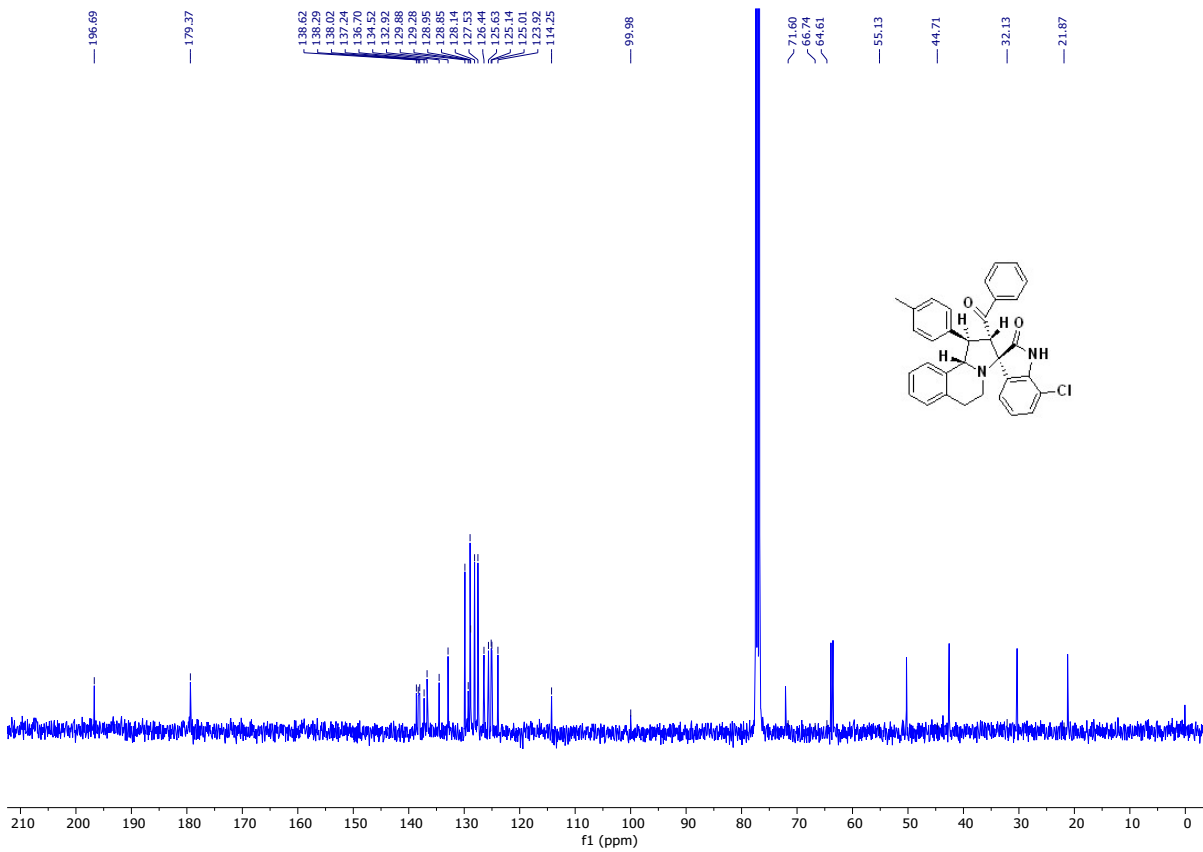

**Figure S31:  $^{13}\text{C}$  NMR of compound **4o** (126 MHz,  $\text{CDCl}_3$ )**

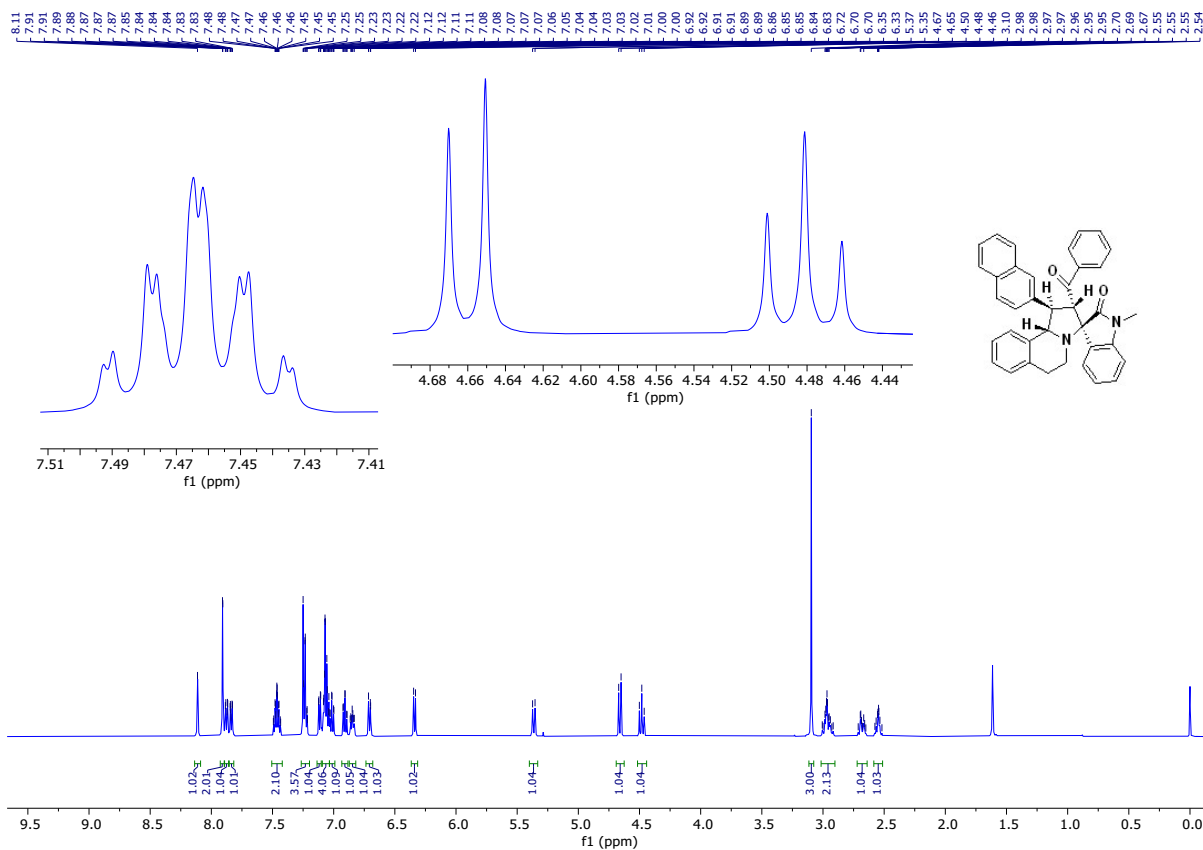

**Figure S32:  $^1\text{H}$  NMR of compound **4p** (500 MHz,  $\text{CDCl}_3$ )**

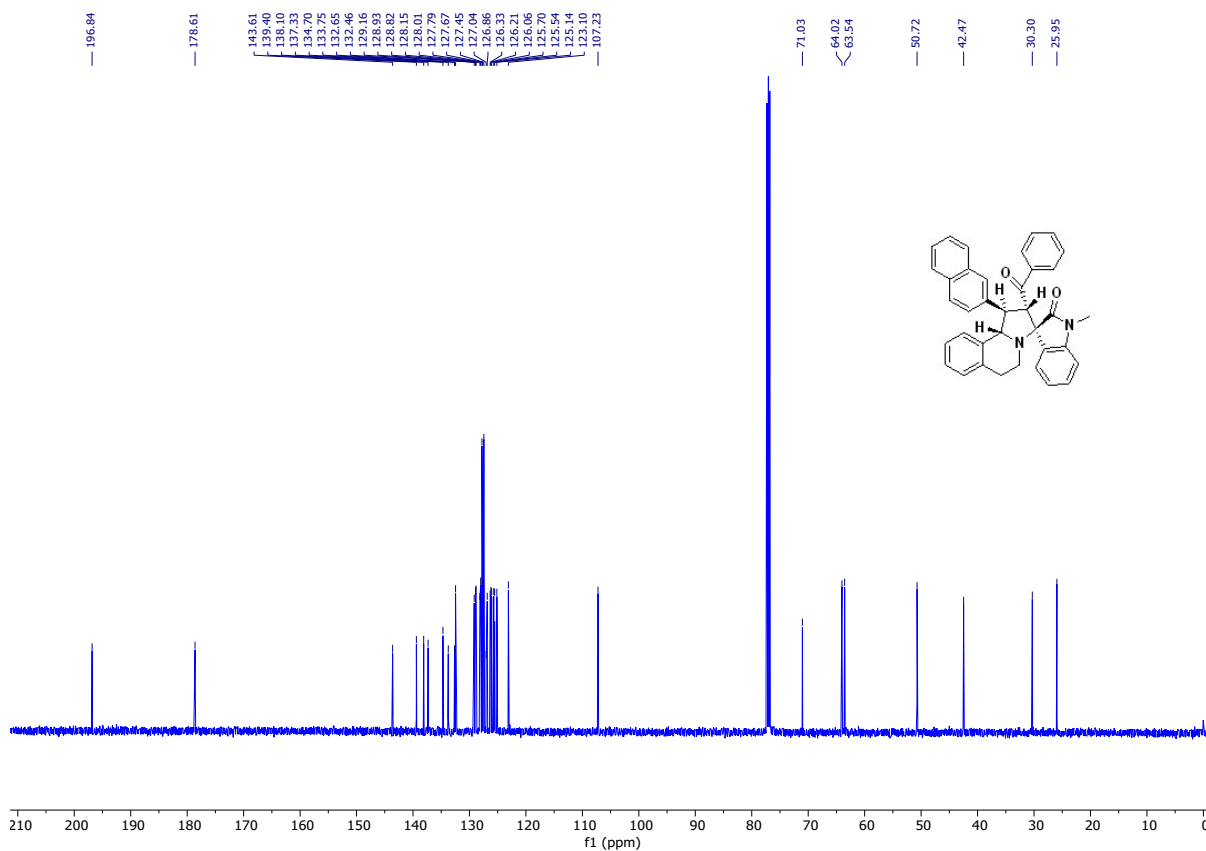

**Figure S33:  $^{13}\text{C}$  NMR of compound **4p** (126 MHz,  $\text{CDCl}_3$ )**

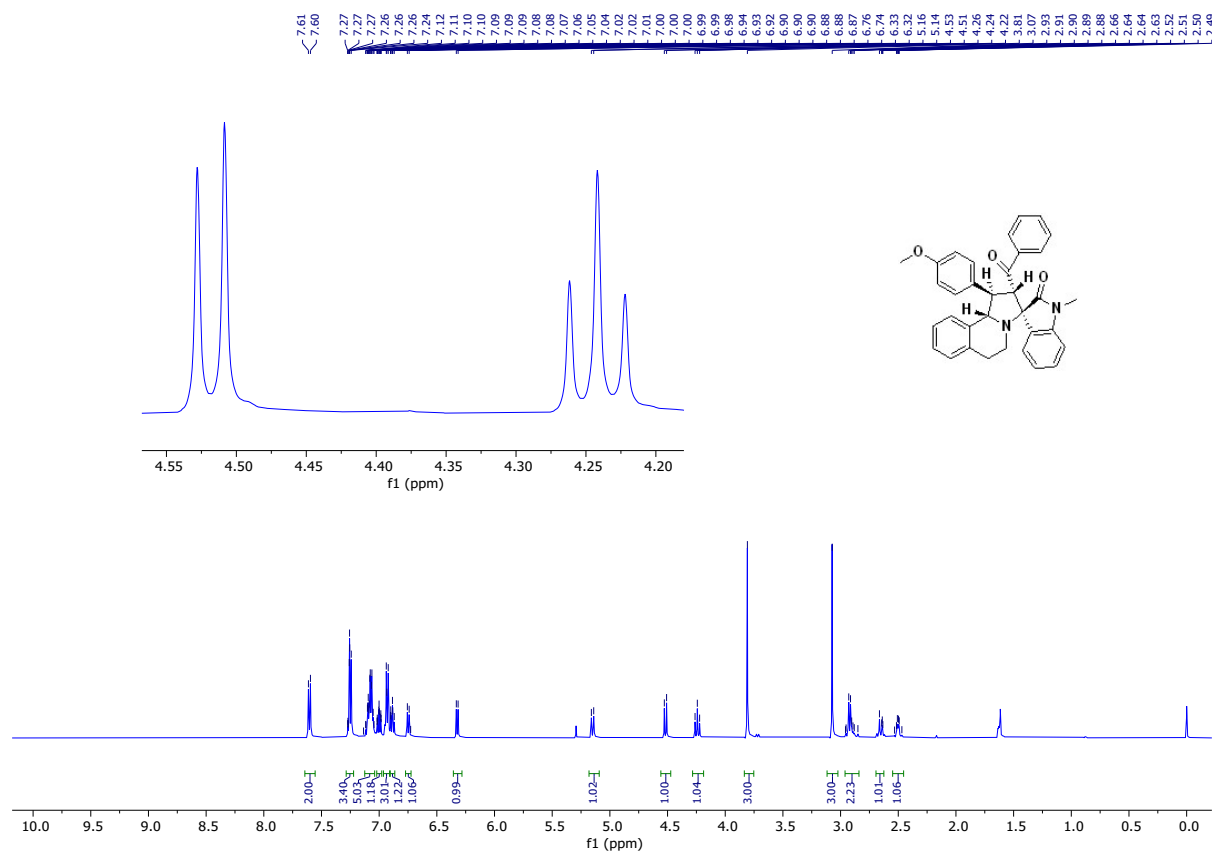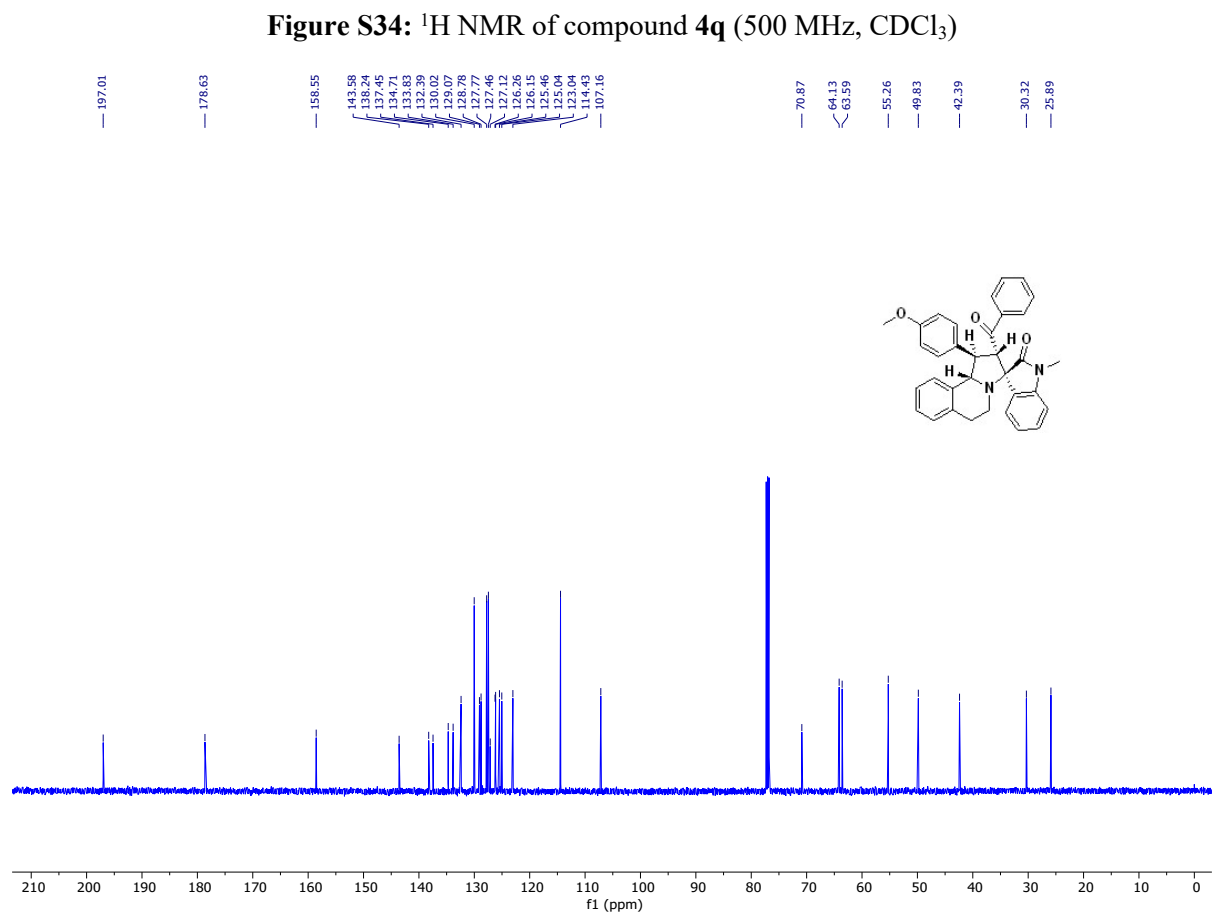

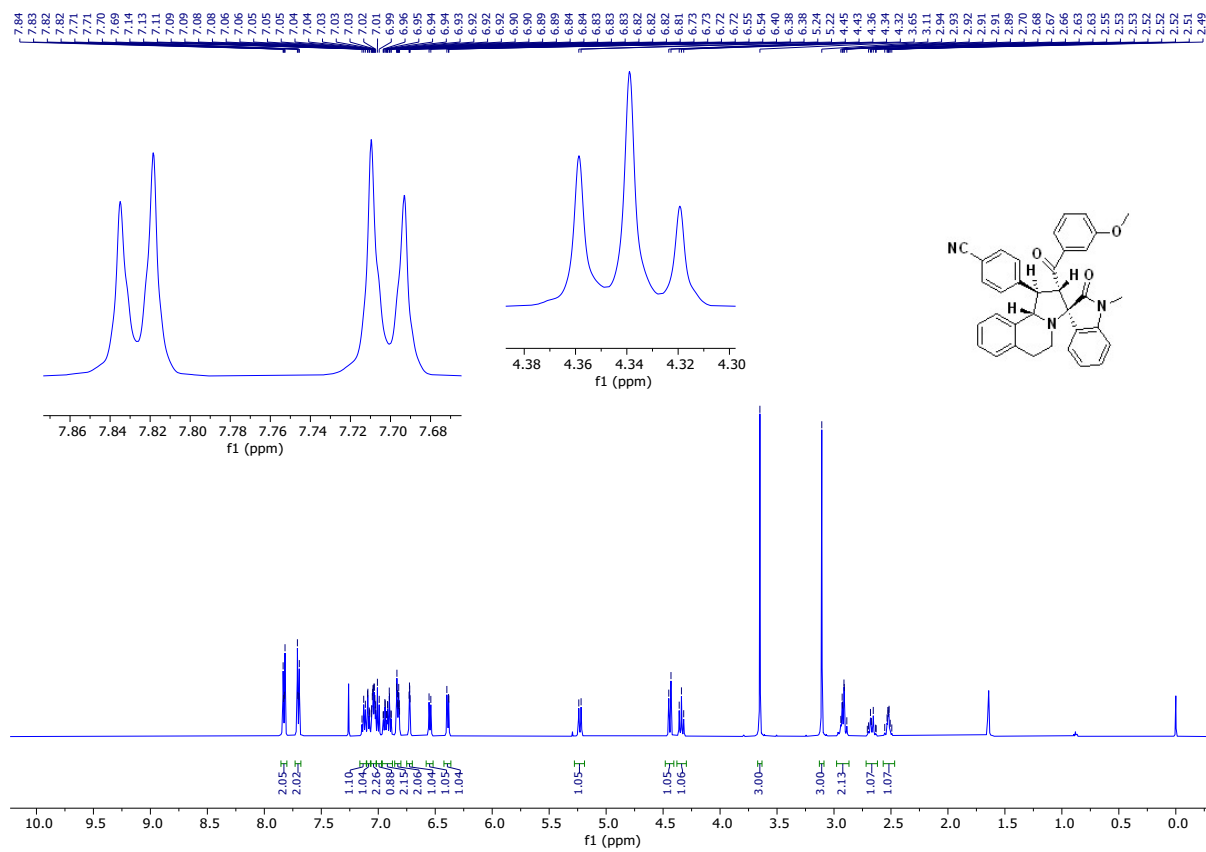

Figure S36:  $^1\text{H}$  NMR of compound **4r** (500 MHz,  $\text{CDCl}_3$ )

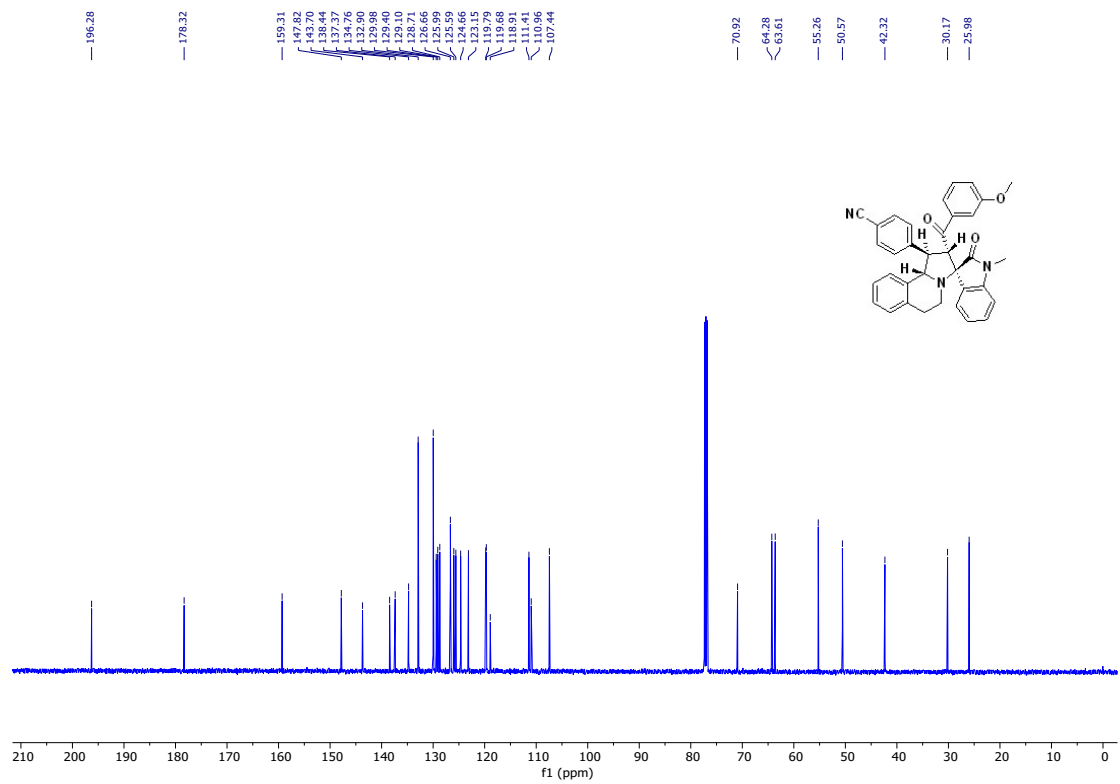

Figure S37:  $^{13}\text{C}$  NMR of compound **4r** (126 MHz,  $\text{CDCl}_3$ )

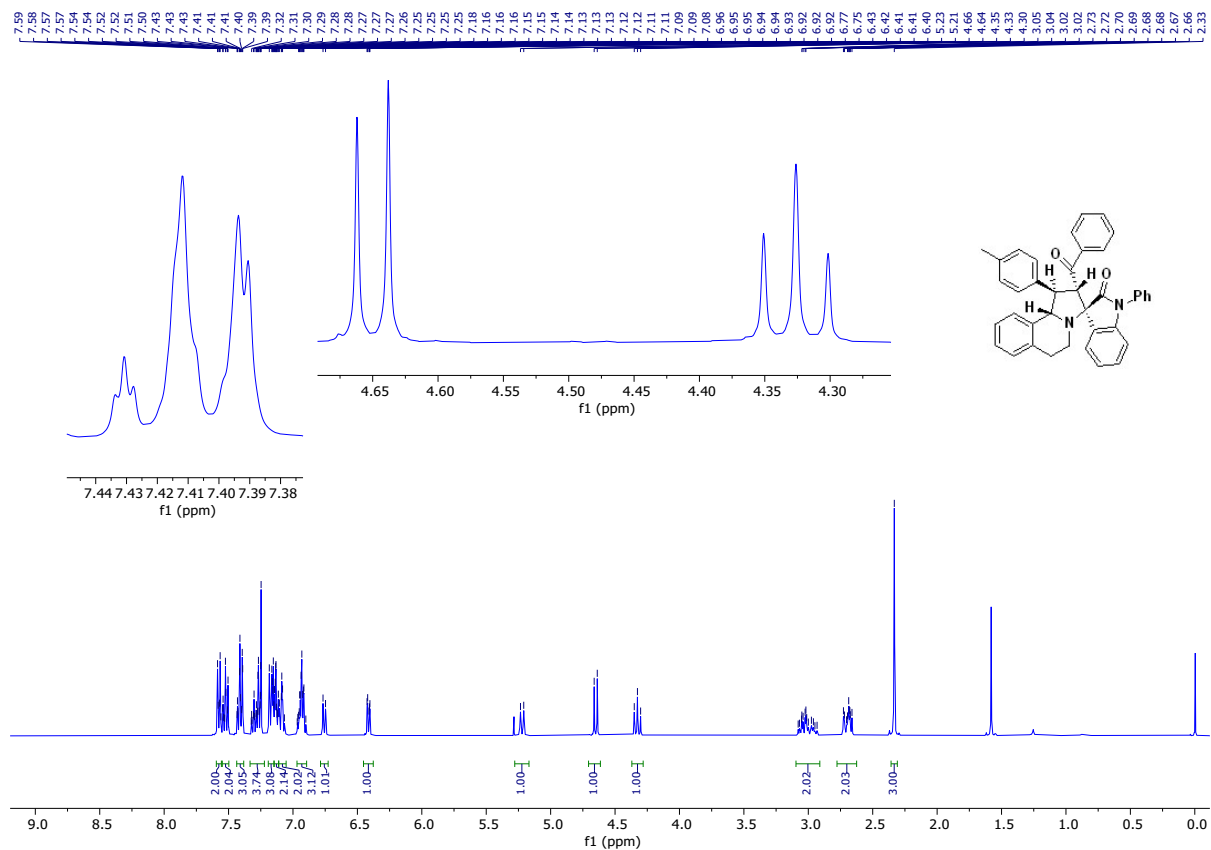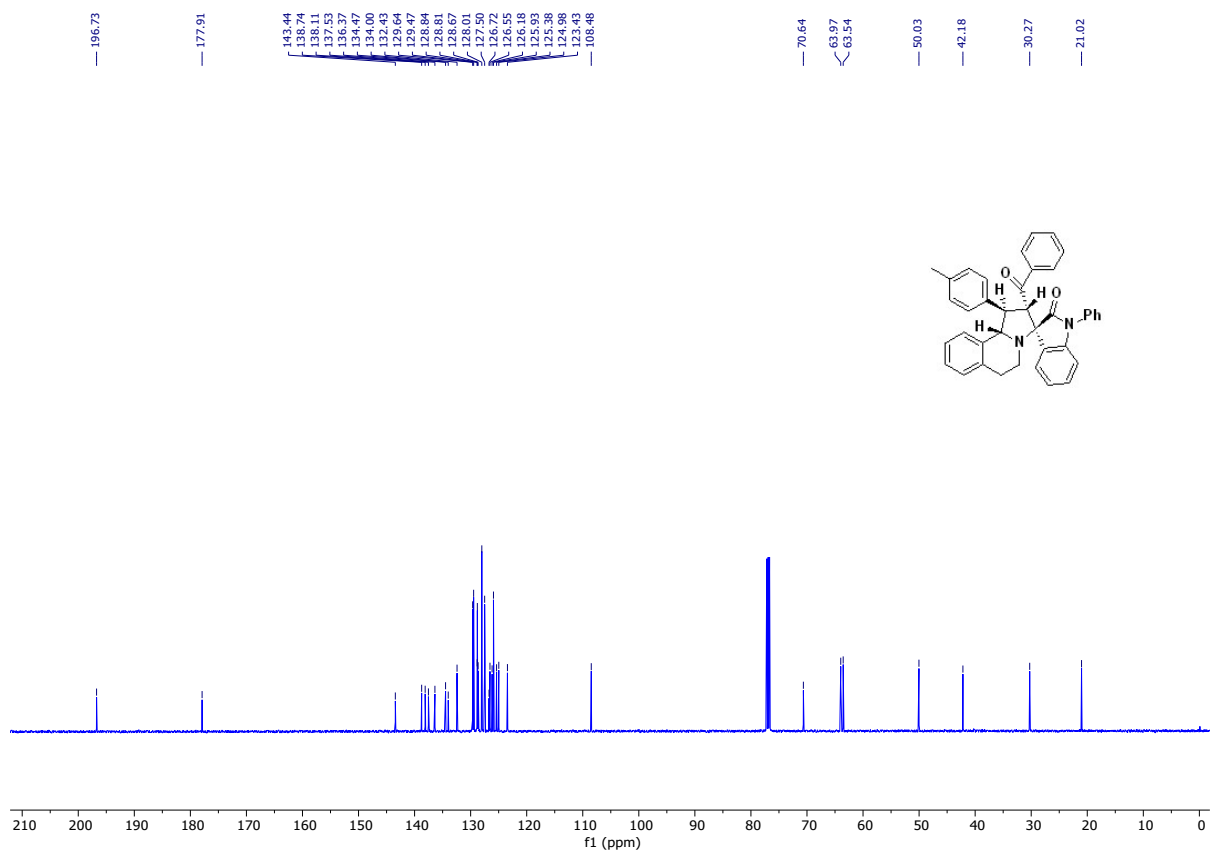

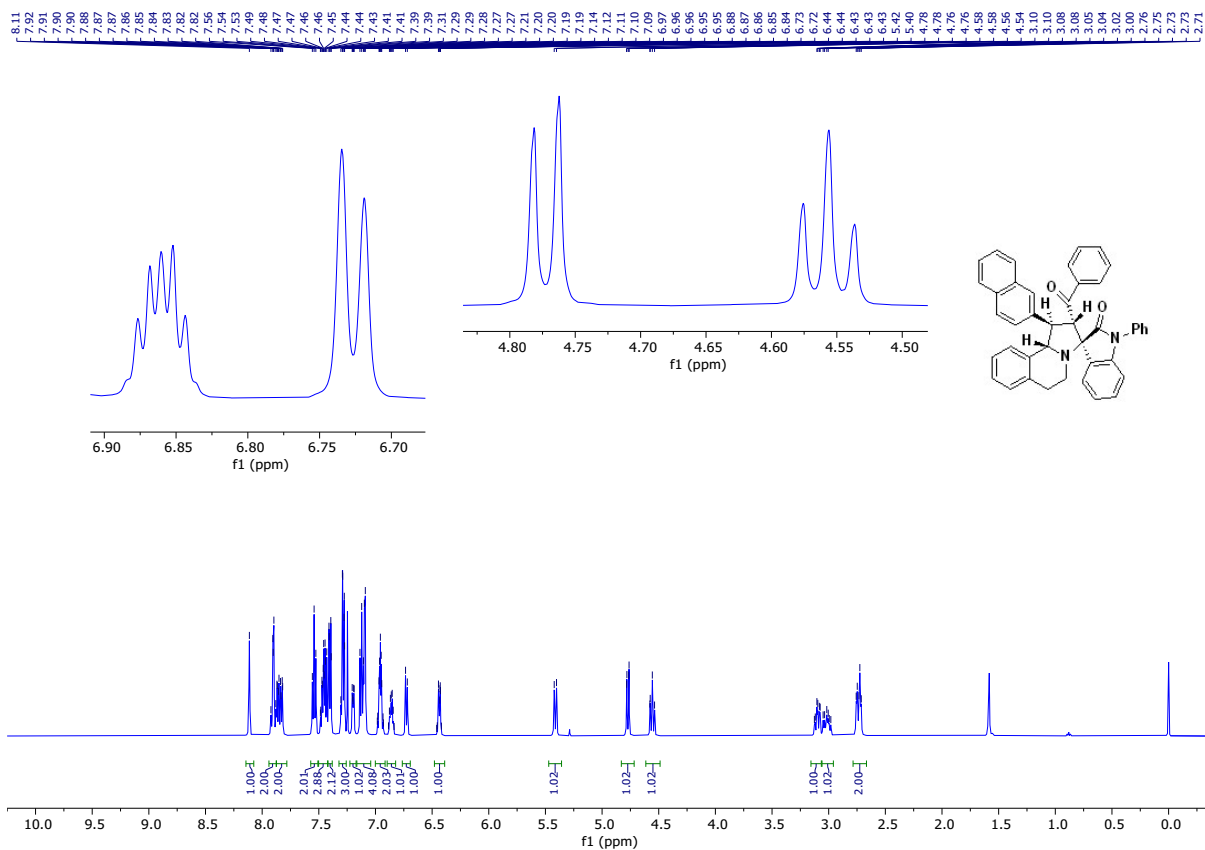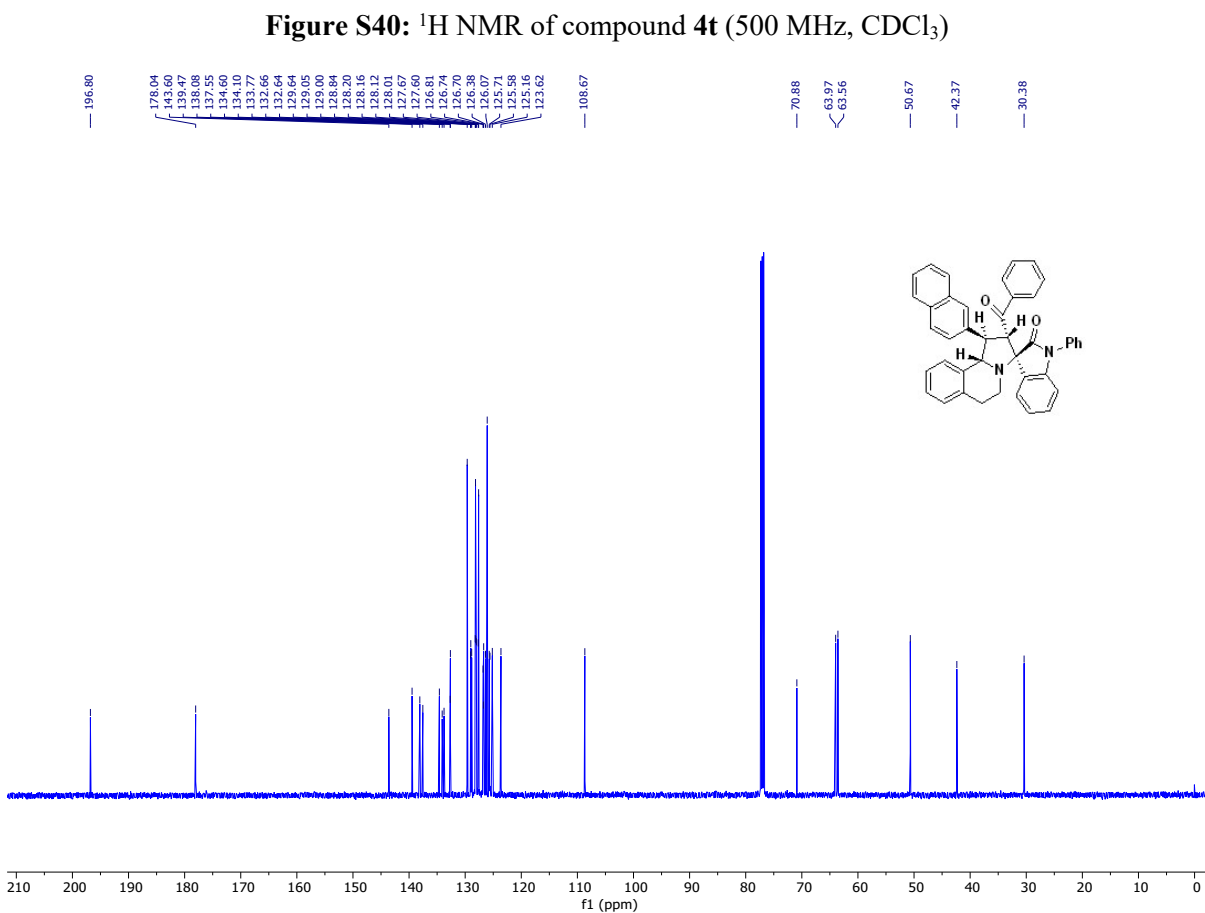



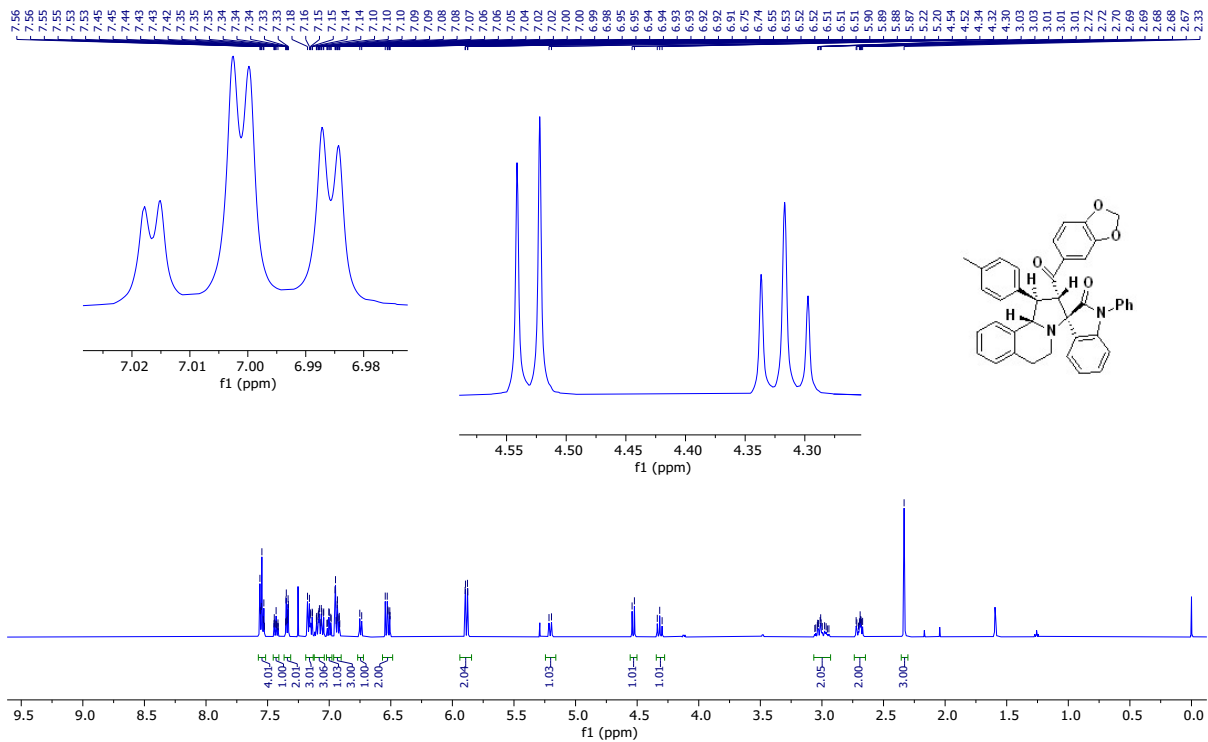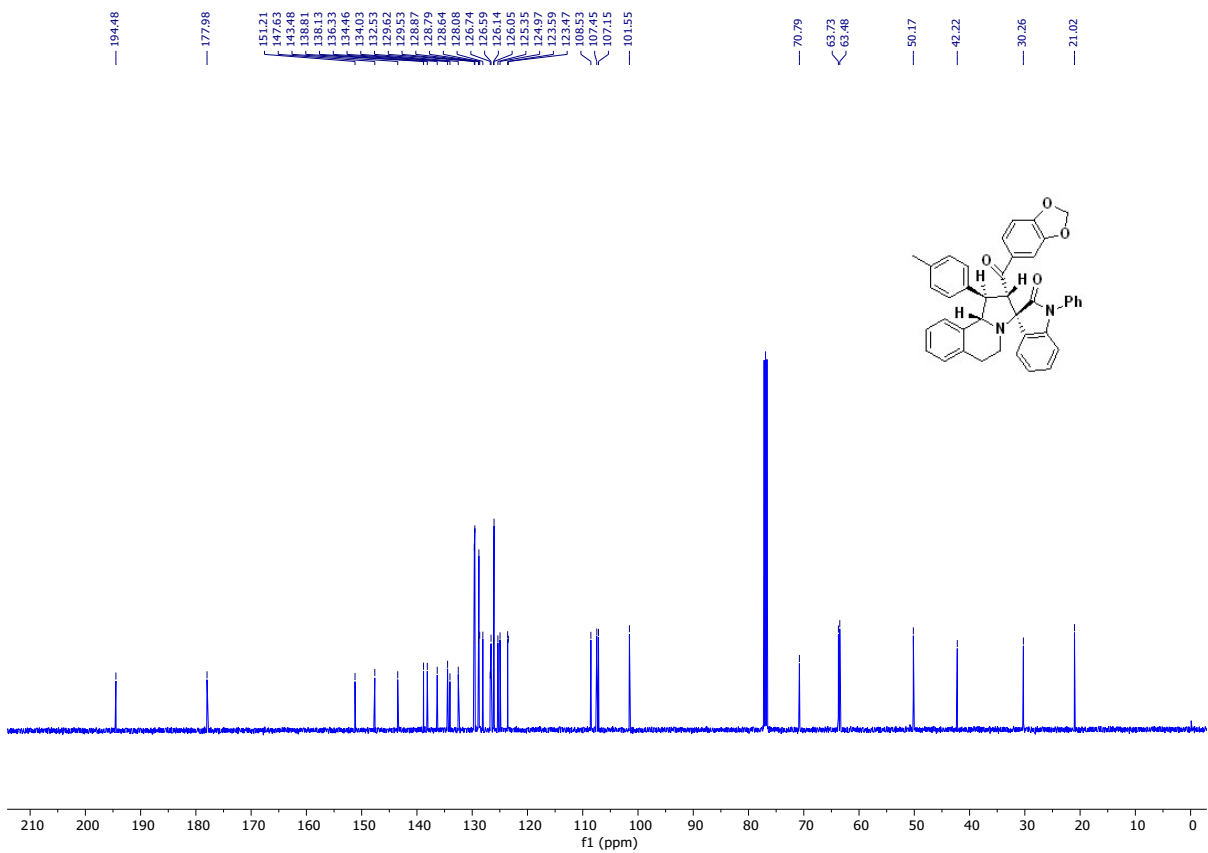

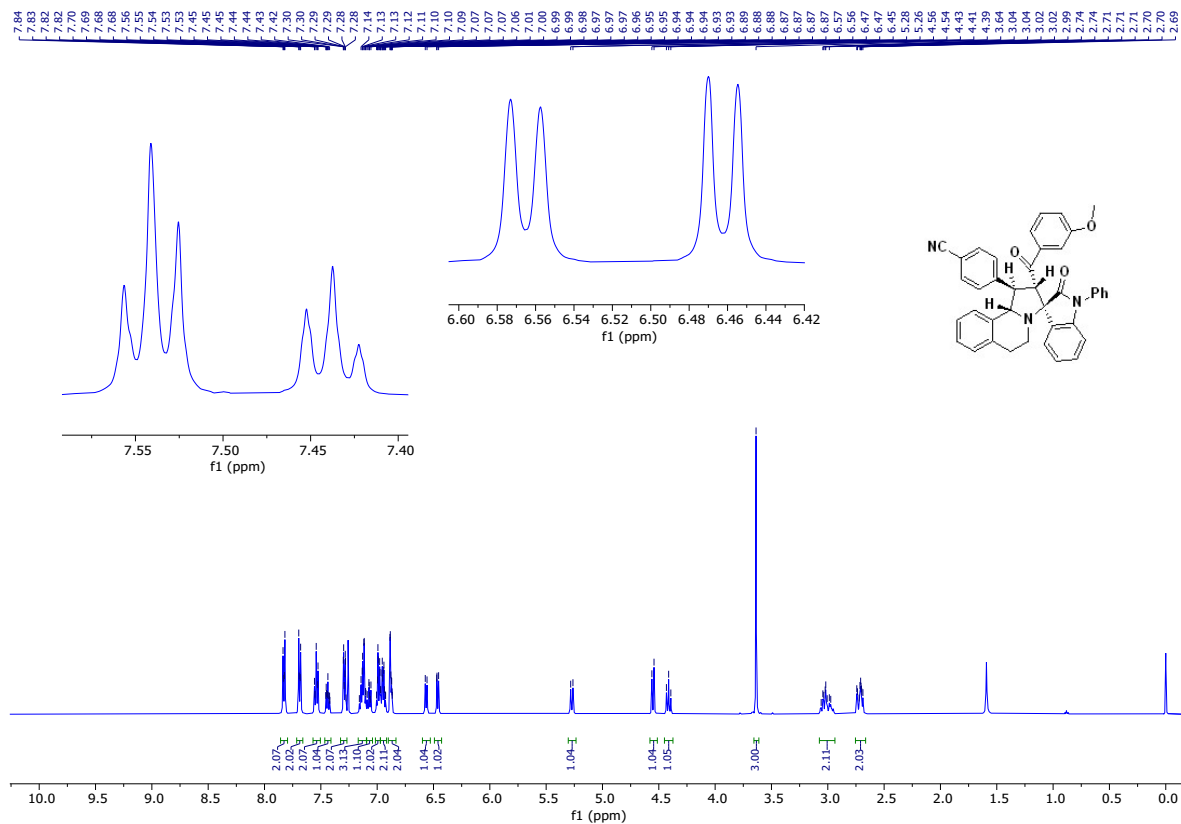

**Figure S44:  $^1\text{H}$  NMR of compound 4v (500 MHz,  $\text{CDCl}_3$ )**

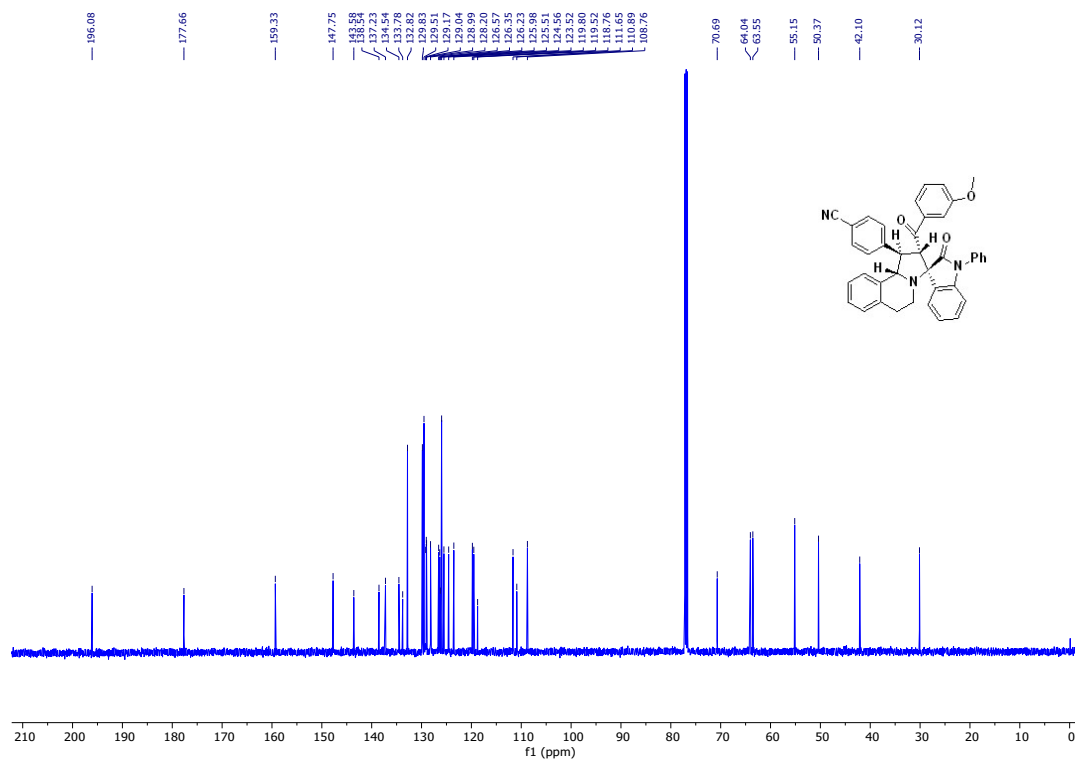

**Figure S45:  $^{13}\text{C}$  NMR of compound 4v (126 MHz,  $\text{CDCl}_3$ )**

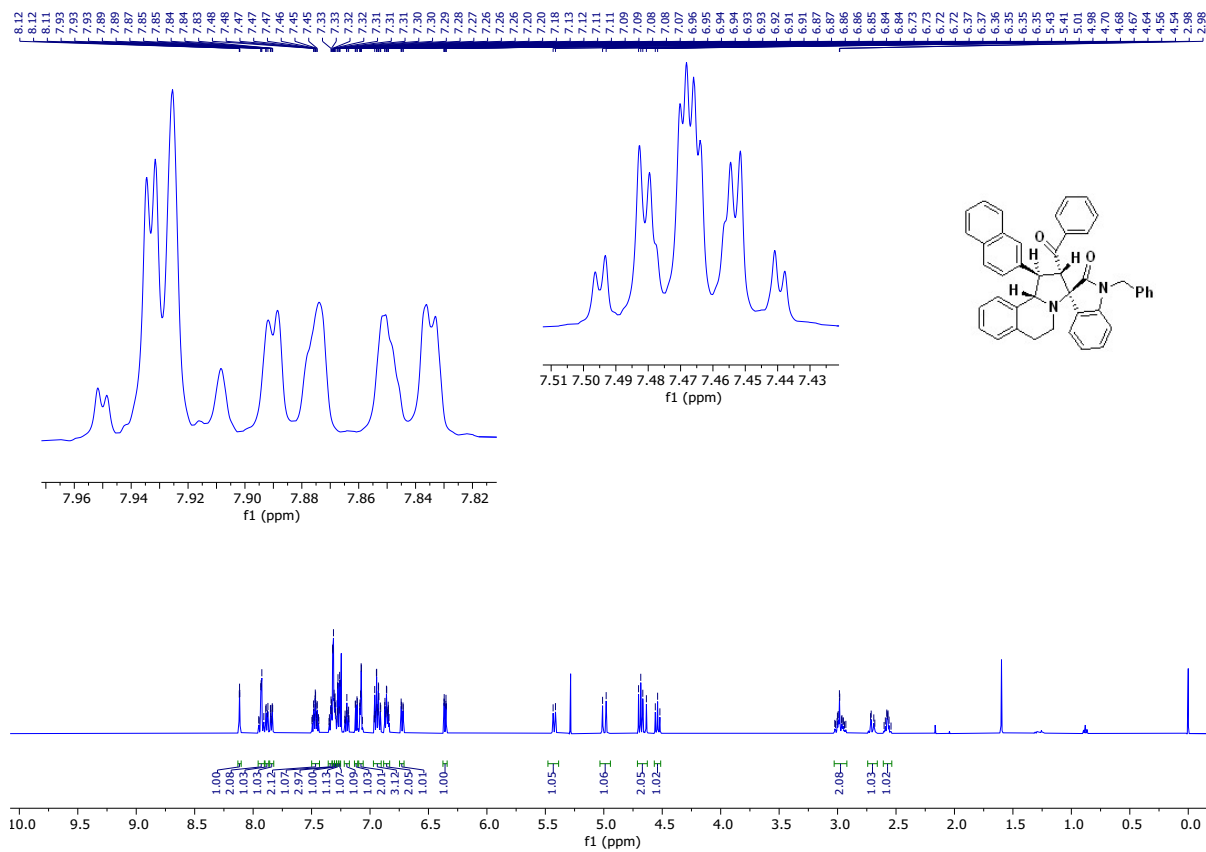

Figure S46:  $^1\text{H}$  NMR of compound **4w** (500 MHz,  $\text{CDCl}_3$ )

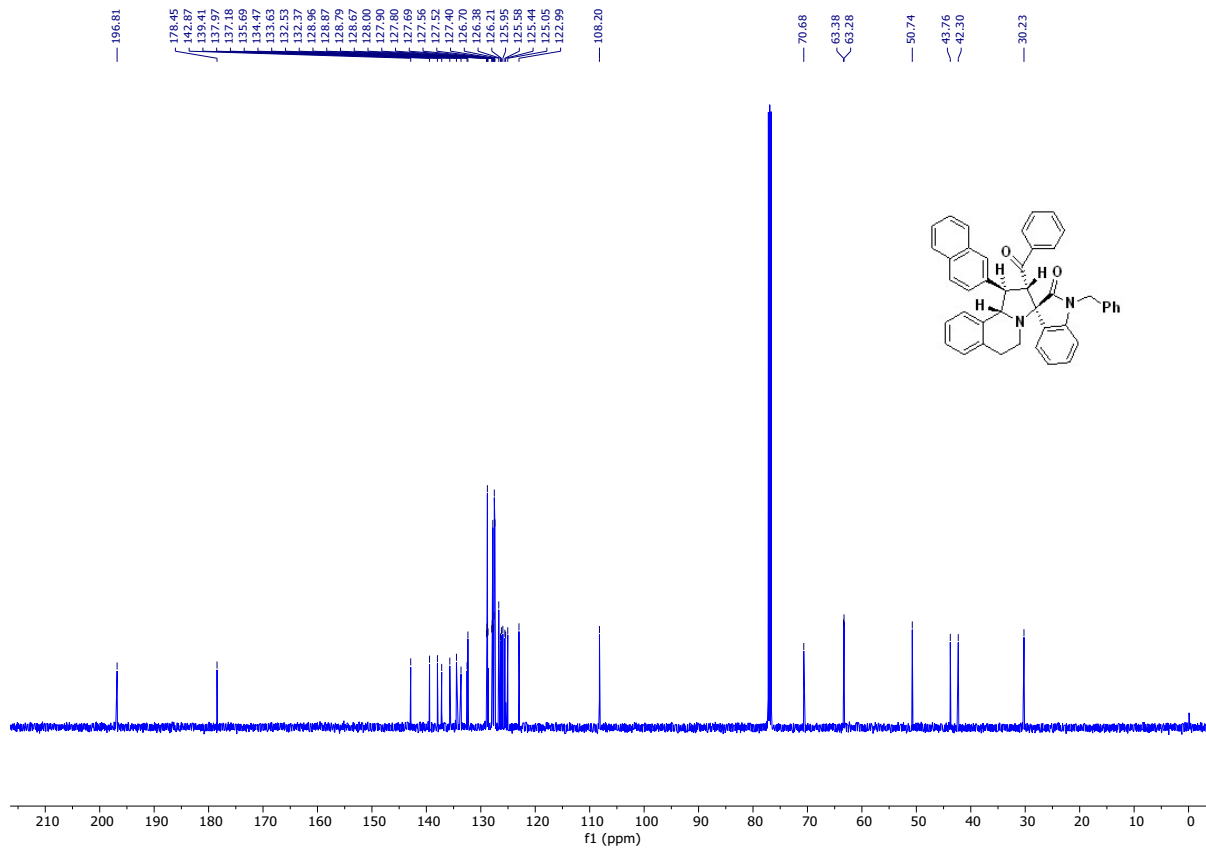

Figure S47:  $^{13}\text{C}$  NMR of compound **4w** (126 MHz,  $\text{CDCl}_3$ )

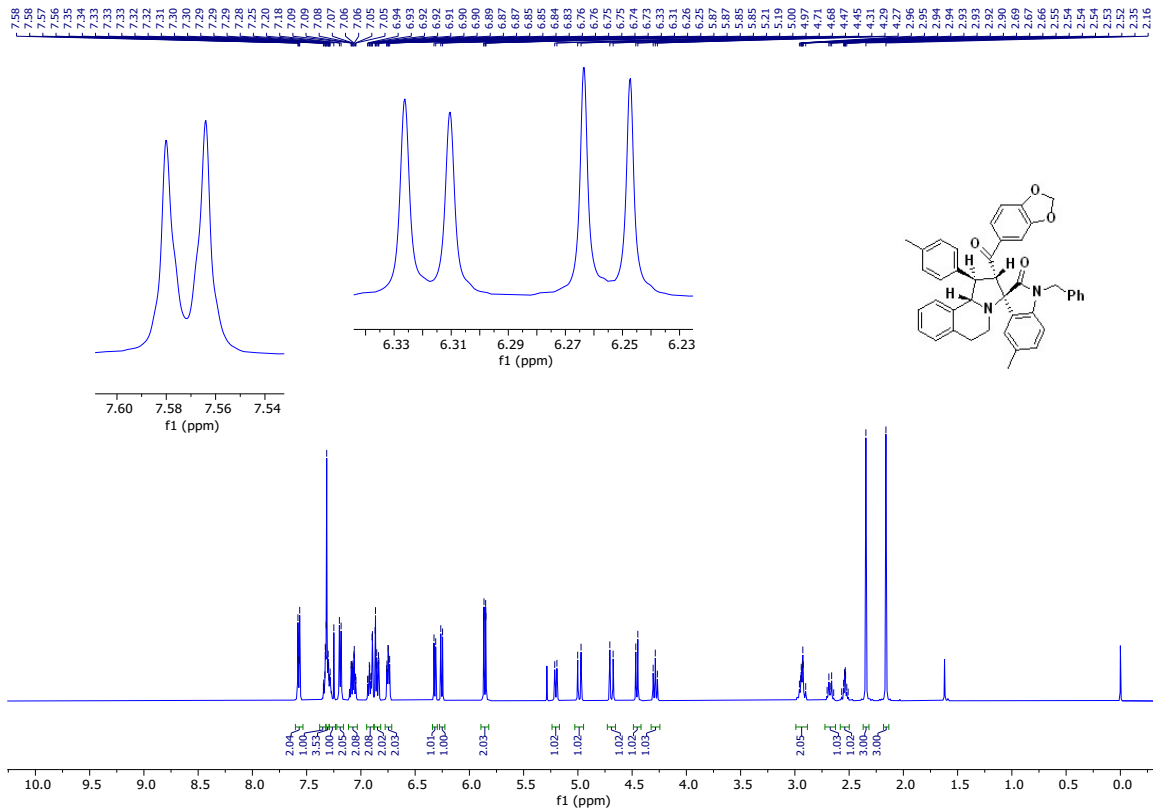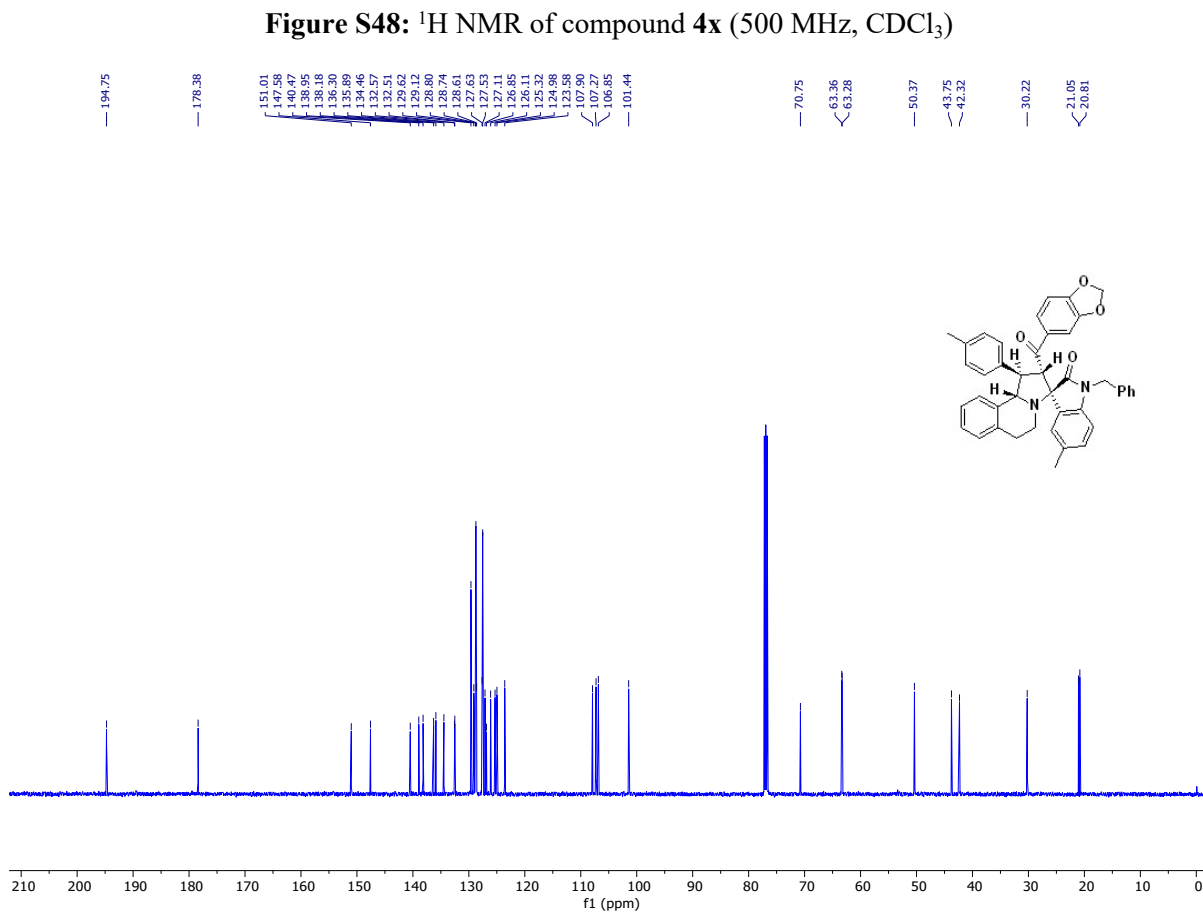

**Figure S49:  $^{13}\text{C}$  NMR of compound 4x (126 MHz,  $\text{CDCl}_3$ )**

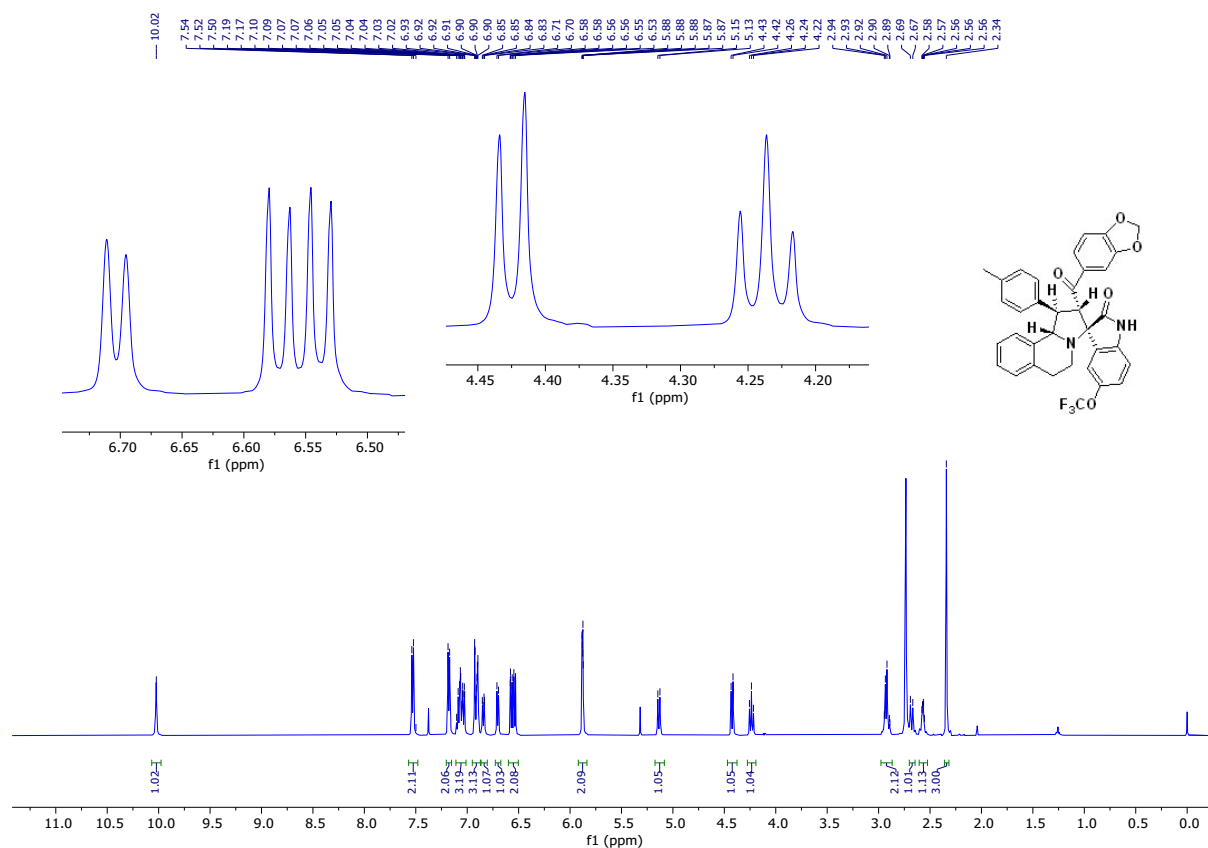

**Figure S50:  $^1\text{H}$  NMR of compound **4y** (500 MHz,  $\text{CDCl}_3$ )**

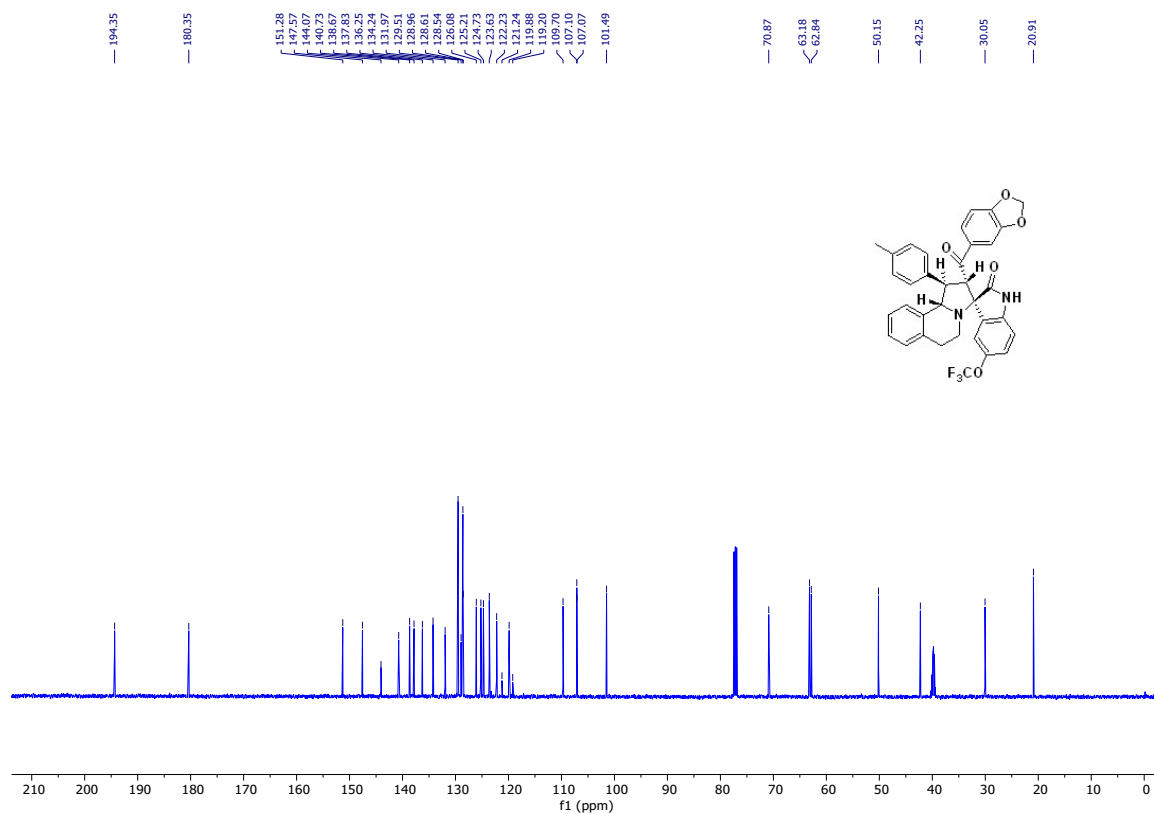

**Figure S51:  $^{13}\text{C}$  NMR of compound **4y** (126 MHz,  $\text{CDCl}_3$ )**

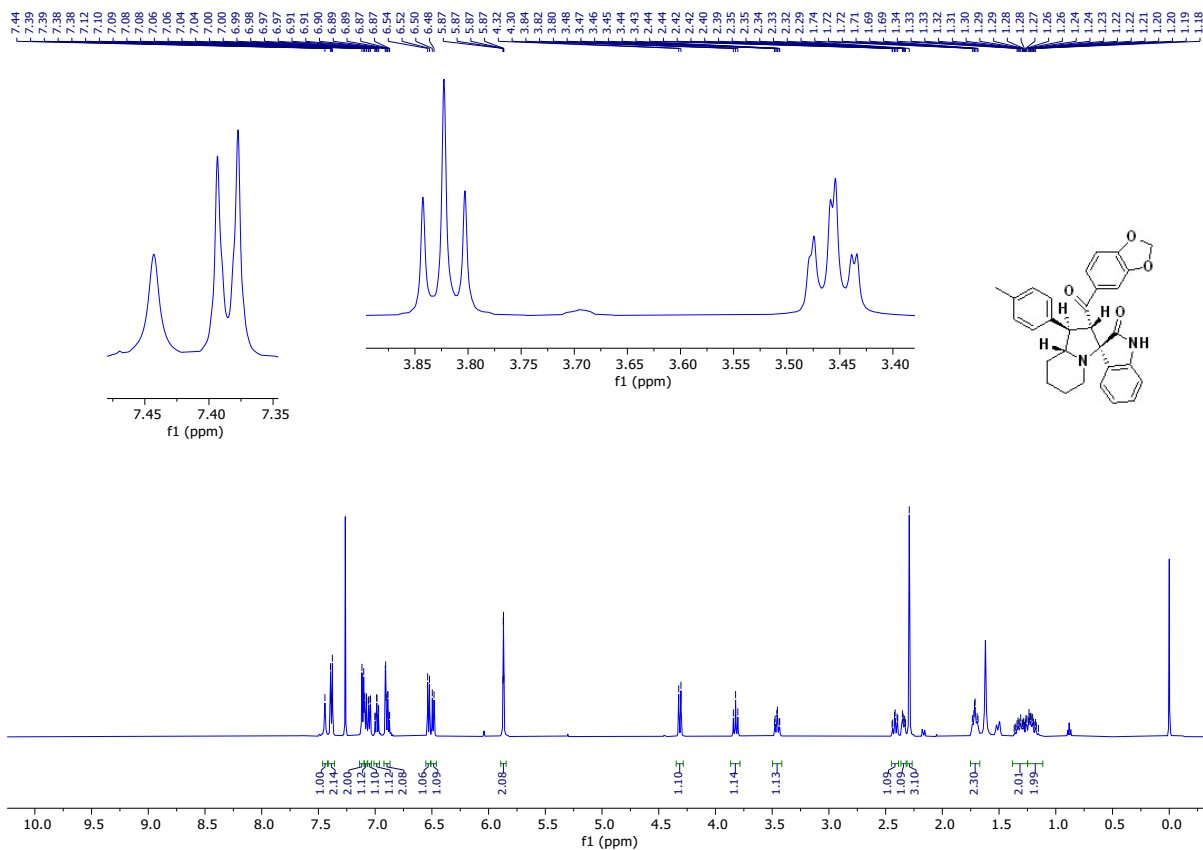

**Figure S52: <sup>1</sup>H NMR of compound 5b (500 MHz, CDCl<sub>3</sub>)**

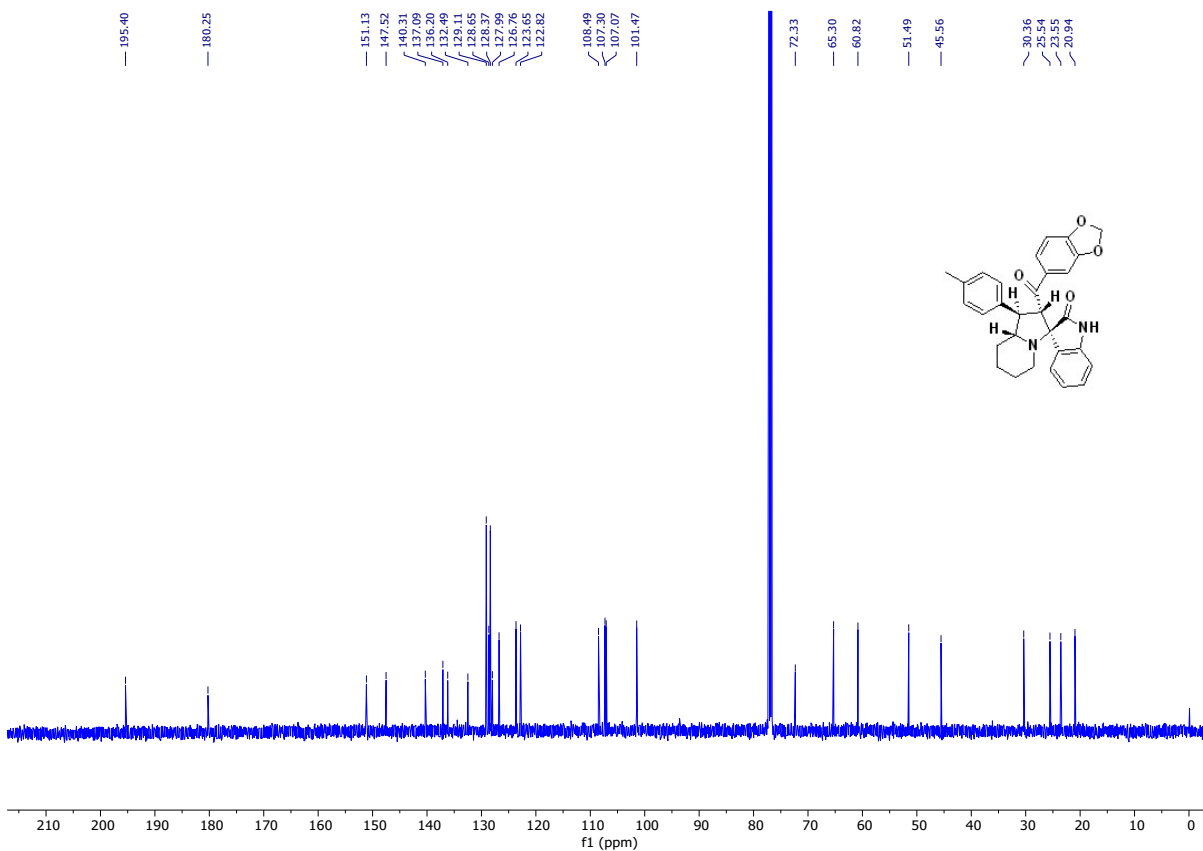

**Figure S53: <sup>13</sup>C NMR of compound 5b (126 MHz, CDCl<sub>3</sub>)**

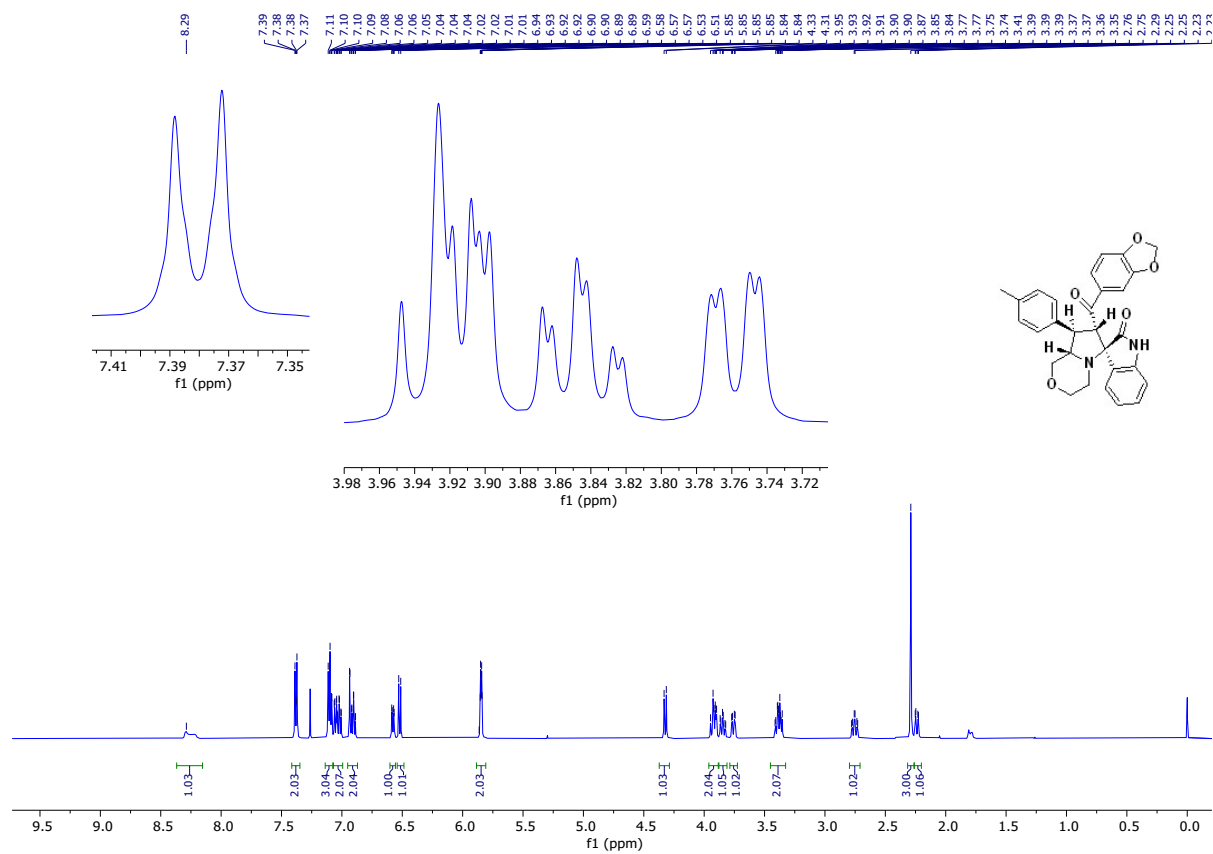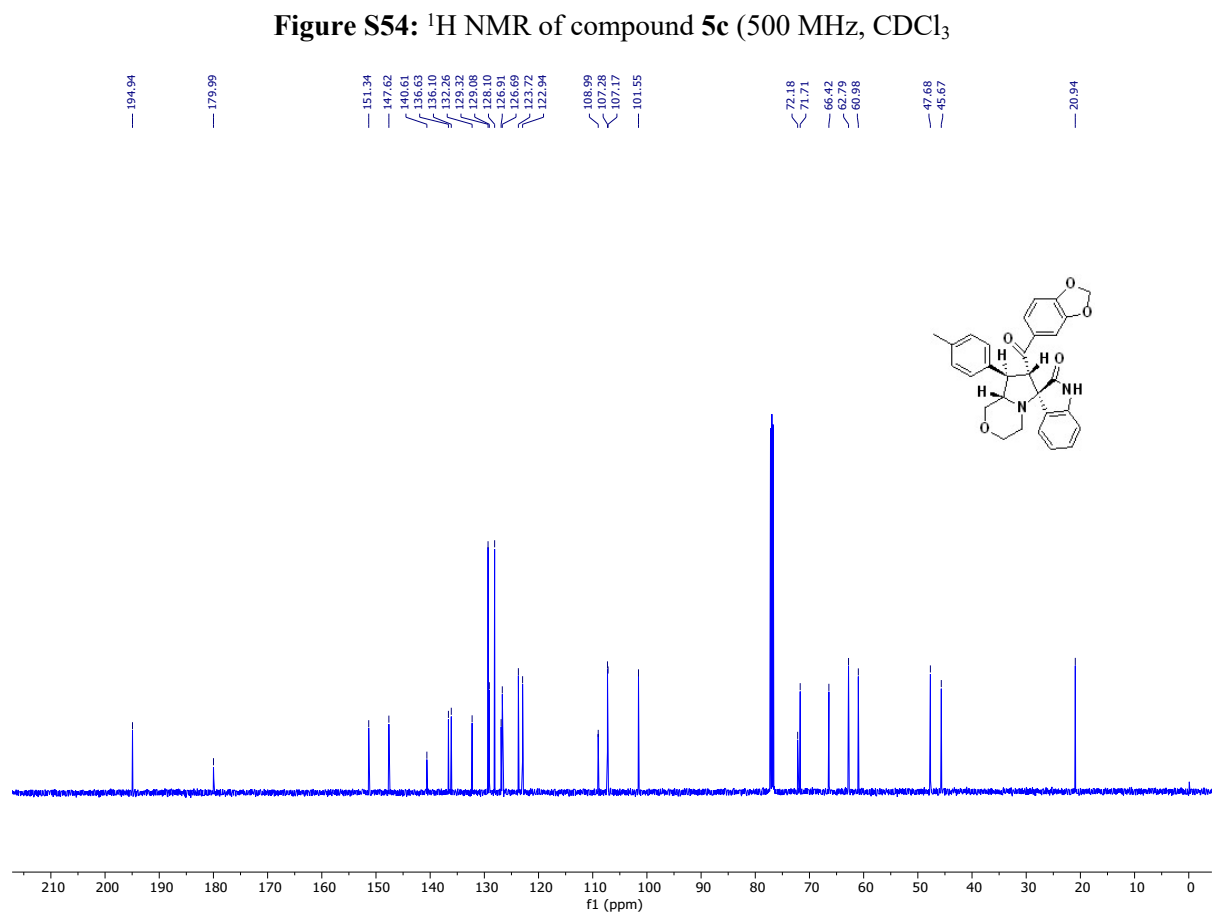

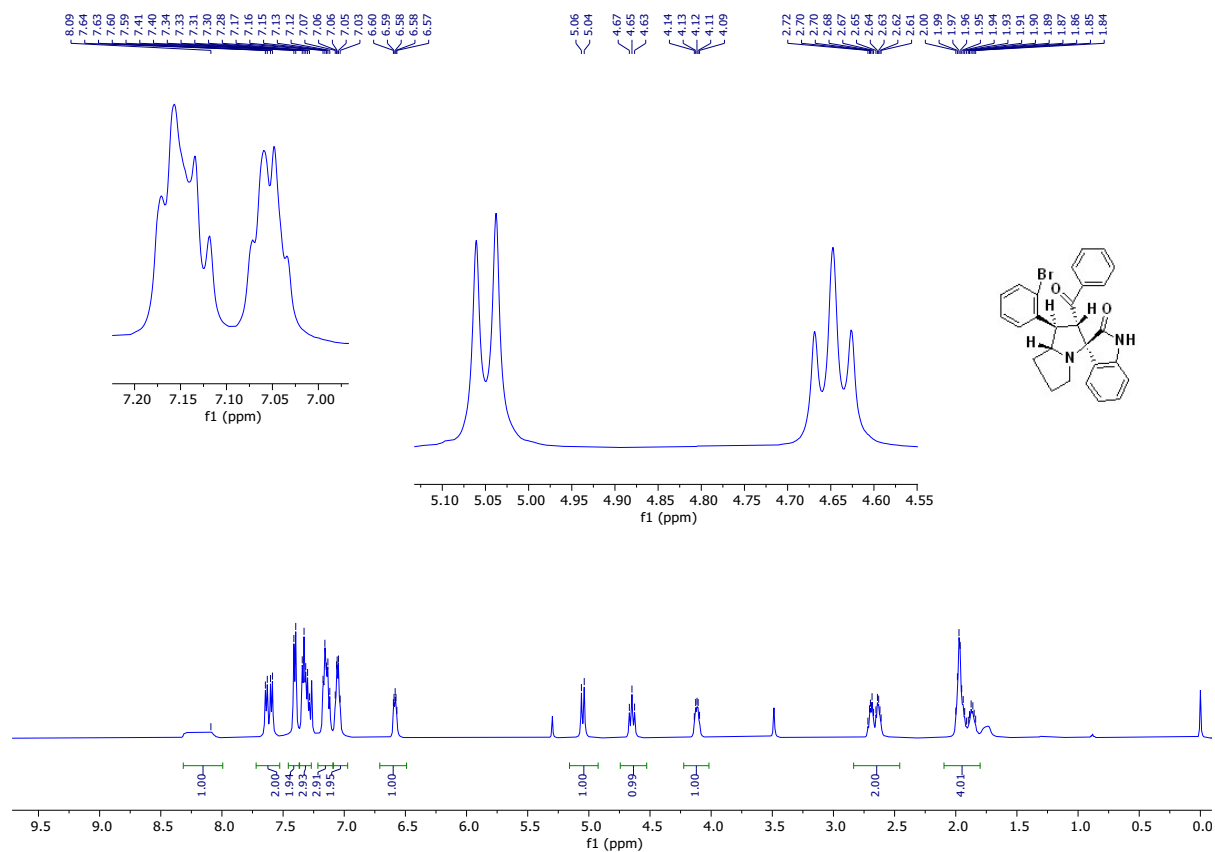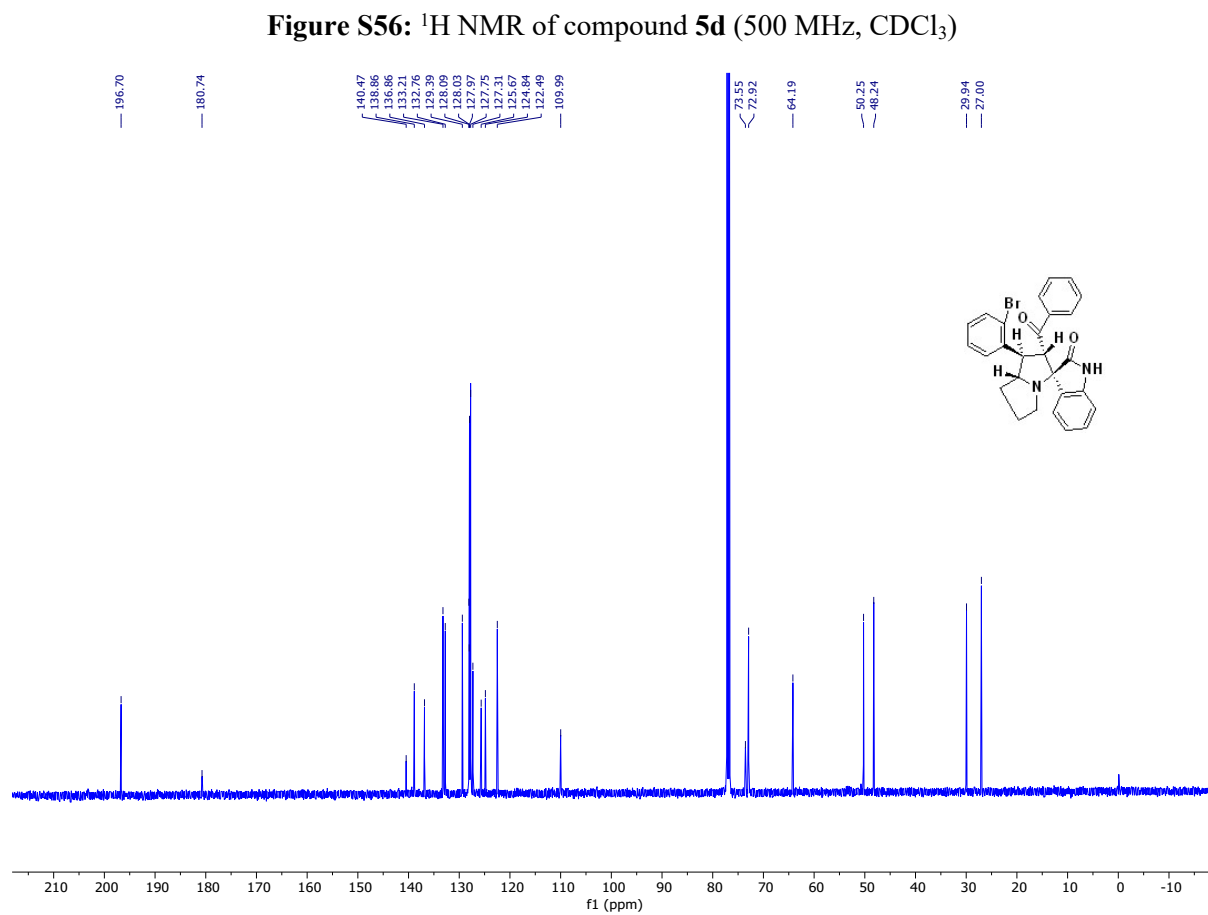



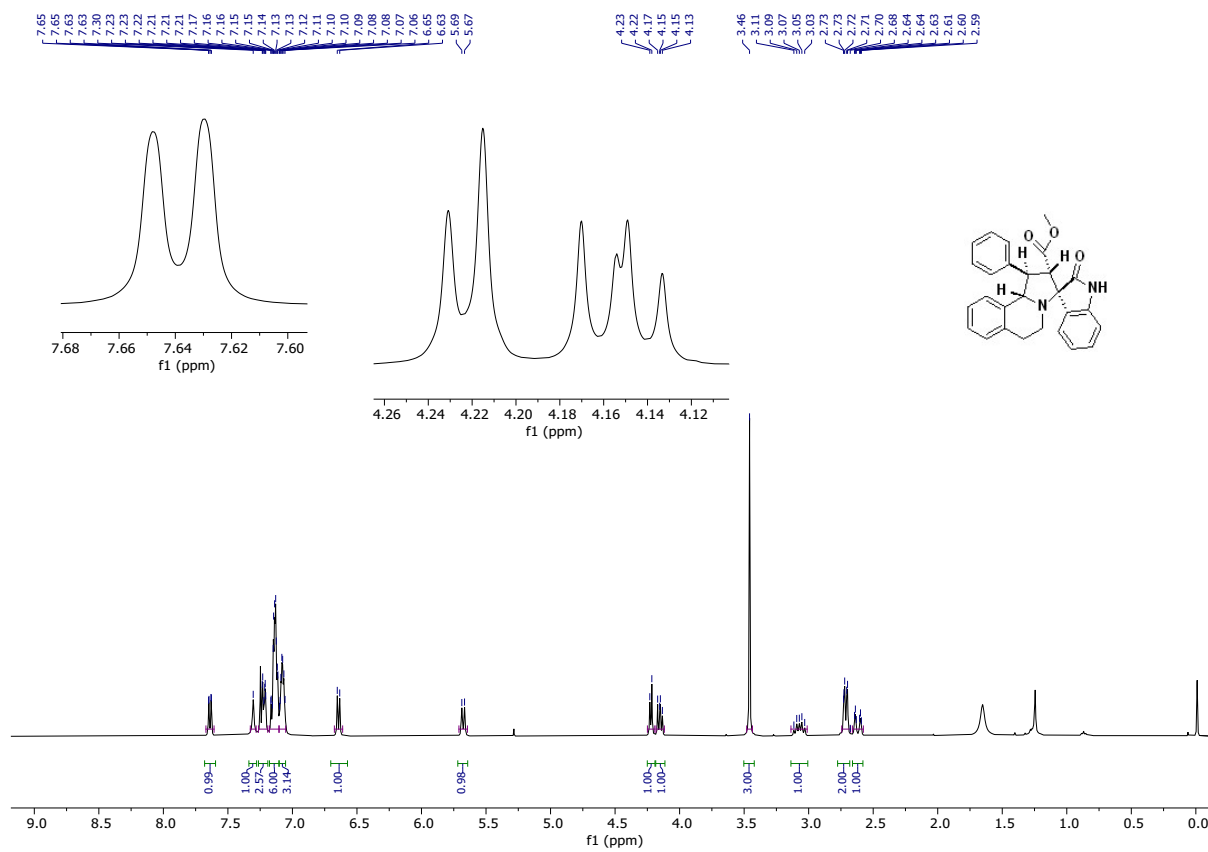

**Figure S58:  $^1\text{H}$  NMR of compound 5d (500 MHz,  $\text{CDCl}_3$ )**

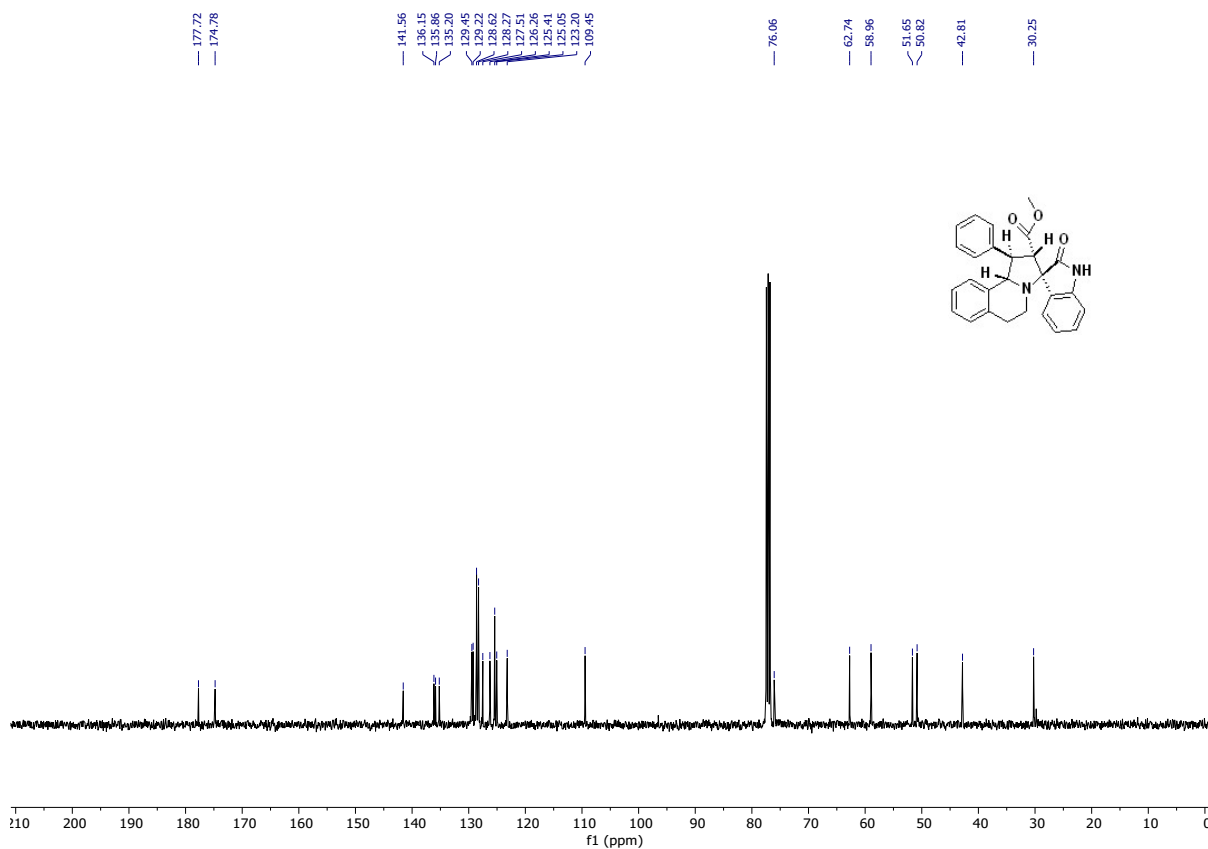

**Figure S59:  $^{13}\text{C}$  NMR of compound 5d (126 MHz,  $\text{CDCl}_3$ )**

## 5. Copies of HRMS Spectra

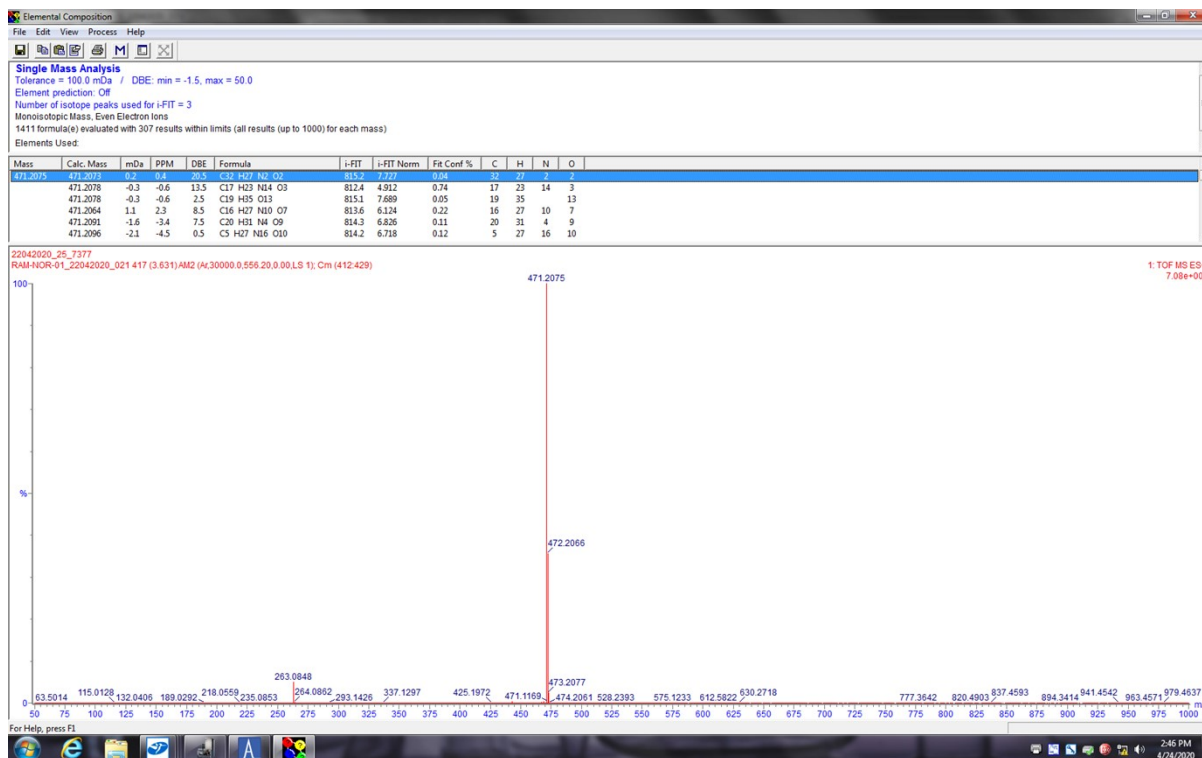

Figure S60: HRMS of Compound 4a

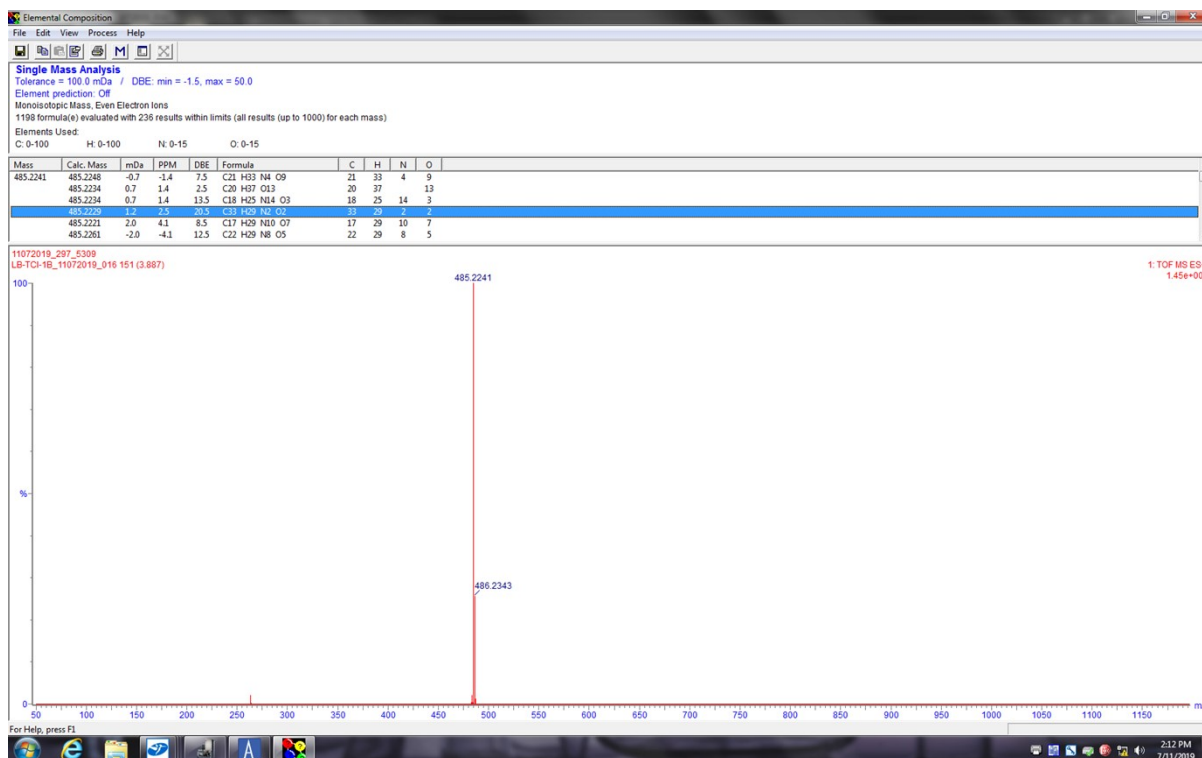

Figure S61: HRMS of Compound 4b

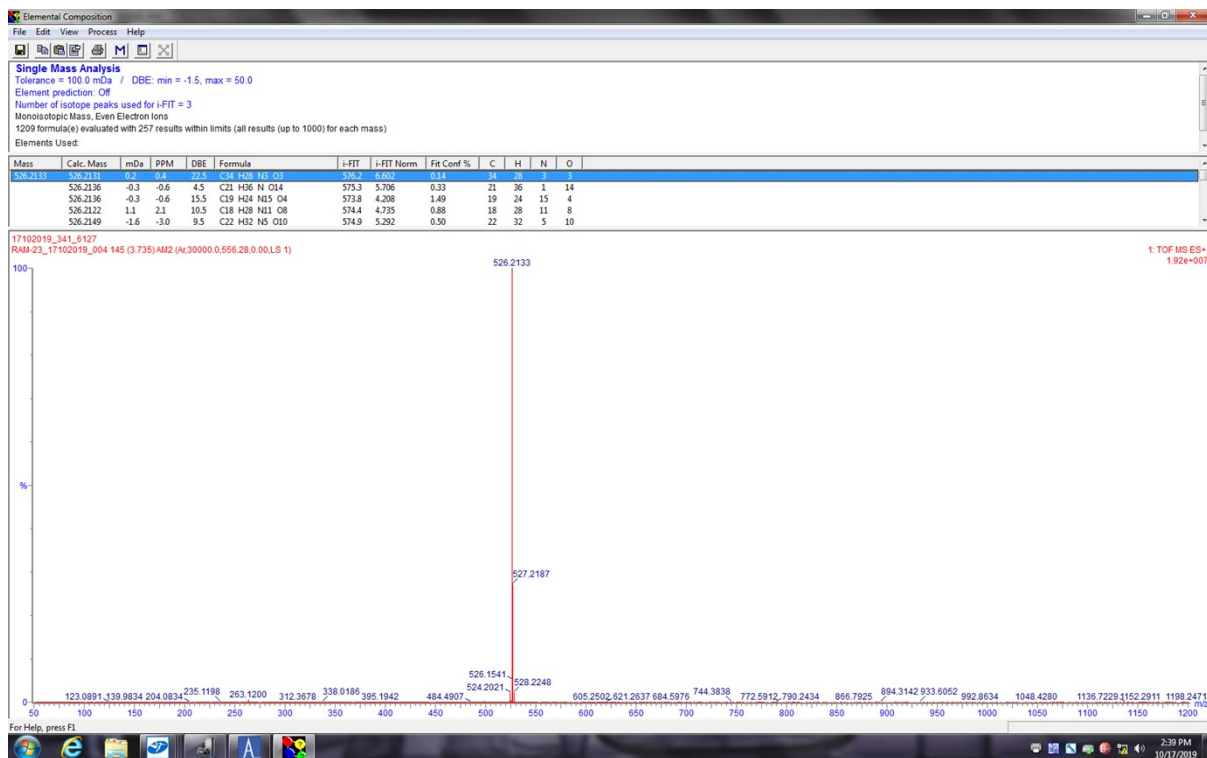

Figure S62: HRMS of Compound 4c

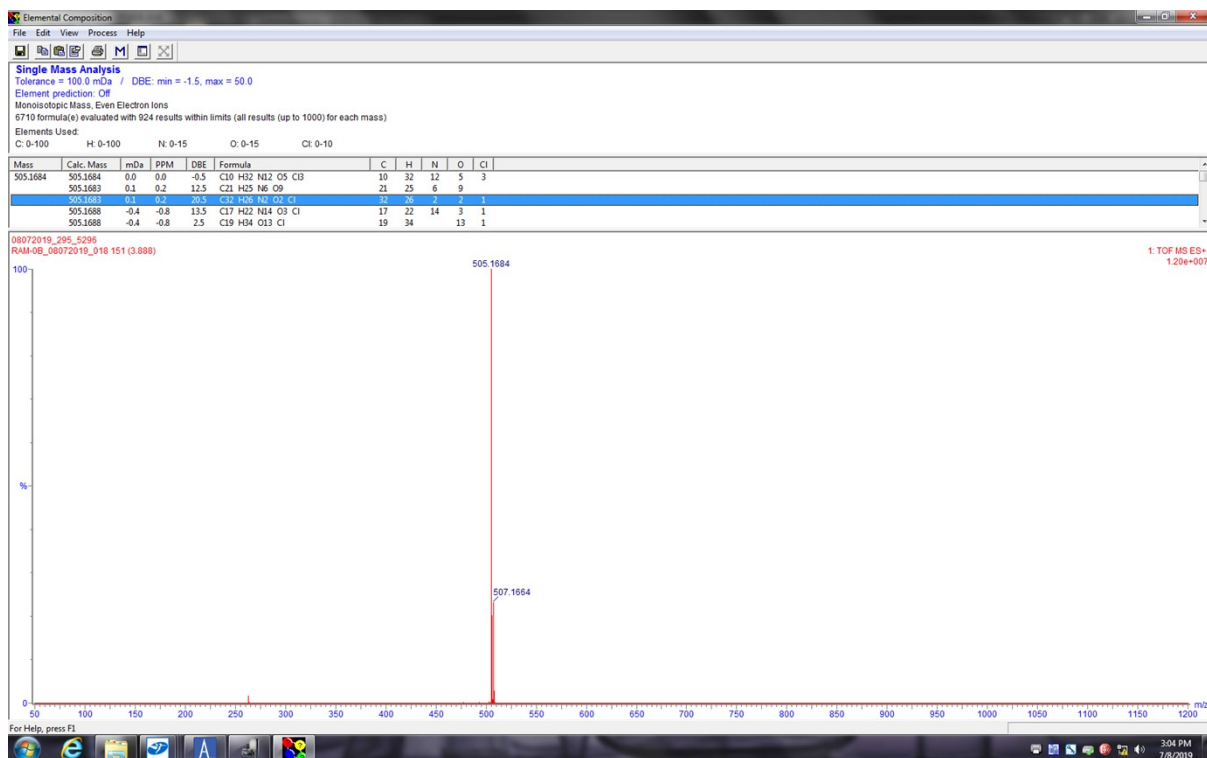

Figure S63: HRMS of Compound 4d

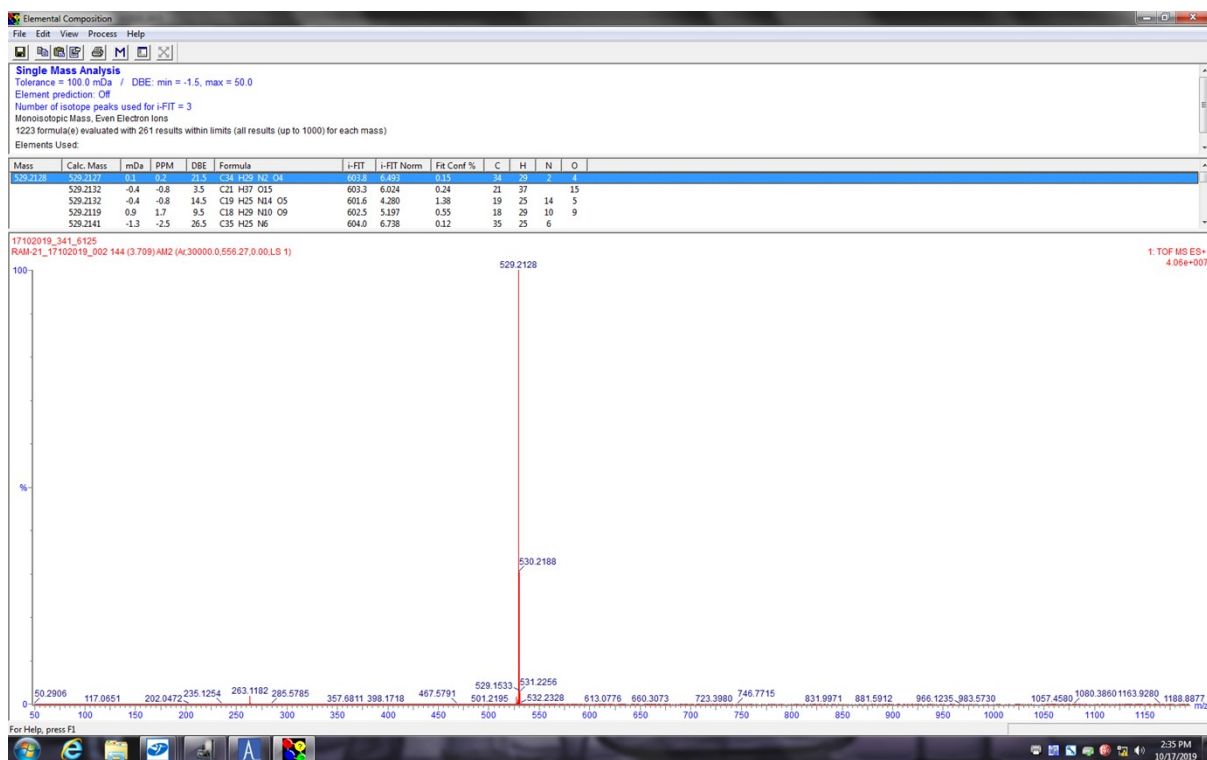

Figure S64: HRMS of Compound 4e

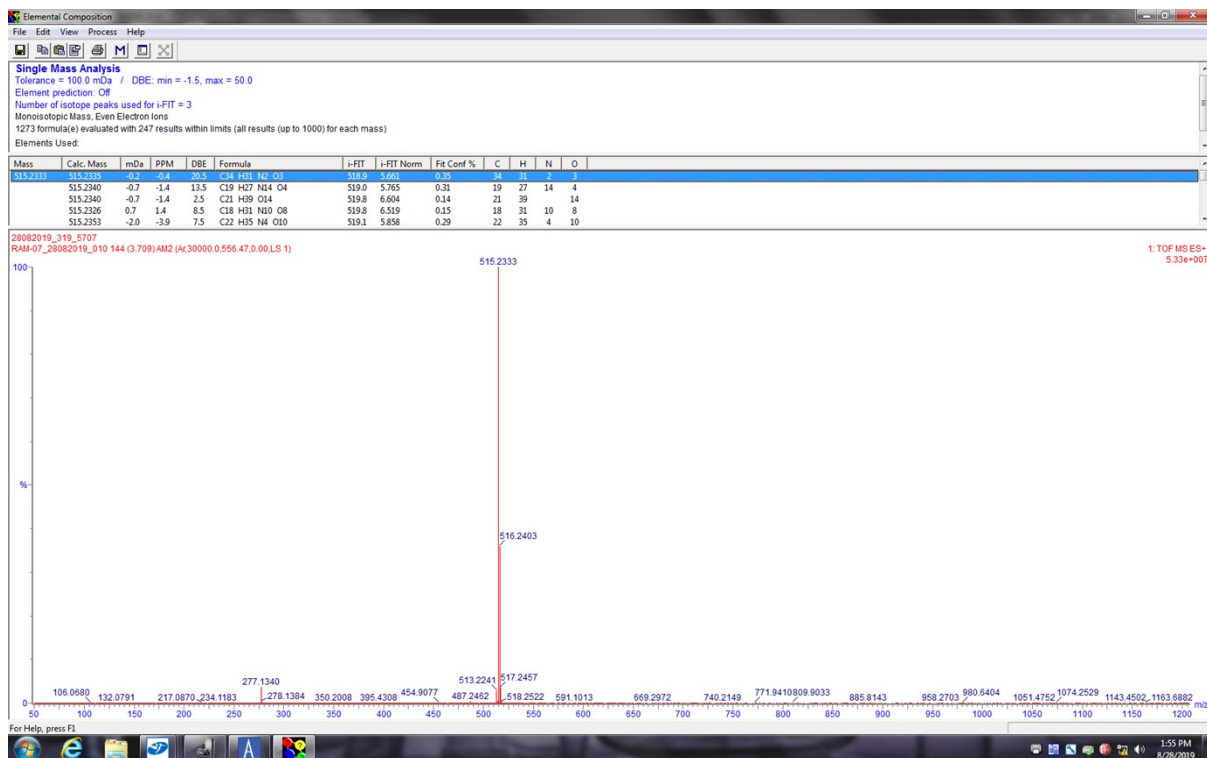

Figure S65: HRMS of Compound 4f

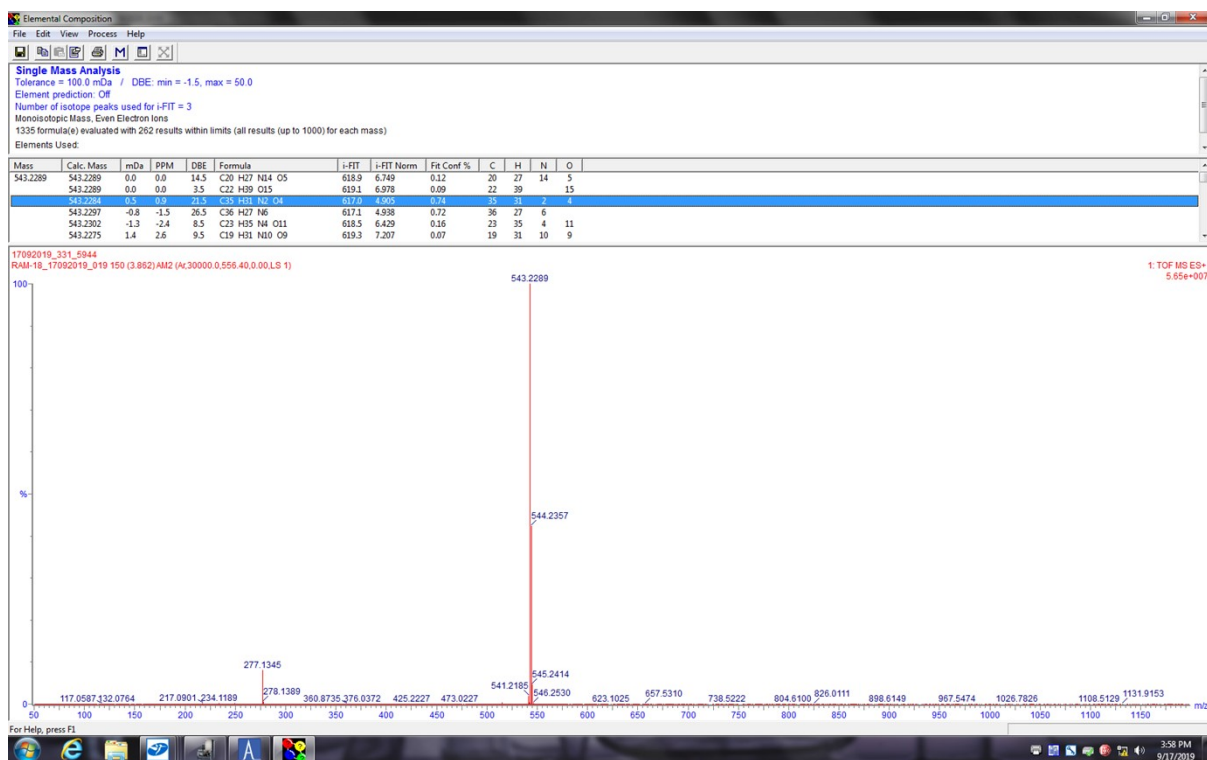

Figure S66: HRMS of Compound 4g

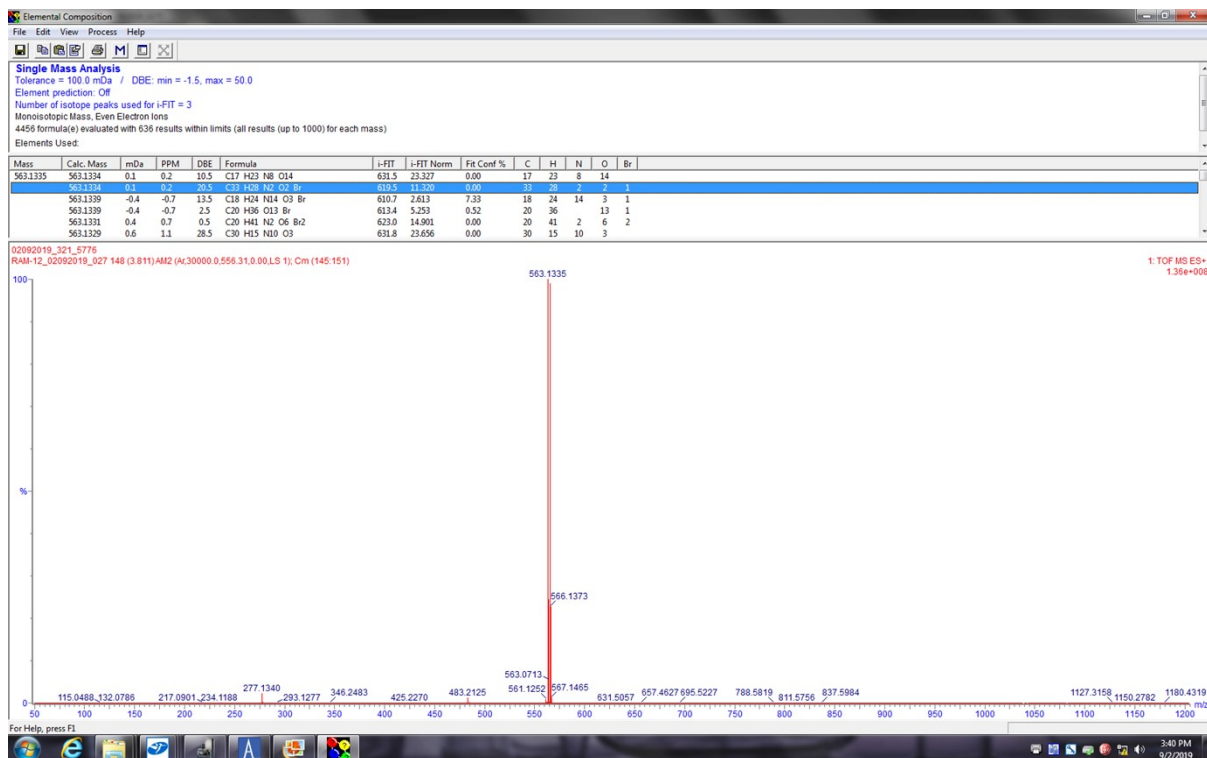

Figure S67: HRMS of Compound 4h

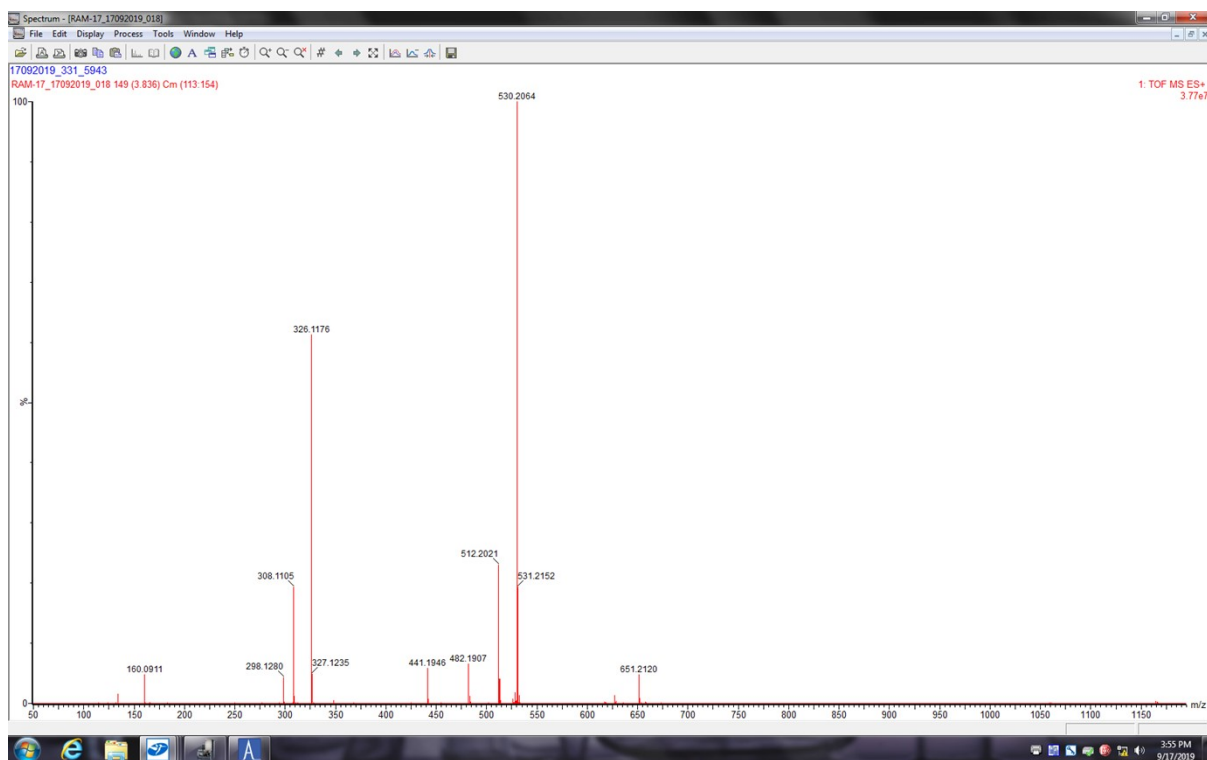

Figure S68: HRMS of Compound 4i

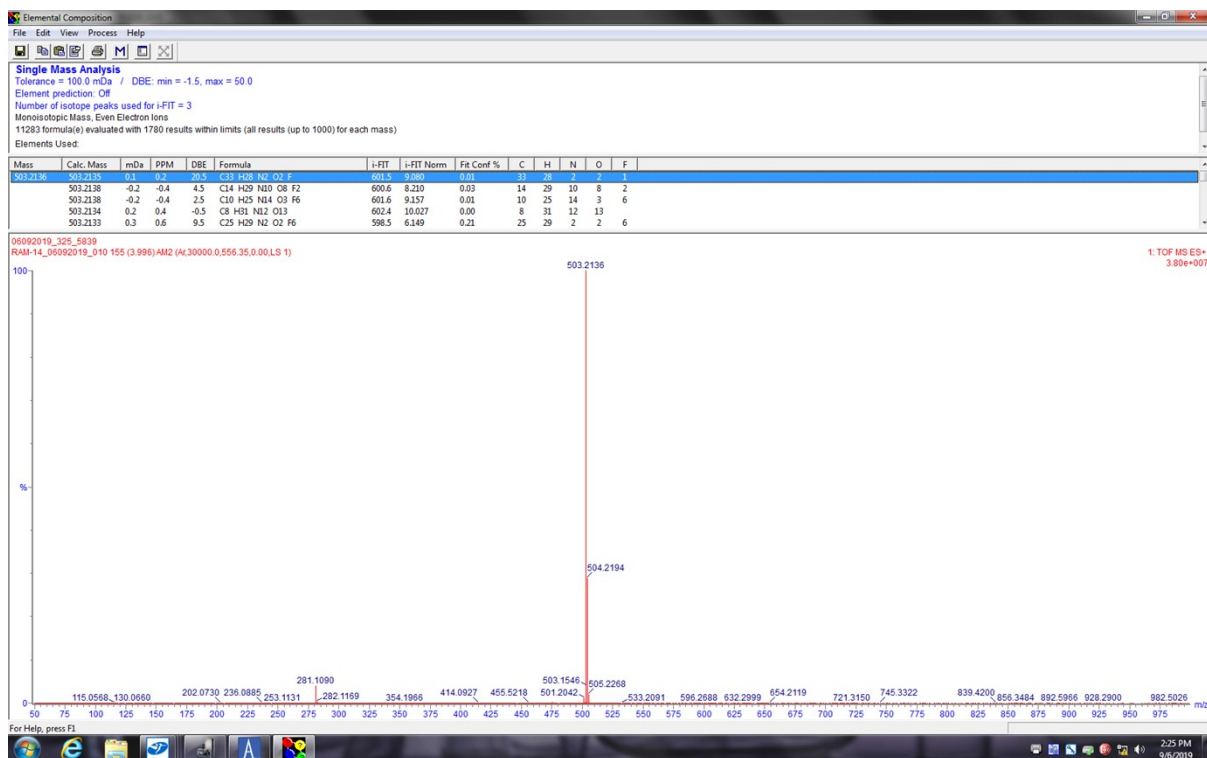

Figure S69: HRMS of Compound 4j

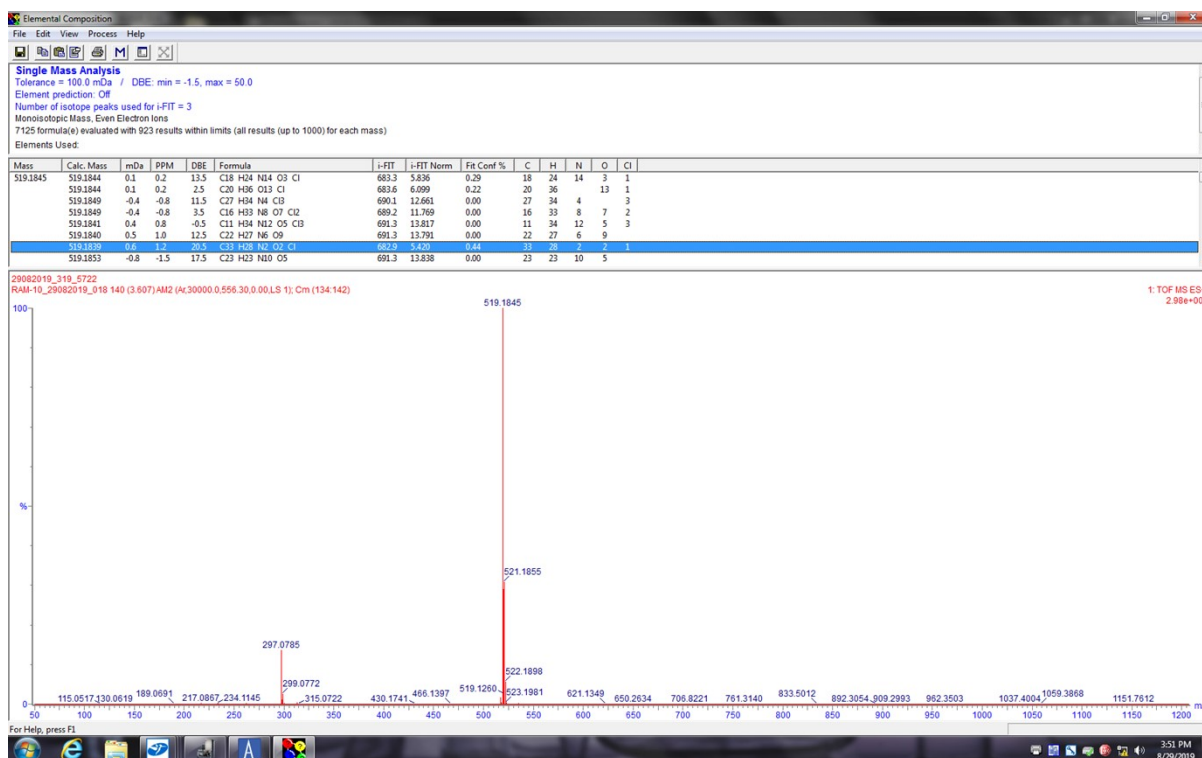

Figure S70: HRMS of Compound 4k

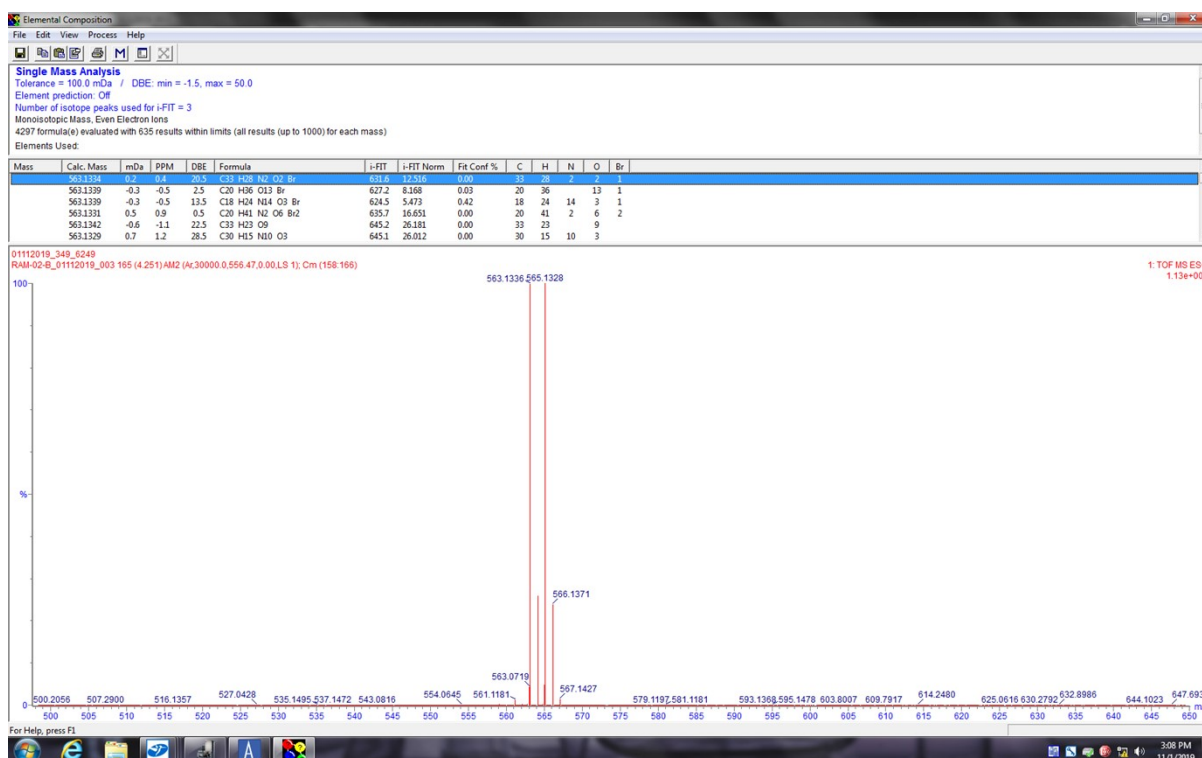

Figure S71: HRMS of Compound 4l



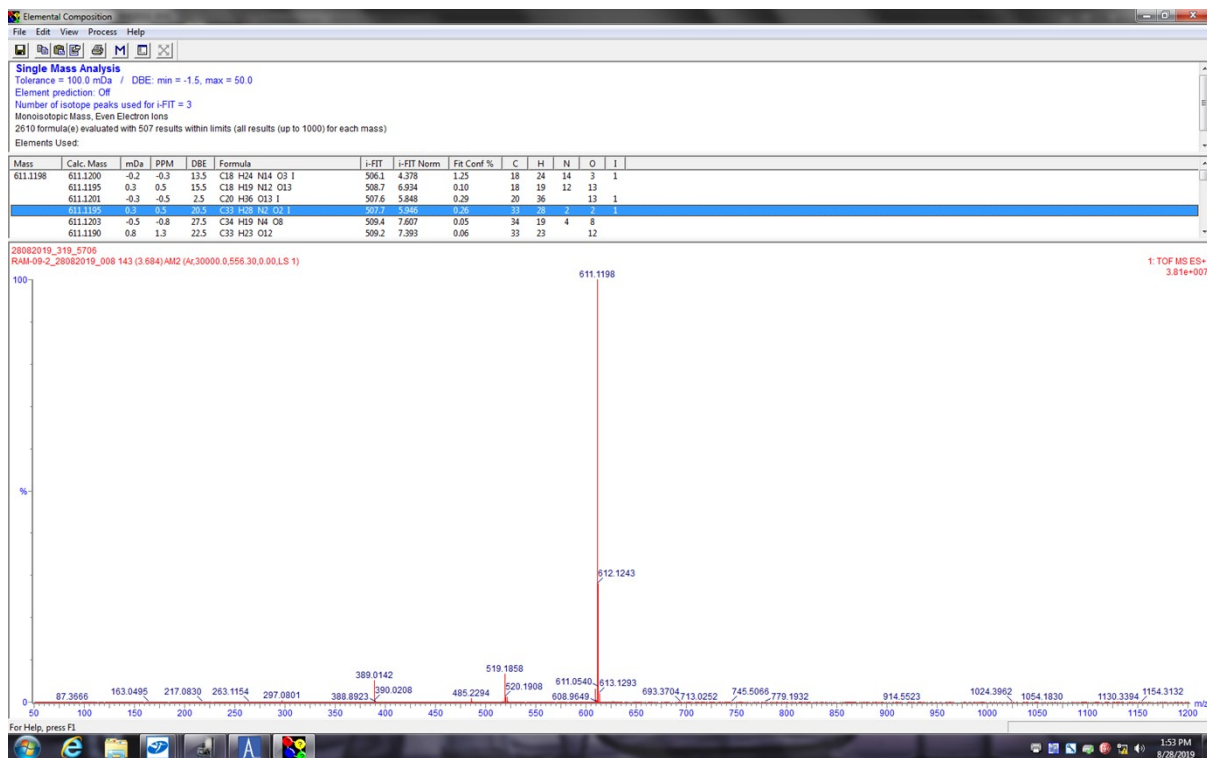

Figure S72: HRMS of Compound 4m

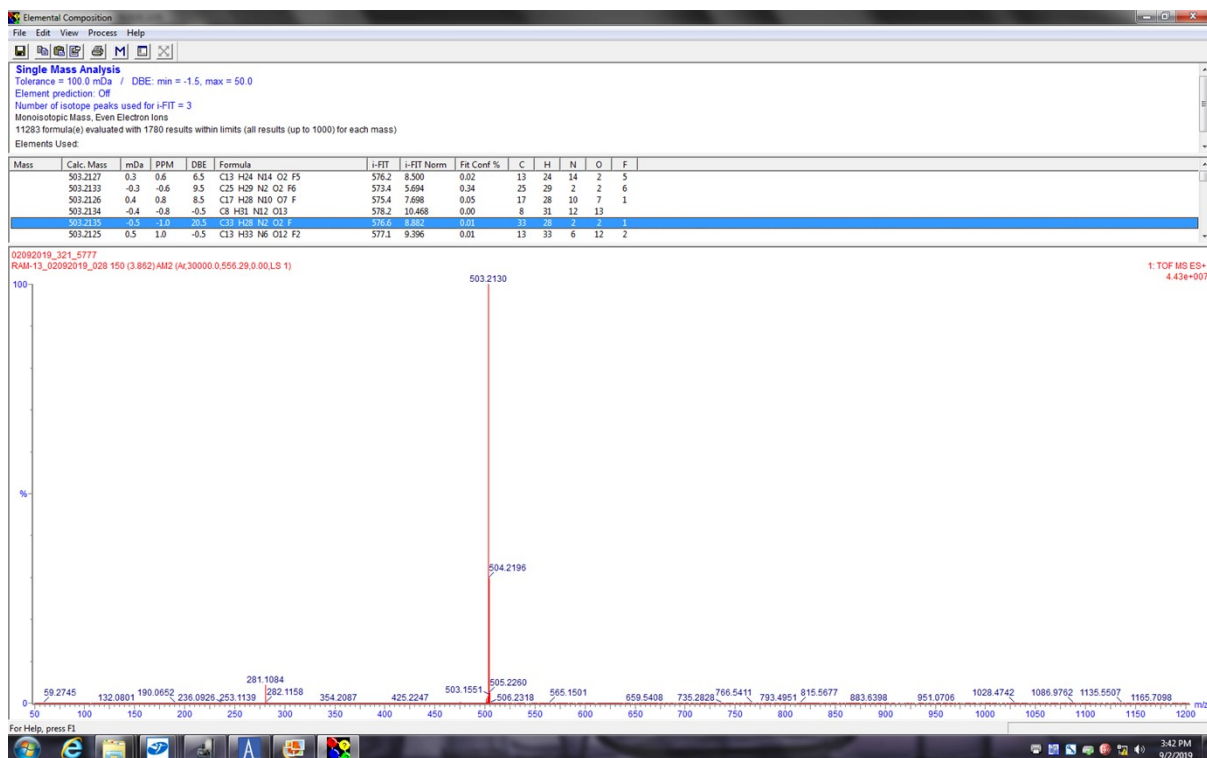

Figure S73: HRMS of Compound 4n



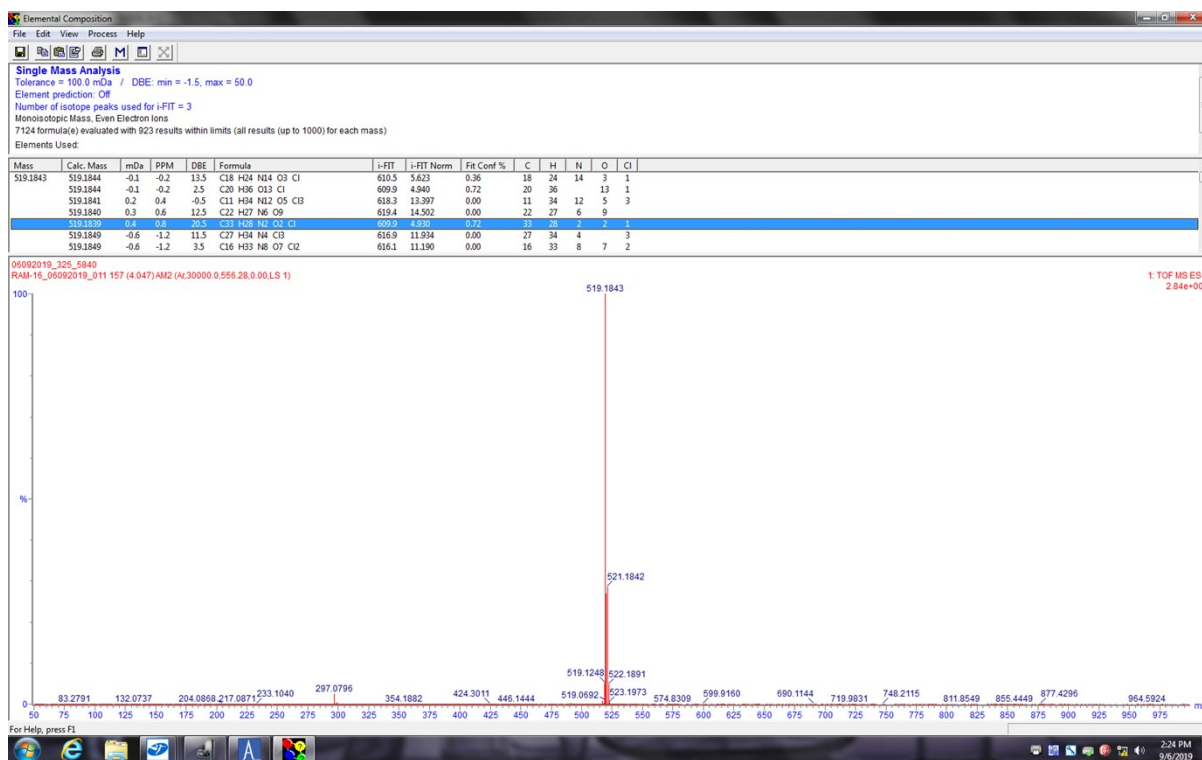

Figure S74: HRMS of Compound 4o

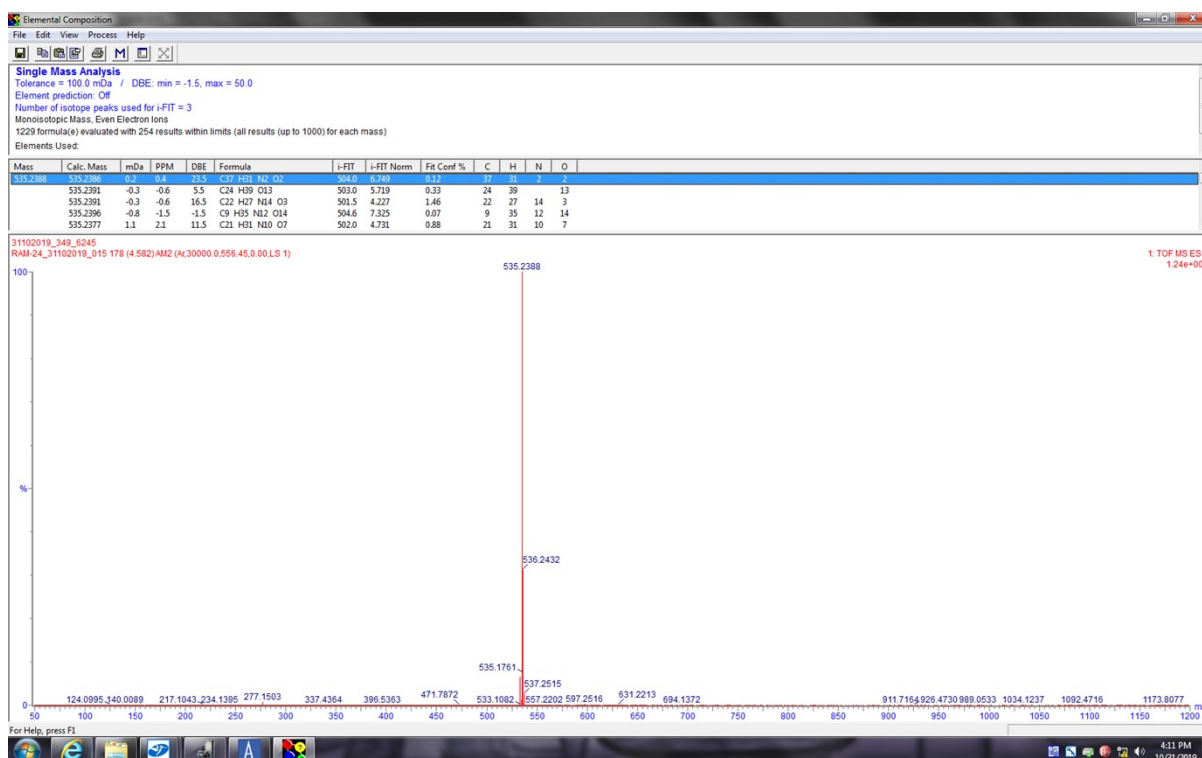

Figure S75: HRMS of Compound 4p

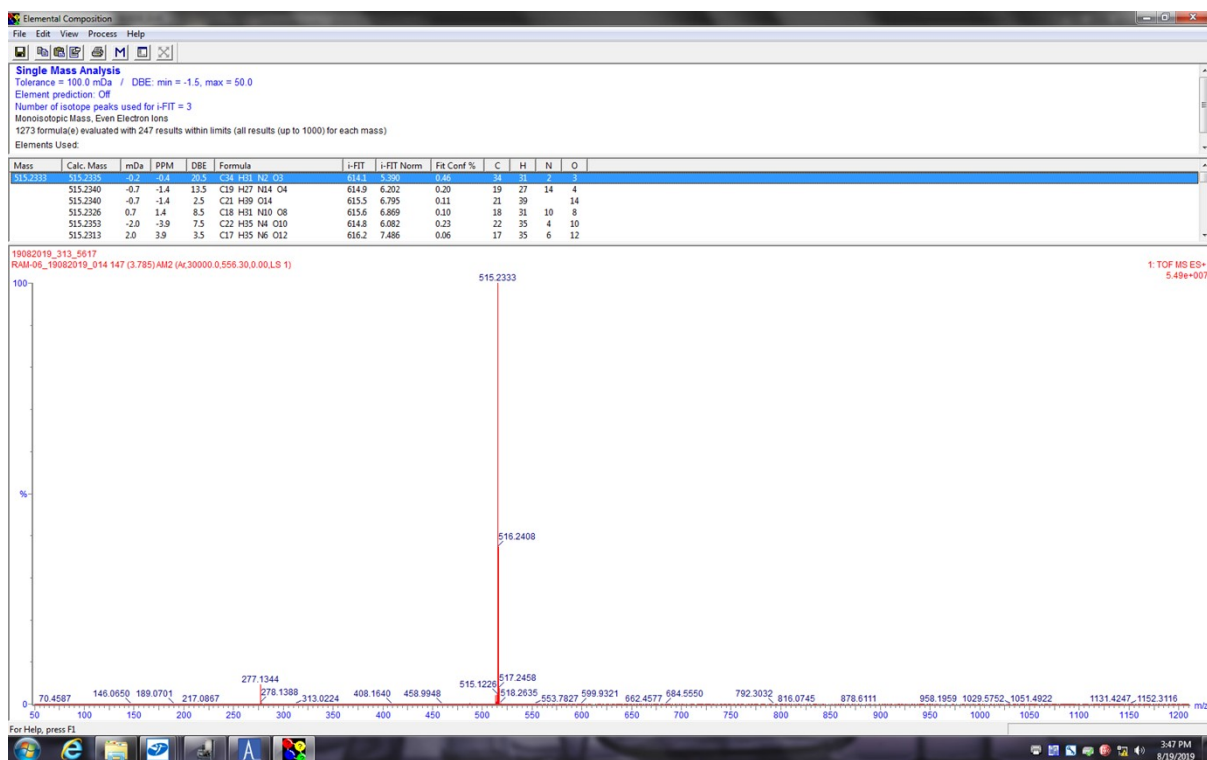

Figure S76: HRMS of Compound 4q

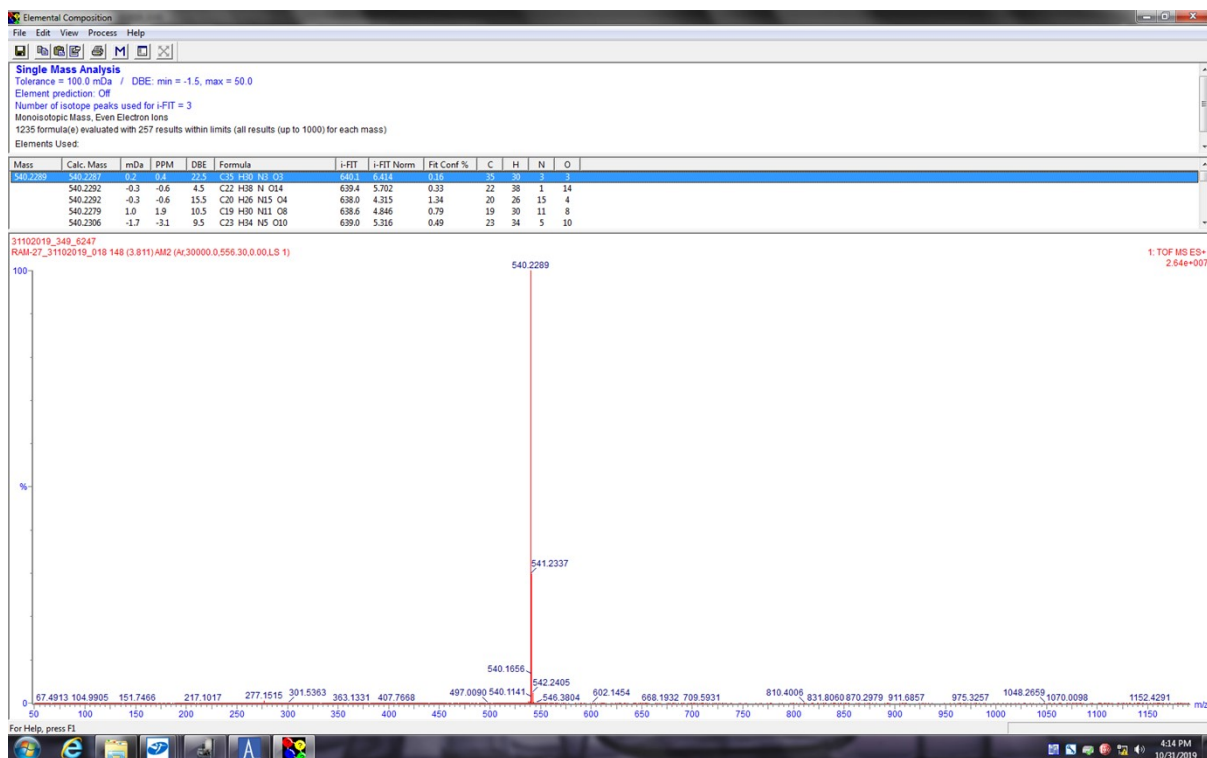

Figure S77: HRMS of Compound 4r

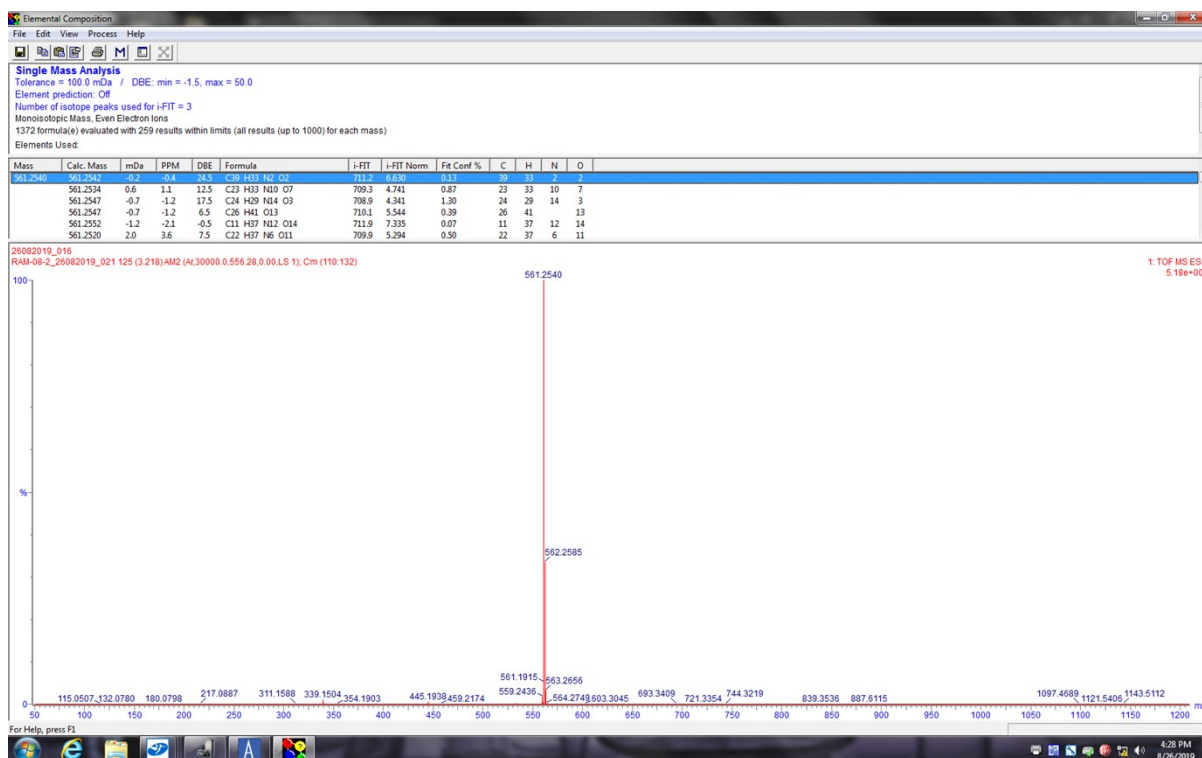

Figure S78: HRMS of Compound 4s

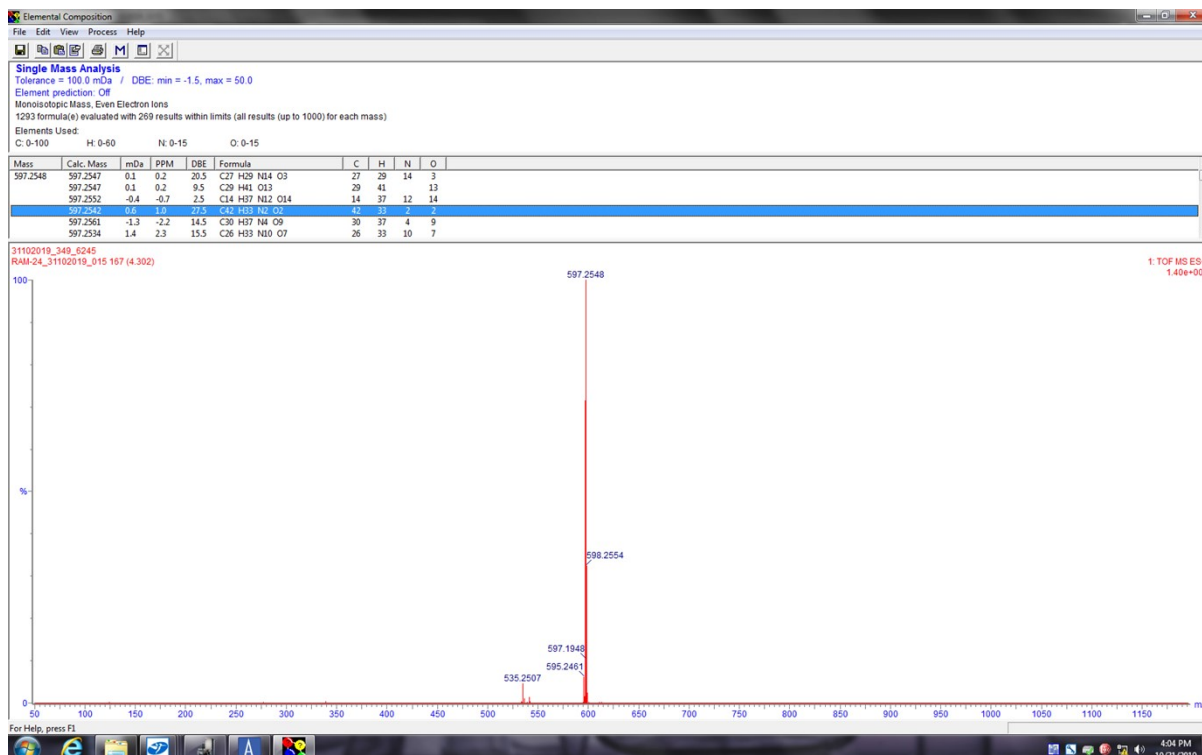

Figure S79: HRMS of Compound 4t

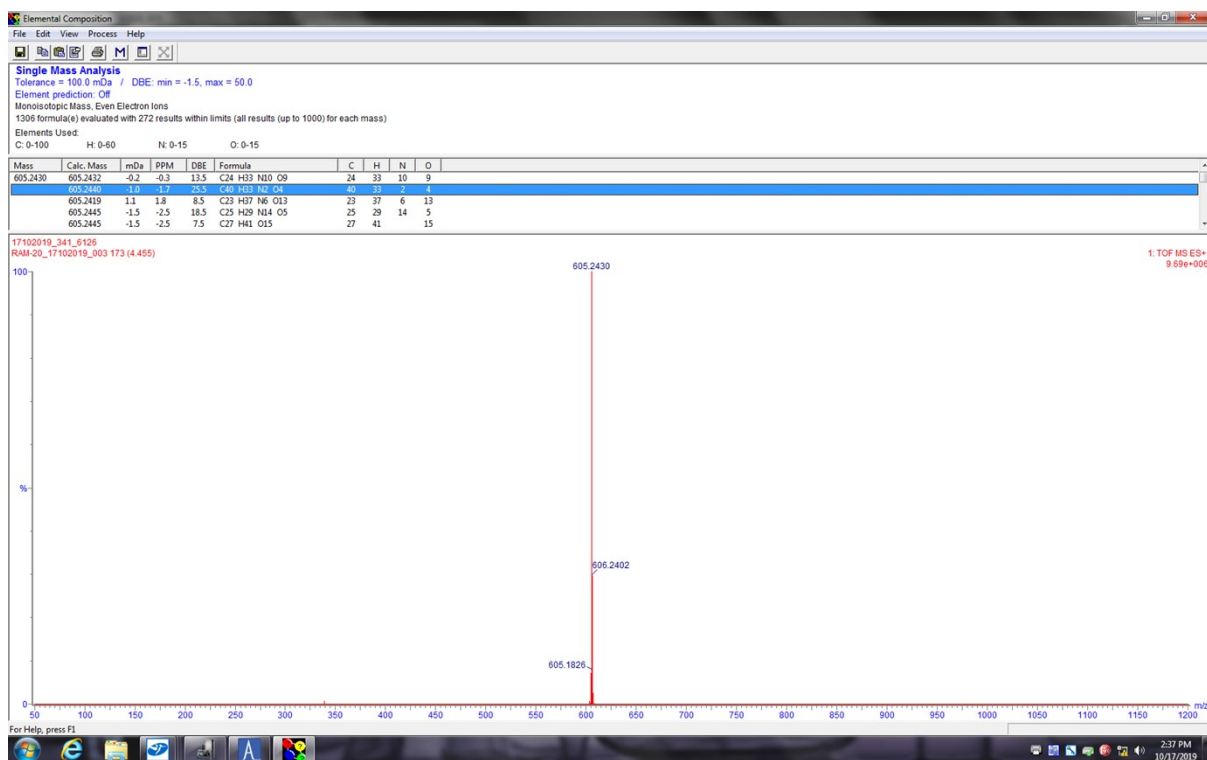

Figure S80: HRMS of Compound 4u

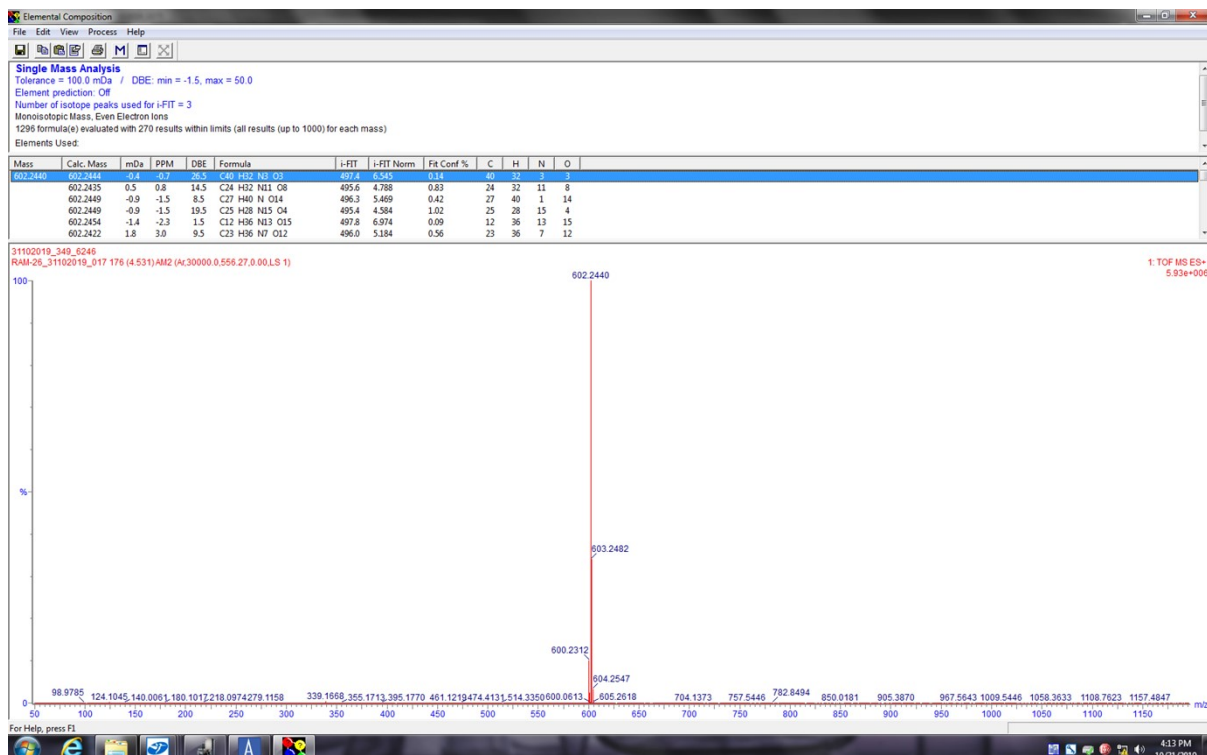

Figure S81: HRMS of Compound 4v

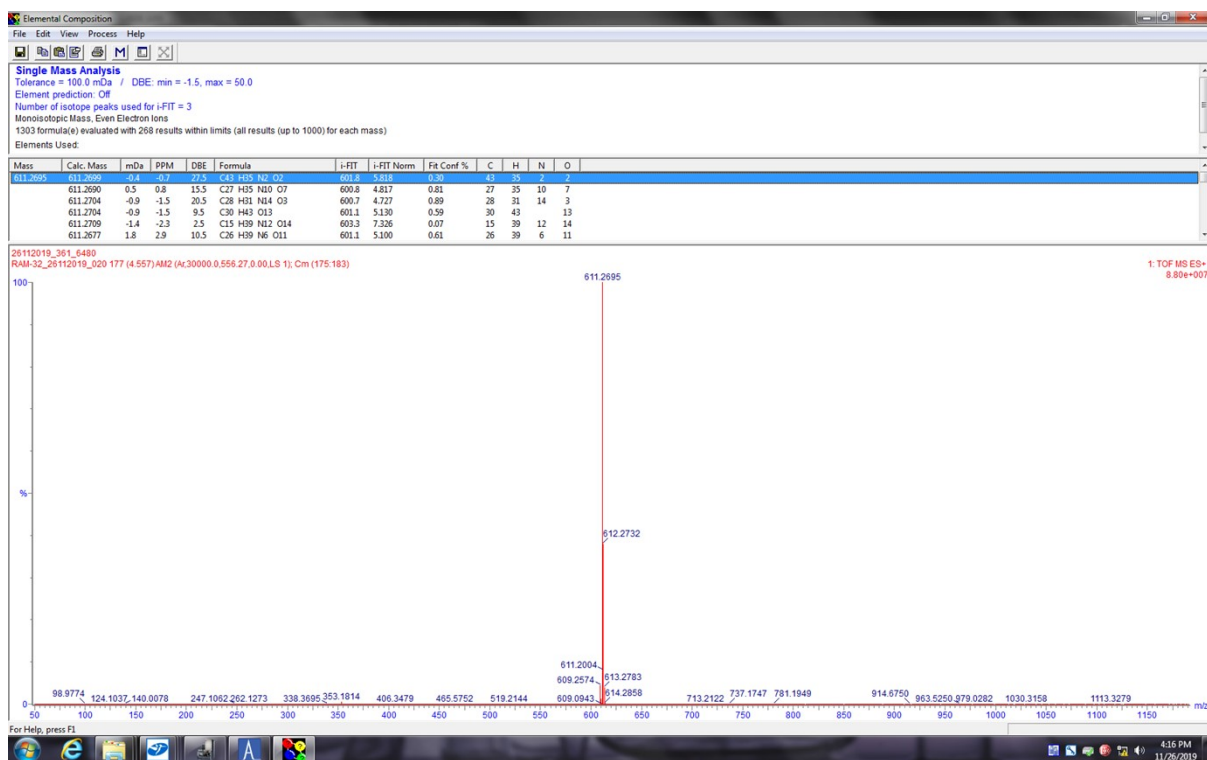

Figure S82: HRMS of Compound 4w

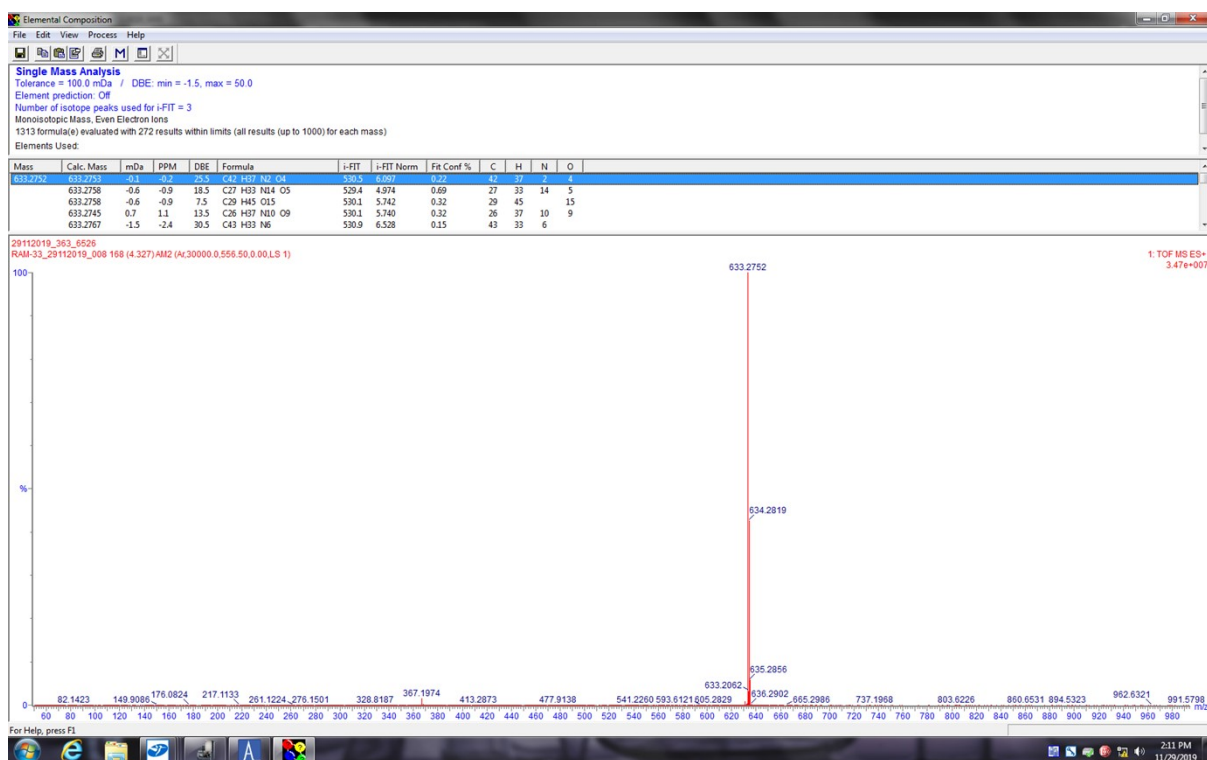

Figure S83: HRMS of Compound 4x

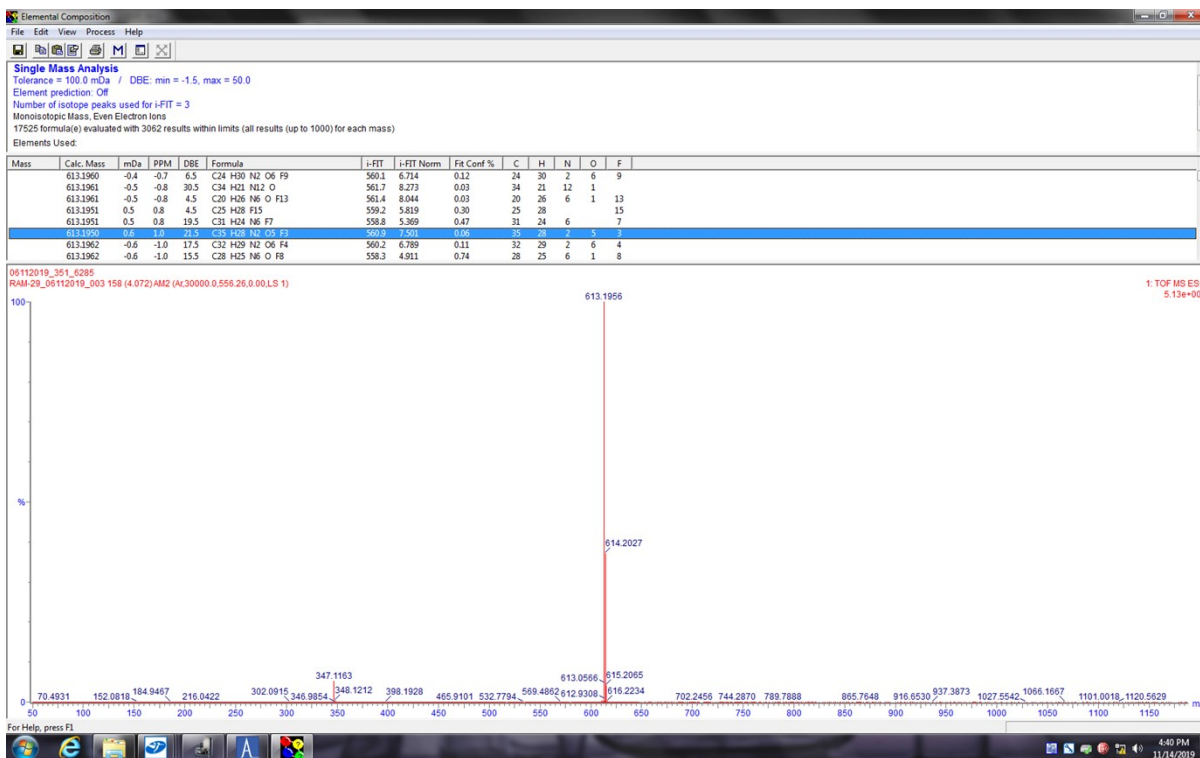

Figure S84: HRMS of Compound 4y

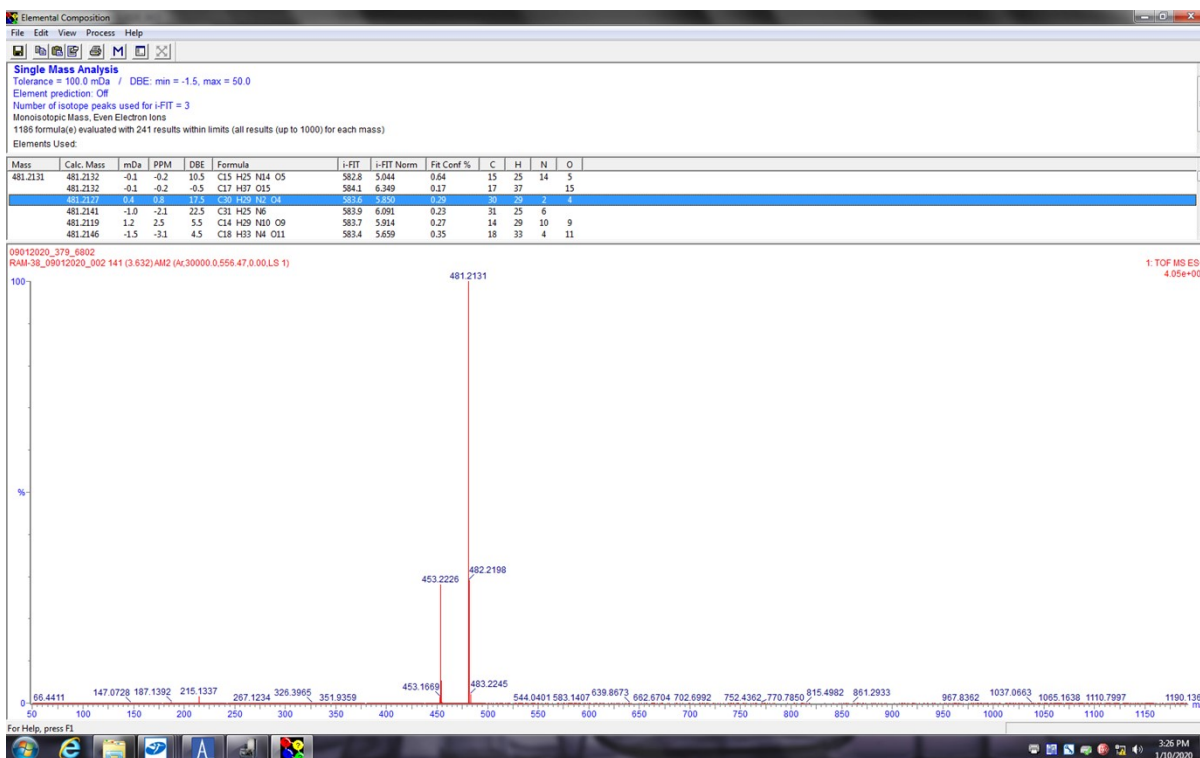

Figure S85: HRMS of Compound 5b



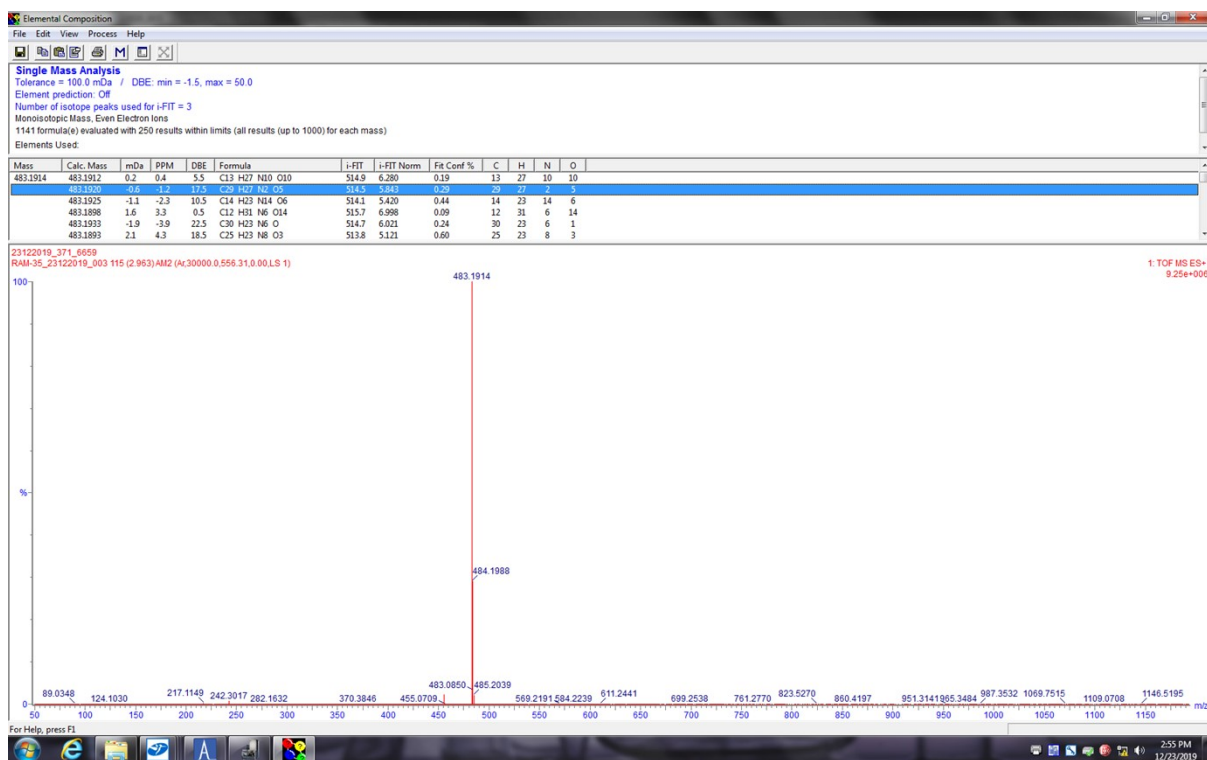

Figure S86: HRMS of Compound 5c

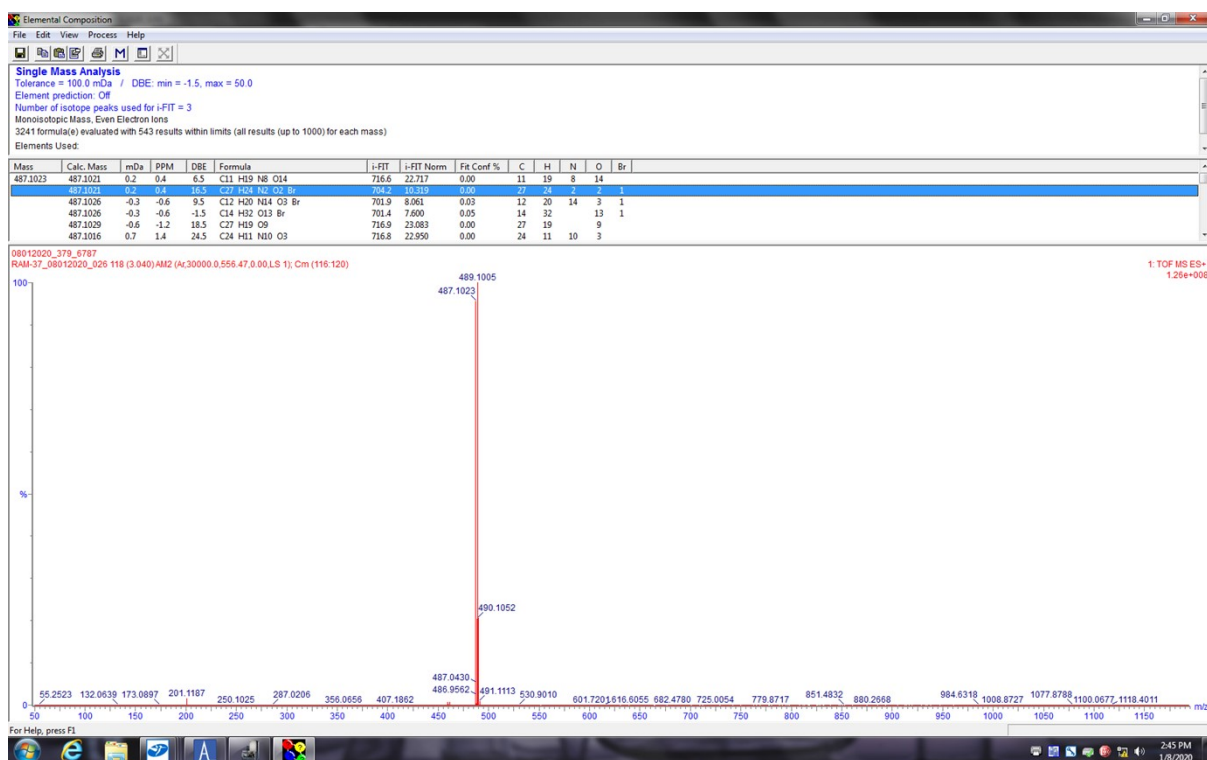

Figure S87: HRMS of Compound 5d

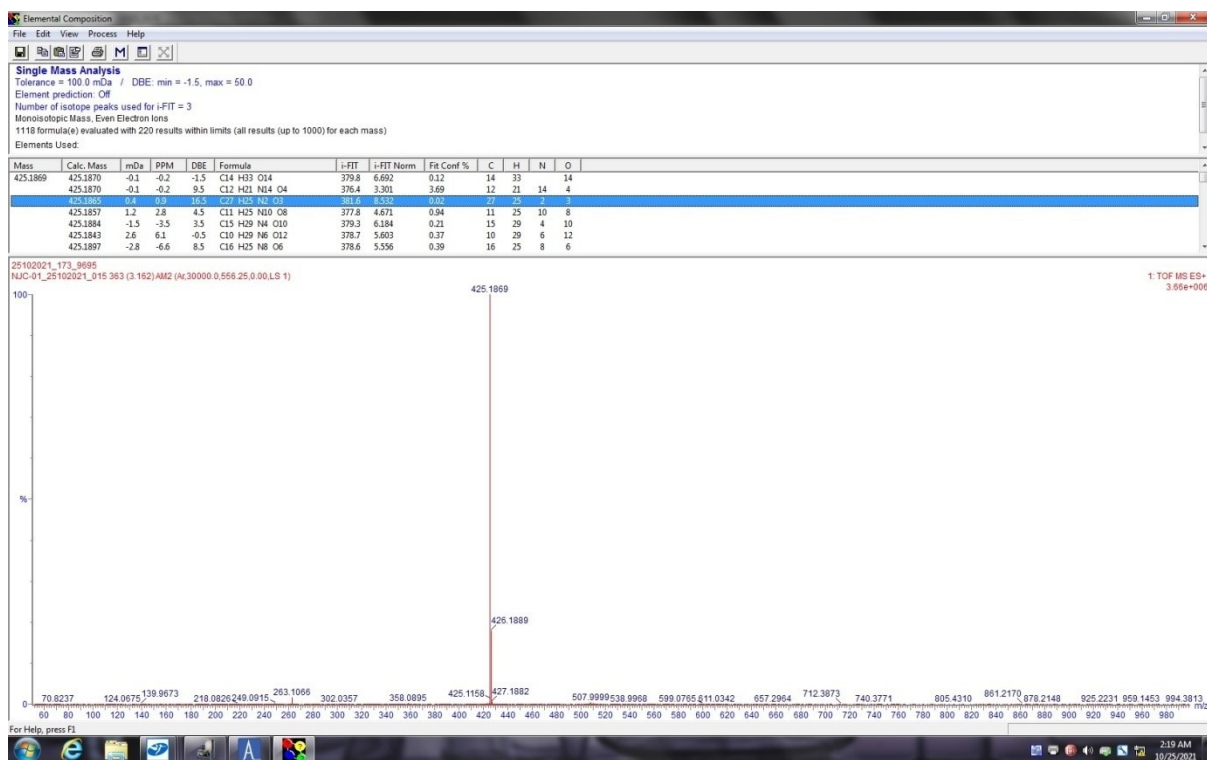

Figure S88: HRMS of Compound 5e



## 6. Docking Studies

The docking analysis was developed by Auto Dock Tools (ADT) (Sanner, 1999) version 1.5.6 and Auto dock version 4.2.5.1 programs; (Auto dock, Auto grid, Copyright-1989-2012) from the Scripps Research Institute <http://www.scripps.edu/mb/olson/doc/autodock>. All the synthesised Compounds were docked to target protein complex 4OHU with the protein molecule considered as a rigid body and the ligand as flexible. The search was carried out with the Lamarckian Genetic Algorithm; (Morris et al., 1998) populations of 150 individuals with a mutation rate of 0.02 evolved for 10 generations. Evaluation of the results was done by sorting the different complexes with respect to the predicted binding energy. A cluster analysis based on root mean square deviation values, with reference to the starting geometry, was subsequently performed, and the lowest energy conformation of the more populated cluster was considered as the most trustable solution. The output was exported to ADT and Biovia-Discovery Studio for visual inspection of the binding modes and interactions of the compounds with amino acid residues in the active sites.

The docking simulations in the active sites of ACP reductase InhA, is one of the essential enzymes involved in the type II fatty acid biosynthesis pathway of *M. tuberculosis* (PDB: 4OHU), was performed by the Auto Dock Tools (ADT) version 1.5.6 and Auto dock version 4.2.5.1 programmes.

### Compound 4a

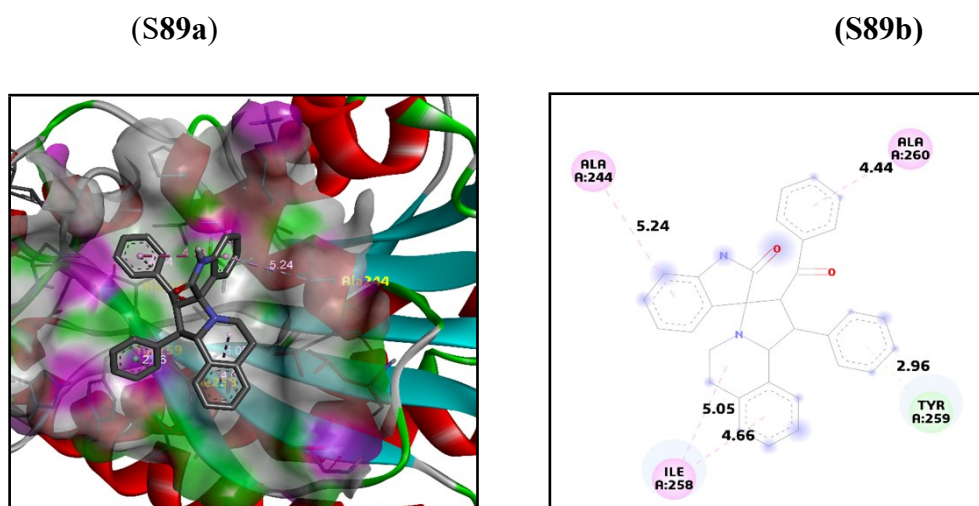

**Figure S89(a-b):** Molecular docking results of 4a with ACP reductase (4OHU): (S89a) 3D Docking pose of 4a with the receptor (S89b) 2D Docking pose of 4a with the receptor

## Compound 4b

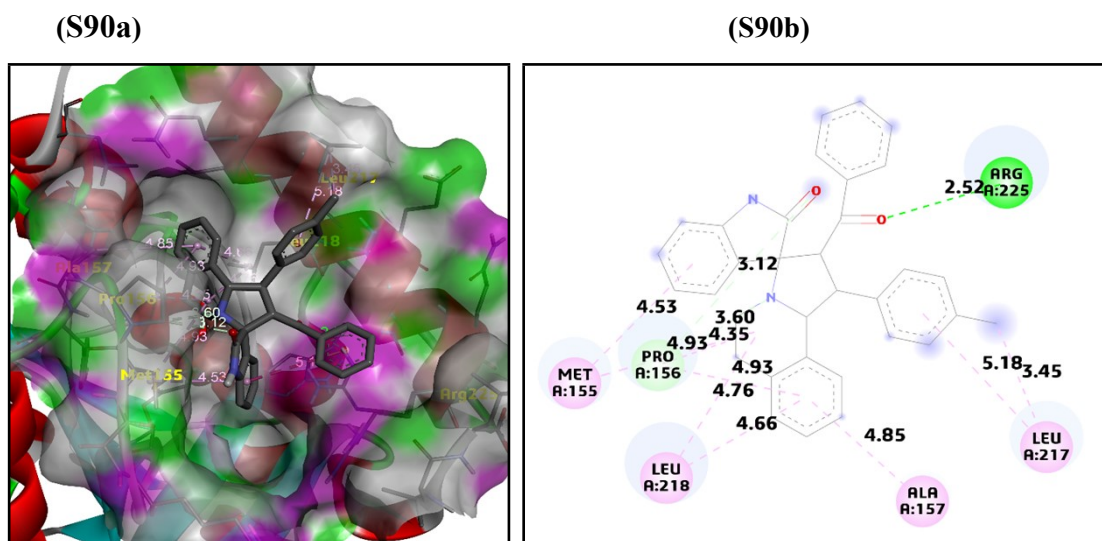

**Figure S90(a-b):** Molecular docking results of **4b** with ACP reductase (4OHU): (S90a) 3D Docking pose of **4b** with the receptor (S90b) 2D Docking pose of **4b** with the receptor

## Compound 4c

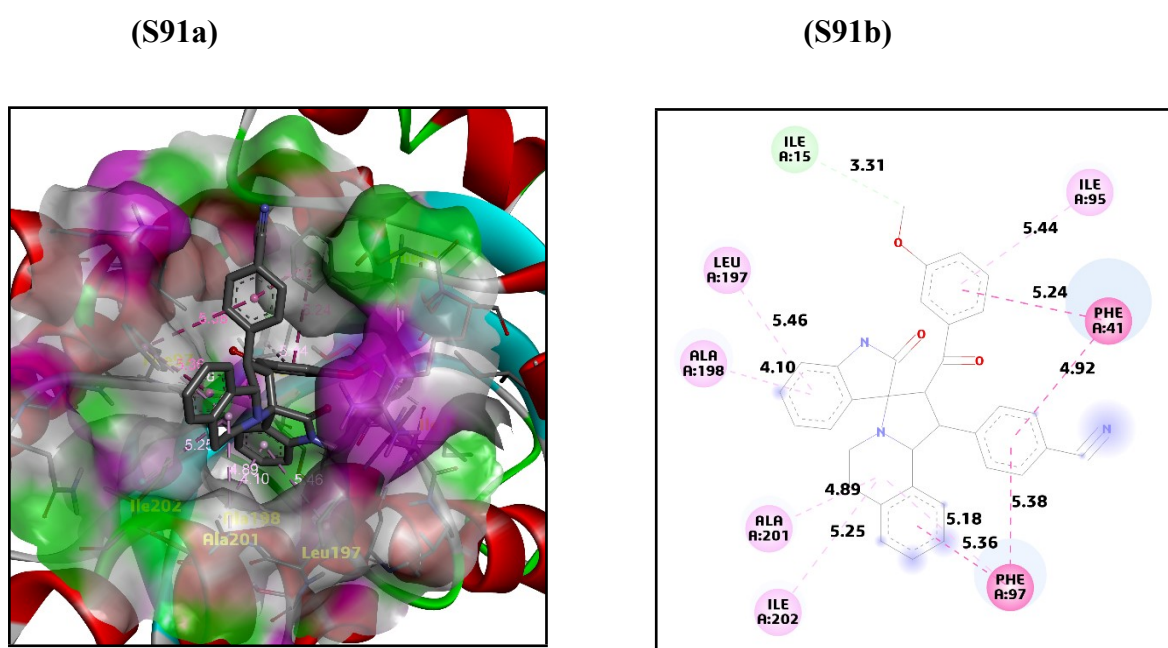

**Figure S91(a-b):** Molecular docking results of **4c** with ACP reductase (4OHU): (S91a) 3D Docking pose of **4c** with the receptor (S91b) 2D Docking pose of **4c** with the receptor

## Compound 4d

(S92a)

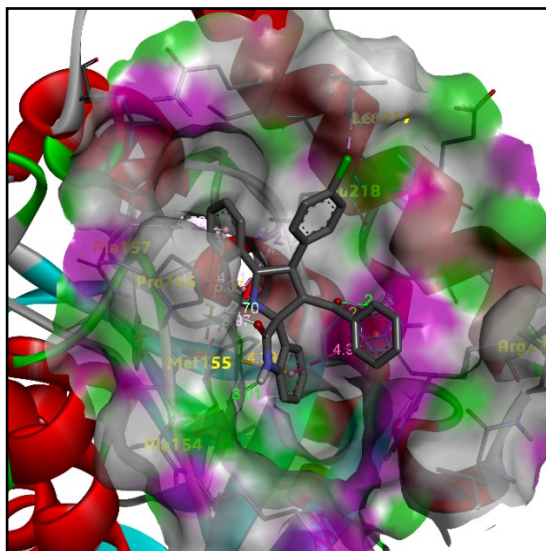

(S92b)

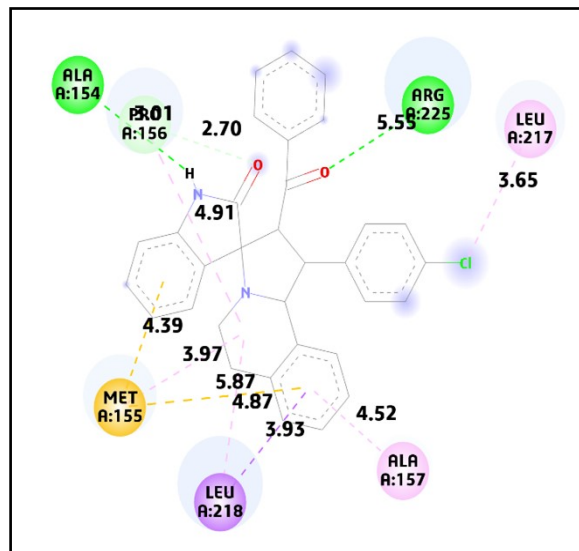

**Figure S92(a-b):** Molecular docking results of **4d** with ACP reductase (4OHU): (S92a) 3D Docking pose of **4d** with the receptor (S92b) 2D Docking pose of **4d** with the receptor

## Compound 4e

(S93a)

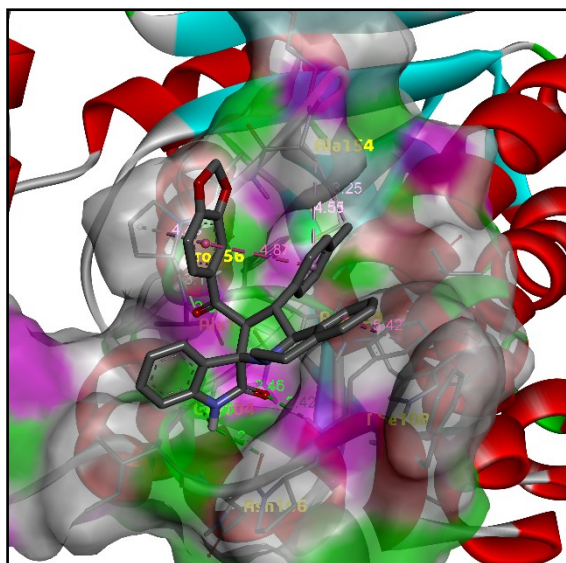

(S93b)

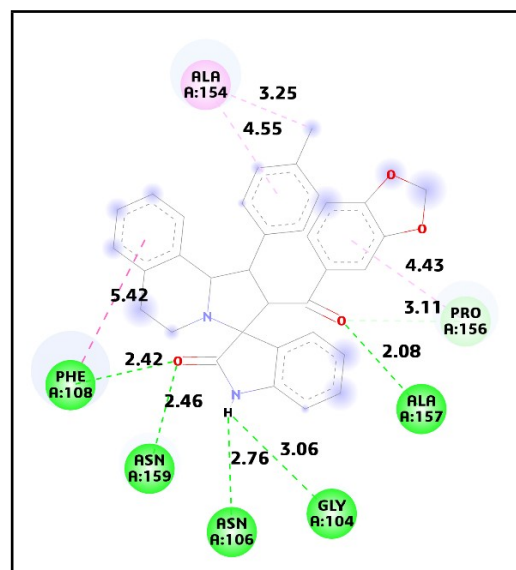

**Figure S93(a-b):** Molecular docking results of **4e** with ACP reductase (4OHU): (S93a) 3D Docking pose of **4e** with the receptor (S93b) 2D Docking pose of **4e** with the receptor



## Compound 4f

(S94a)

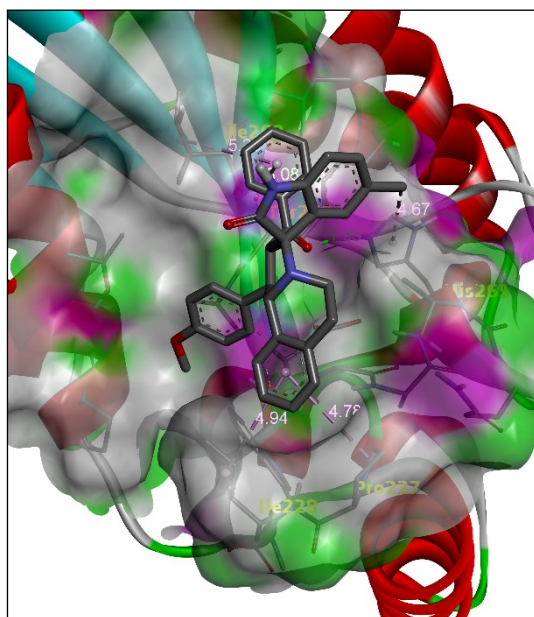

(S94b)

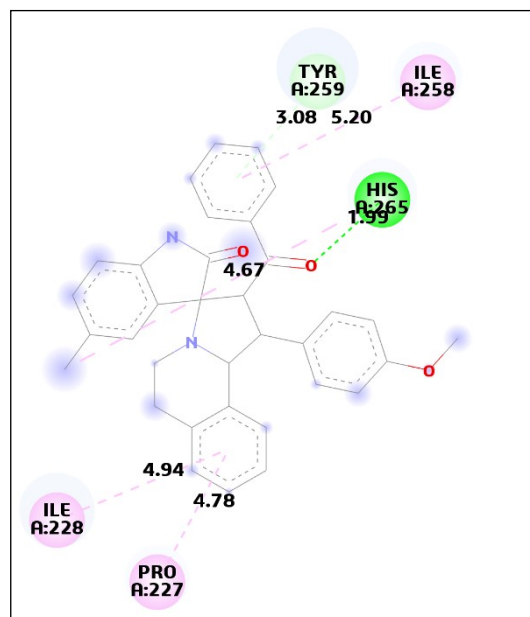

**Figure S94(a-b):** Molecular docking results of **4f** with ACP reductase (4OHU): (S94a) 3D Docking pose of **4f** with the receptor (S94b) 2D Docking pose of **4f** with the receptor

## Compound 4g

(S95a)

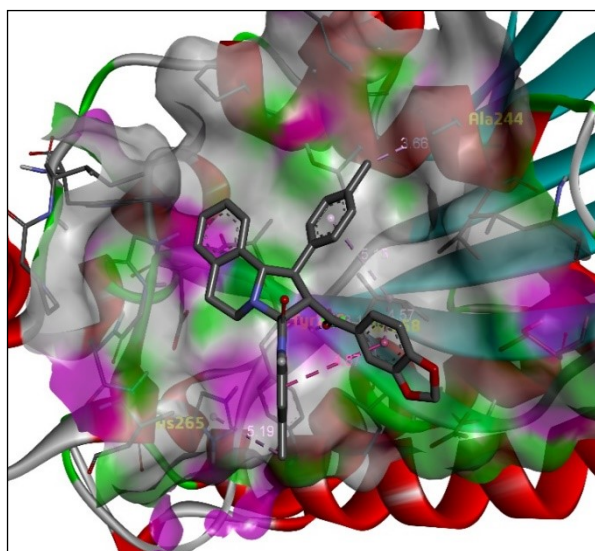

(S95b)

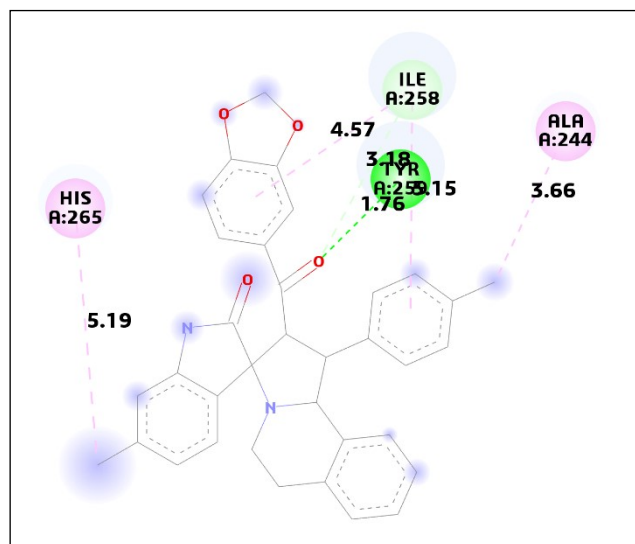

**Figure S95(a-b):** Molecular docking results of **4g** with ACP reductase (4OHU): (S95a) 3D Docking pose of **4g** with the receptor (S95b) 2D Docking pose of **4g** with the receptor

## Compound 4h

(S96a)

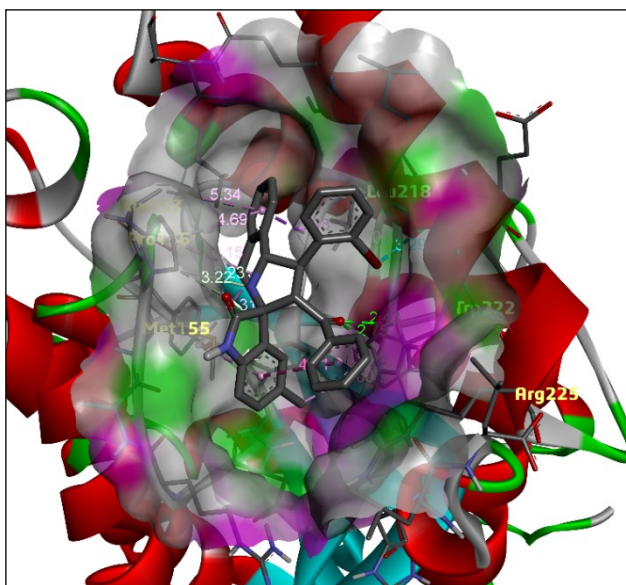

(S96b)

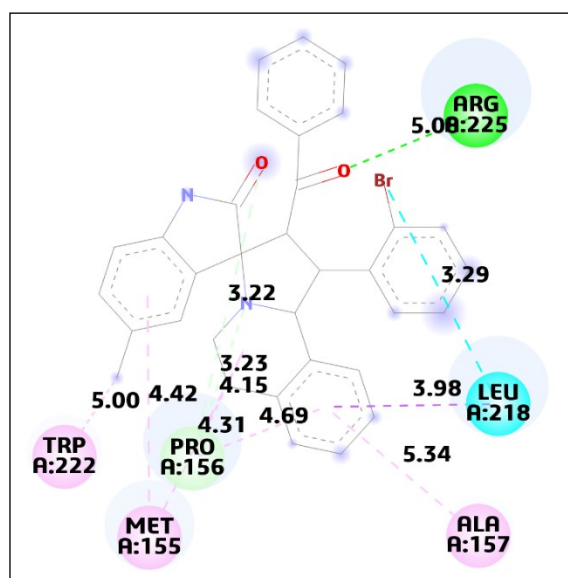

**Figure S96(a-b):** Molecular docking results of **4h** with ACP reductase (4OHU): (S96a) 3D Docking pose of **4h** with the receptor (S96b) 2D Docking pose of **4h** with the receptor

## Compound 4i

(S97a)

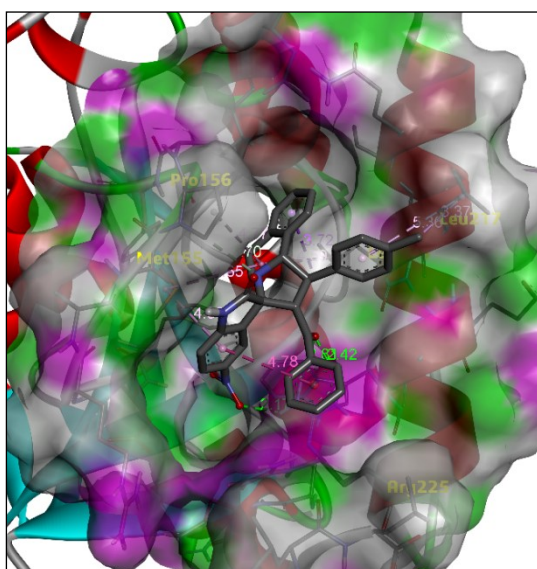

(S97b)

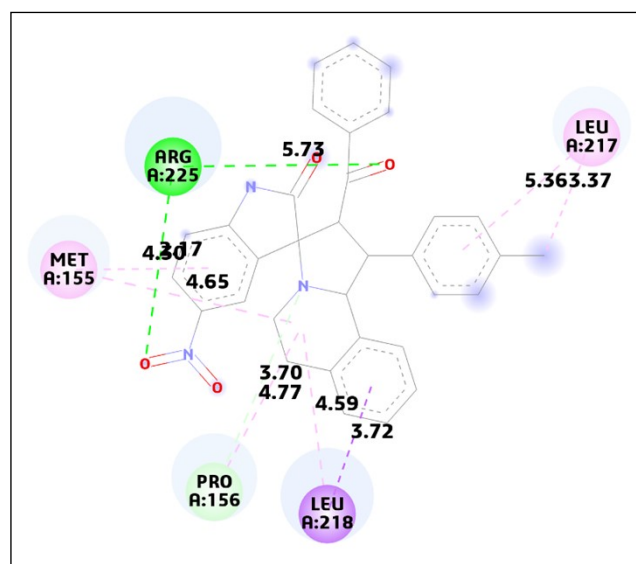

**Figure S97(a-b):** Molecular docking results of **4i** with ACP reductase (4OHU): (S97a) 3D Docking pose of **4i** with the receptor (S97b) 2D Docking pose of **4i** with the receptor

## Compound 4j

(S98a)

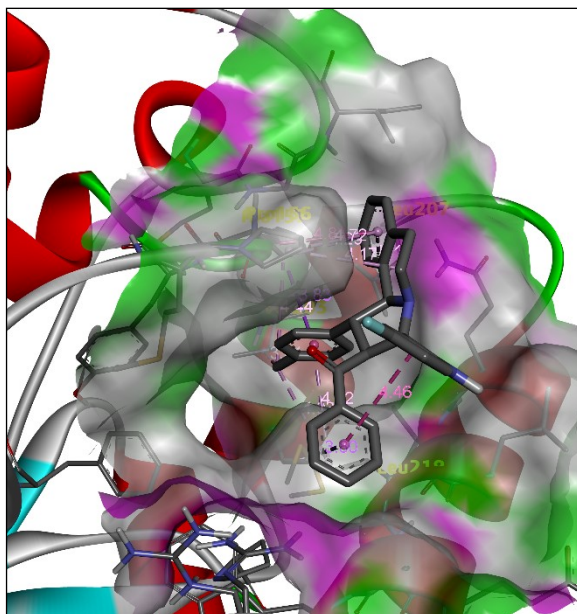

(S98b)

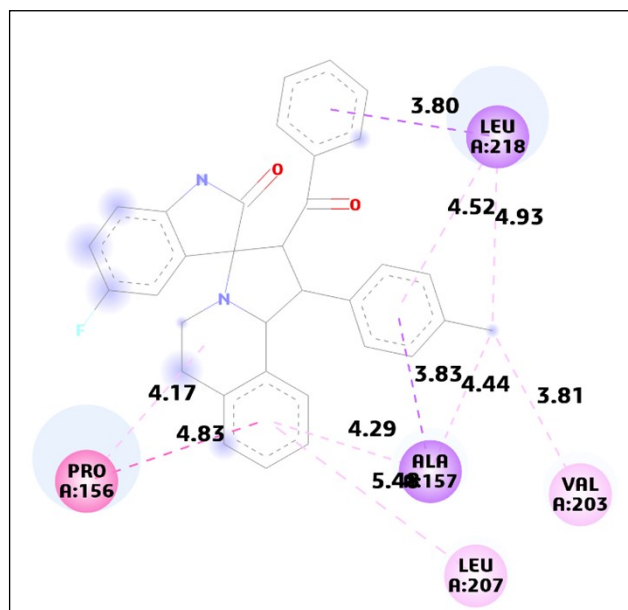

**Figure S98(a-b):** Molecular docking results of **4j** with ACP reductase (4OHU): (S98a) 3D Docking pose of **4j** with the receptor (S98b) 2D Docking pose of **4j** with the receptor

## Compound 4k

(S99a)

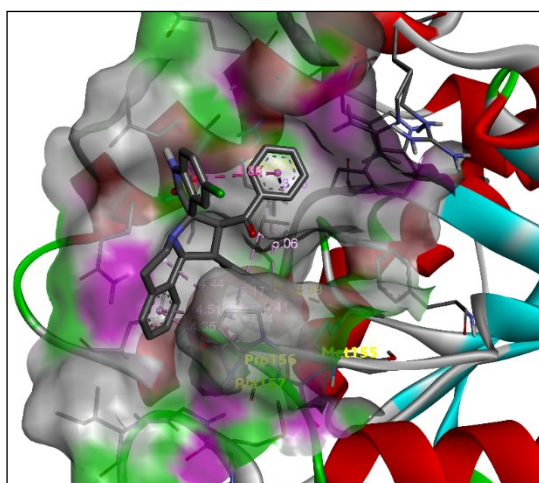

(S99b)

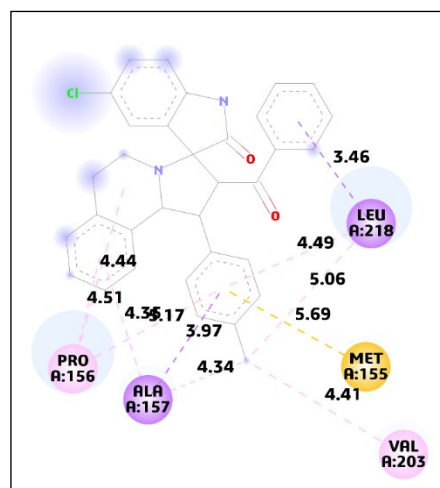

**Figure S99(a-b):** Molecular docking results of **4k** with ACP reductase (4OHU): (S99a) 3D Docking pose of **4k** with the receptor (S99b) 2D Docking pose of **4k** with the receptor





## Compound 4n

(S102a)

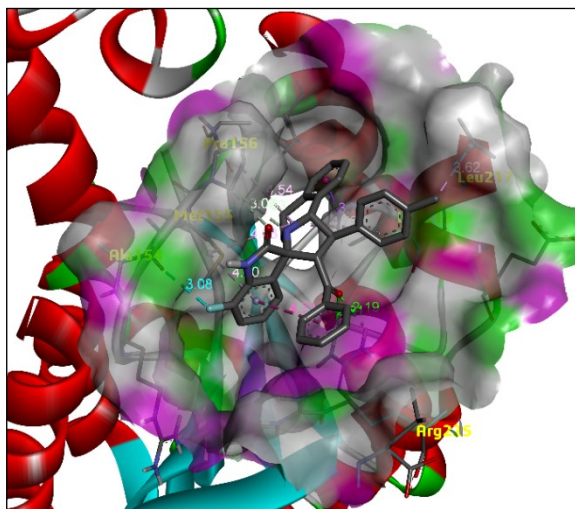

(S102b)

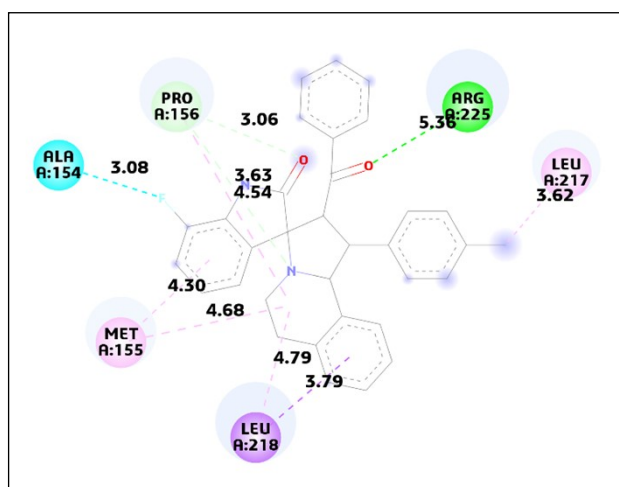

Figure S102(a-b): Molecular docking results of **4n** with ACP reductase (4OHU): (S102a) 3D Docking pose of **4n** with the receptor (S102b) 2D Docking pose of **4n** with the receptor

## Compound 4o

(S103a)

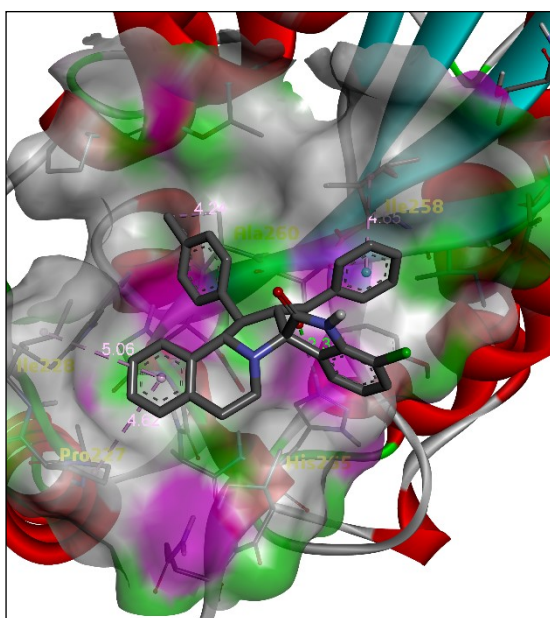

(S103b)

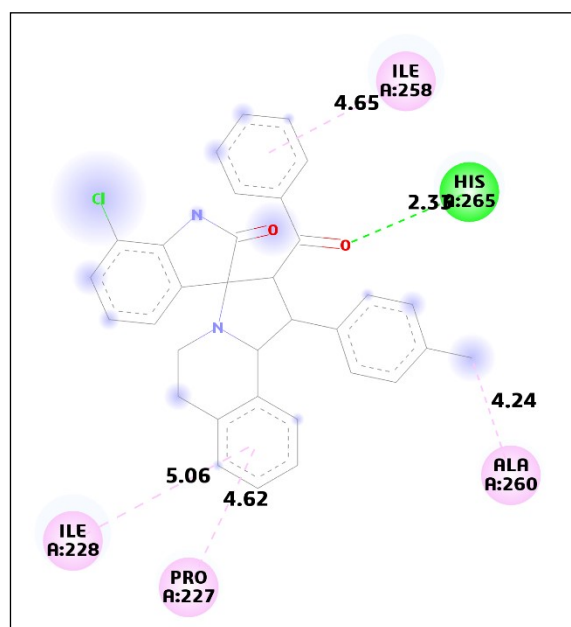

Figure S103(a-b): Molecular docking results of **4o** with ACP reductase (4OHU): (S103a) 3D Docking pose of **4o** with the receptor (S103b) 2D Docking pose of **4o** with the receptor



## Compound 4p

(S104a)

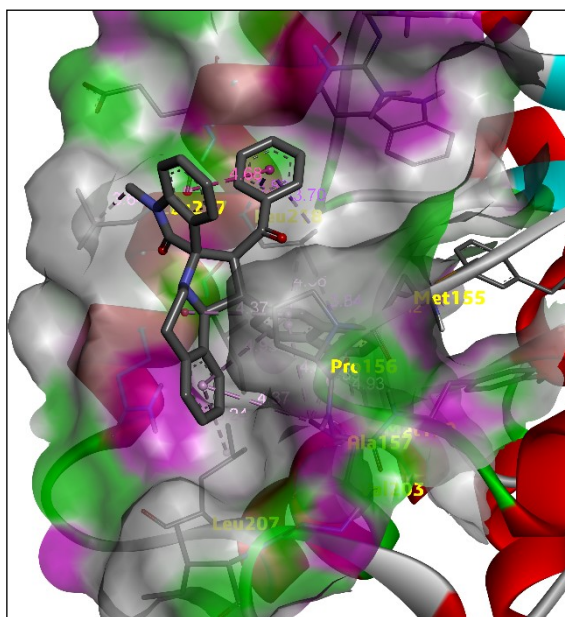

(S104b)

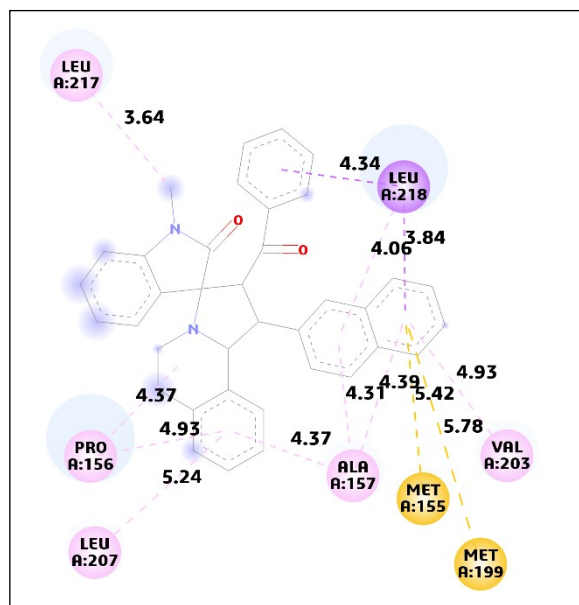

Figure S104(a-b): Molecular docking results of **4p** with ACP reductase (4OHU): (S104a) 3D Docking pose of **4p** with the receptor (S104b) 2D Docking pose of **4p** with the receptor

## Compound 4q

(S105a)

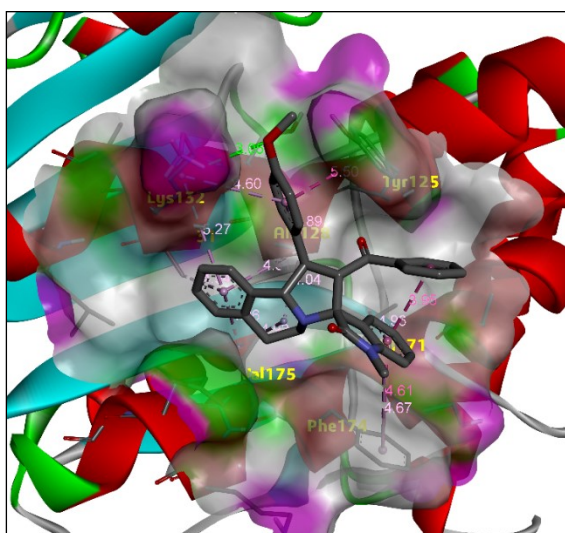

(S105b)

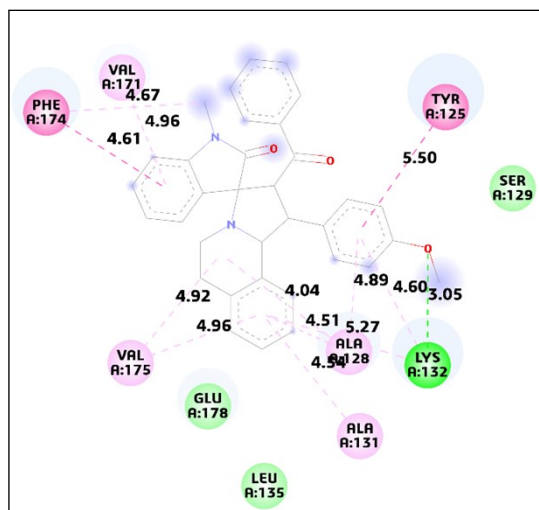

Figure S105(a-b): Molecular docking results of **4q** with ACP reductase (4OHU): (S105a) 3D Docking pose of **4q** with the receptor (S105b) 2D Docking pose of **4q** with the receptor

## Compound 4r

(S106a)

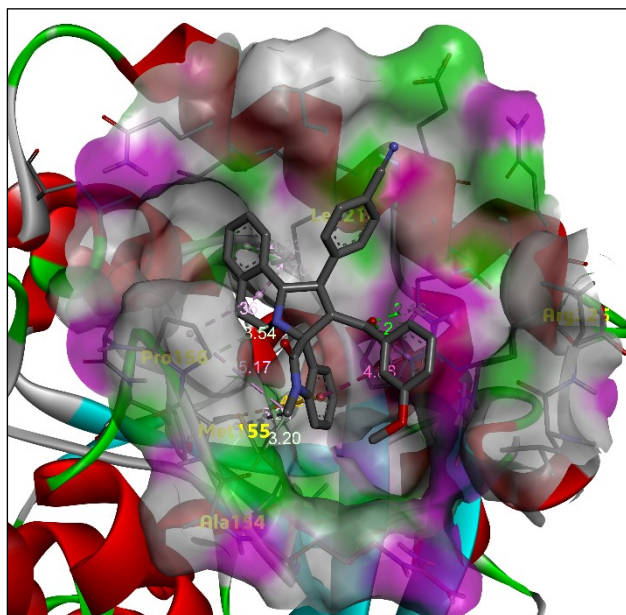

(S106b)

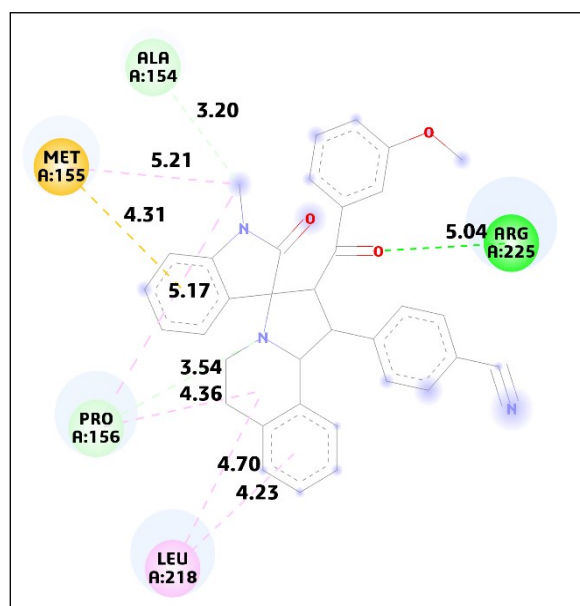

Figure S106(a-b): Molecular docking results of **4r** with ACP reductase (4OHU): (S106a) 3D Docking pose of **4r** with the receptor (S106b) 2D Docking pose of **4r** with the receptor

## Compound 4s

(S107a)

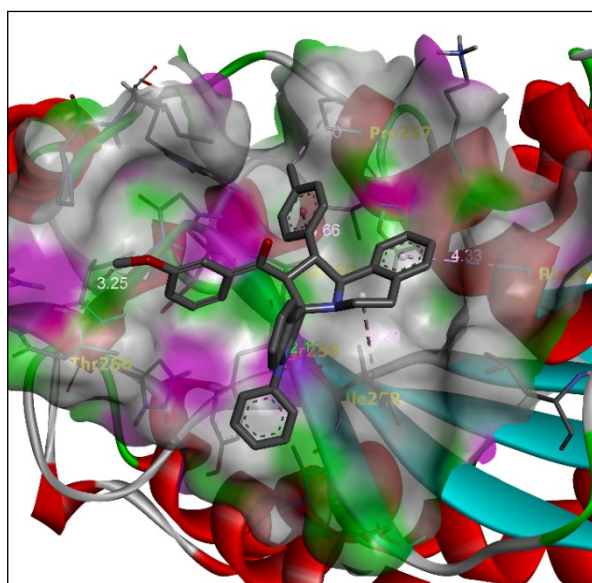

(S107b)

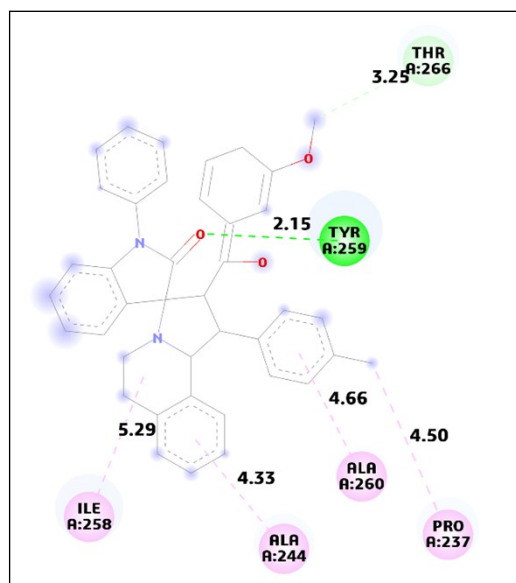

Figure S107(a-b): Molecular docking results of **4s** with ACP reductase (4OHU): (S107a) 3D Docking pose of **4s** with the receptor (S107b) 2D Docking pose of **4s** with the receptor

## Compound 4t

(S108a)

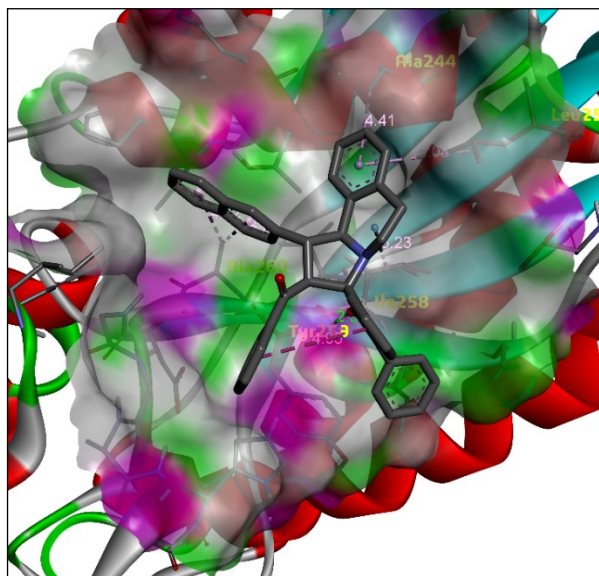

(S108b)

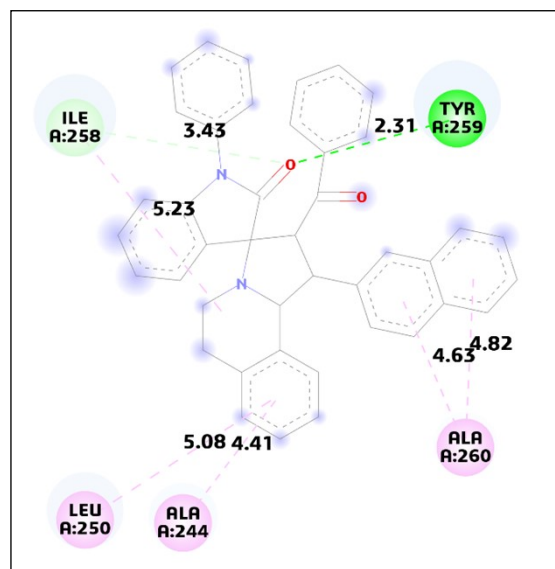

Figure S108(a-b): Molecular docking results of **4t** with ACP reductase (4OHU): (S108a) 3D Docking pose of **4t** with the receptor (S108b) 2D Docking pose of **4t** with the receptor

## Compound 4u

(S109a)

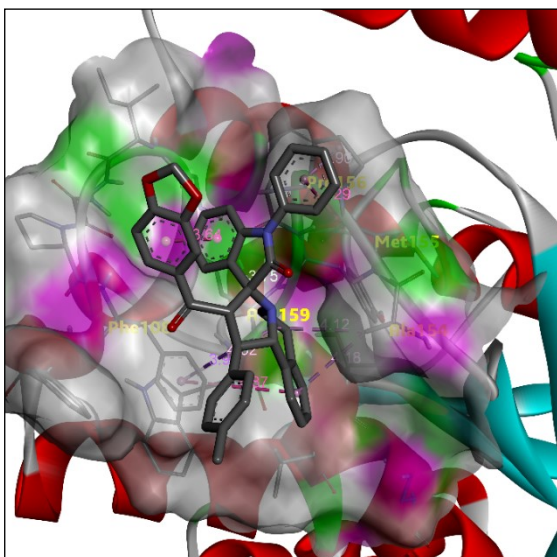

(S109b)

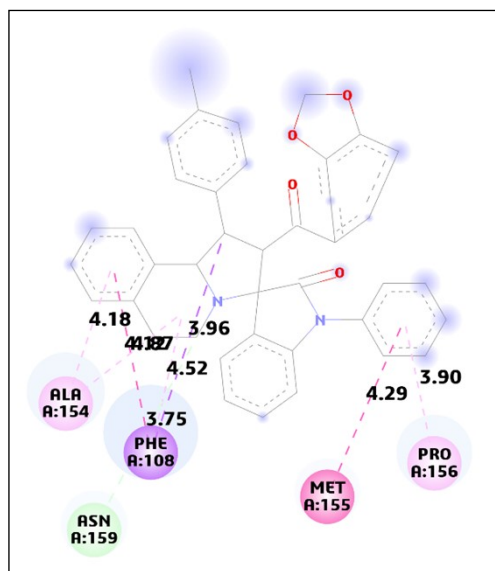

Figure S109(a-b): Molecular docking results of **4u** with ACP reductase (4OHU): (S109a) 3D Docking pose of **4u** with the receptor (S109b) 2D Docking pose of **4u** with the receptor



## Compound 4v

(S110a)

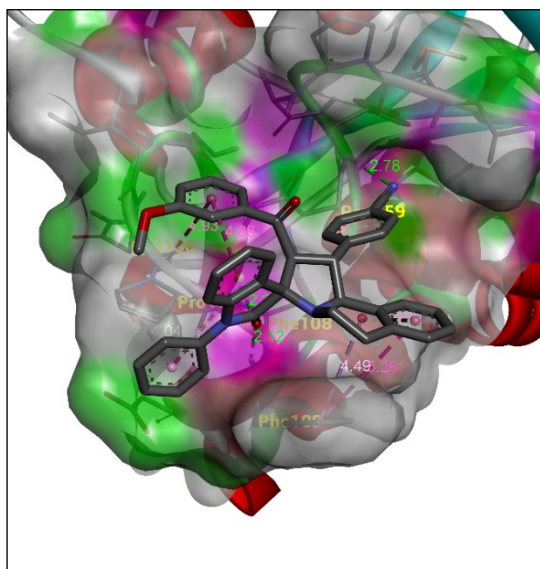

(S110b)

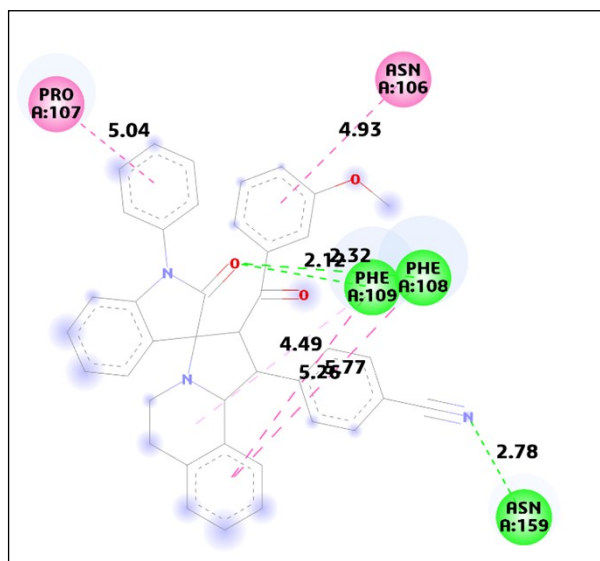

Figure S110(a-b): Molecular docking results of **4v** with ACP reductase (4OHU): (S110a) 3D Docking pose of **4v** with the receptor (S110b) 2D Docking pose of **4v** with the receptor

## Compound 4w

(S111a)

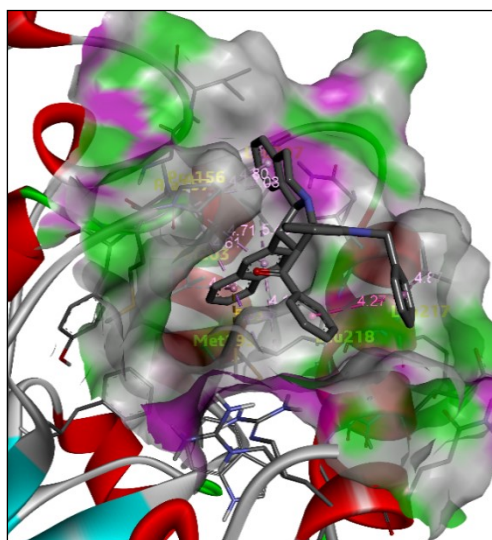

(S111b)

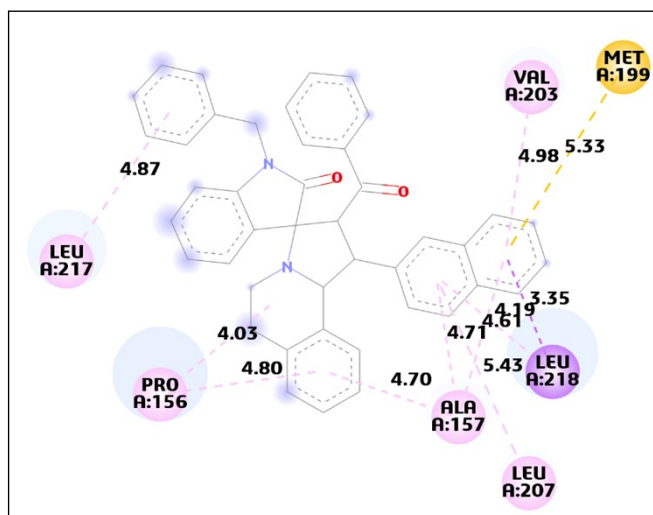

Figure S111(a-b): Molecular docking results of **4w** with ACP reductase (4OHU): (S111a) 3D Docking pose of **4w** with the receptor (S111b) 2D Docking pose of **4w** with the receptor

## Compound 4x

(S112a)

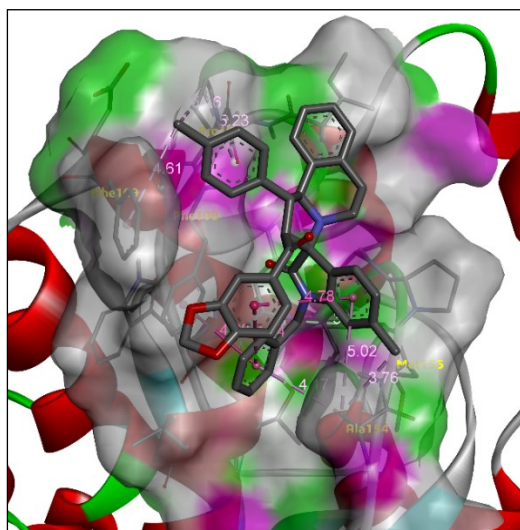

(S112b)

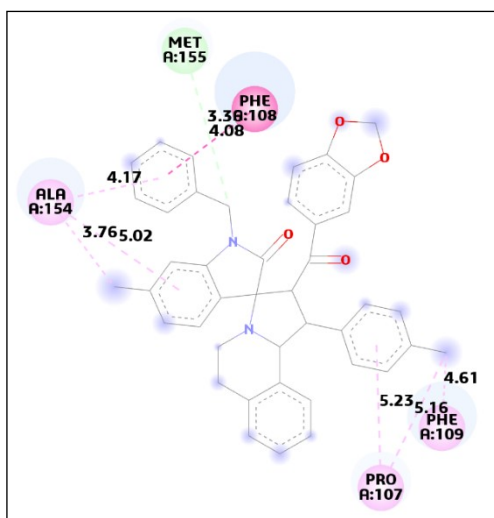

Figure S112(a-b): Molecular docking results of **4x** with ACP reductase (4OHU): (S112a) 3D Docking pose of **4x** with the receptor (S112b) 2D Docking pose of **4x** with the receptor

## Compound 4y

(S113a)

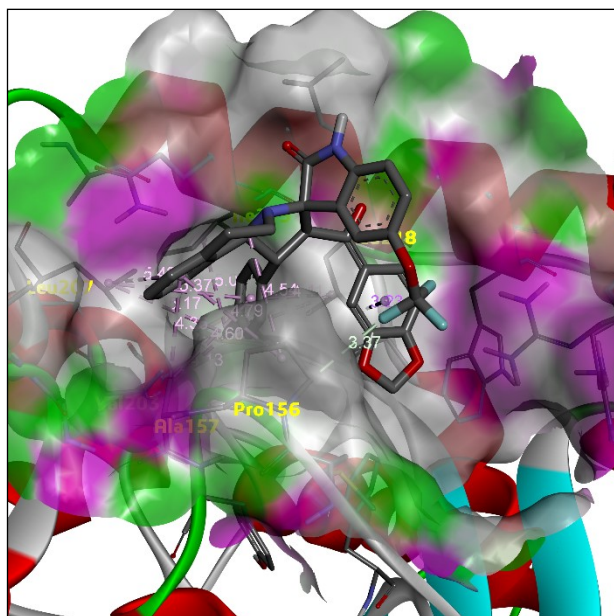

(S113b)

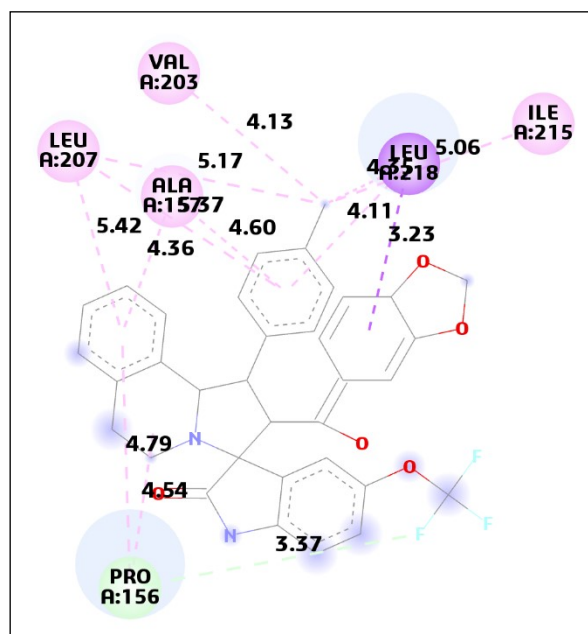

Figure S113(a-b): Molecular docking results of **4y** with ACP reductase (4OHU): (S113a) 3D Docking pose of **4y** with the receptor (S113b) 2D Docking pose of **4y** with the receptor

## Compound 5b

(S114a)

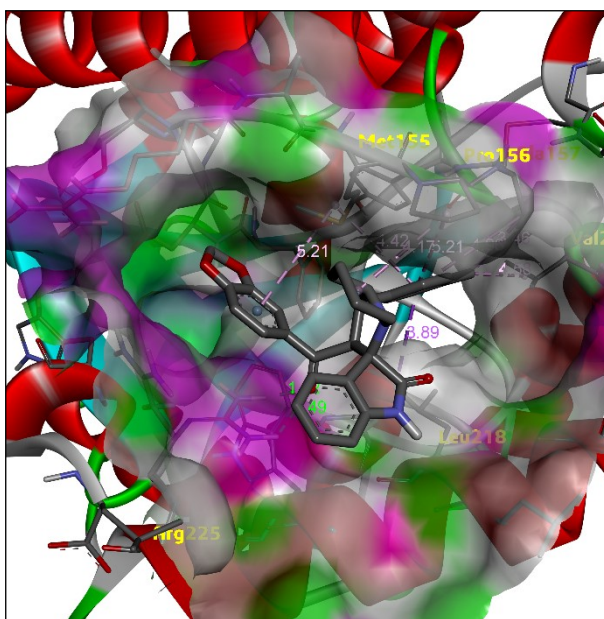

(S114b)

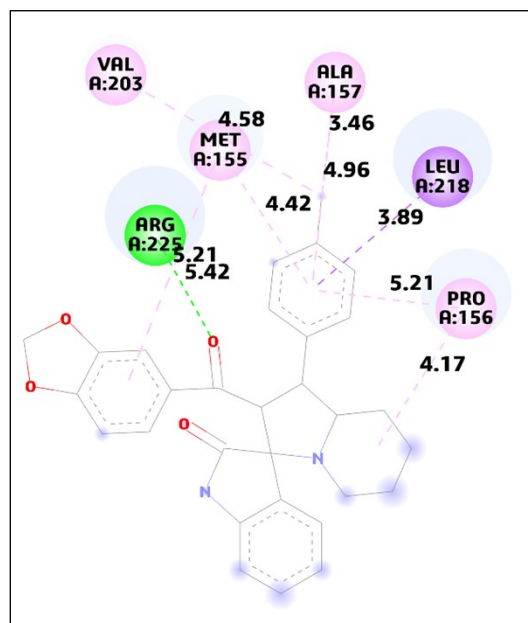

Figure S114(a-b): Molecular docking results of **5b** with ACP reductase (4OHU): (S114a) 3D Docking pose of **5b** with the receptor (S114b) 2D Docking pose of **5b** with the receptor

## Compound 5c

(S115a)

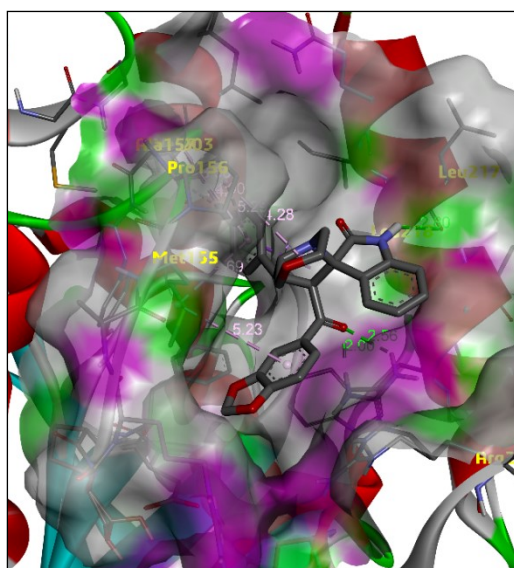

(S115b)

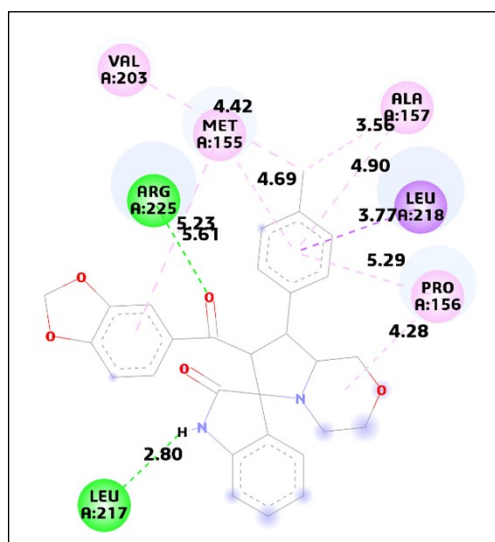

Figure S115(a-b): Molecular docking results of **5c** with ACP reductase (4OHU): (S115a) 3D Docking pose of **5c** with the receptor (S115b) 2D Docking pose of **5c** with the receptor



## Compound 5d

(S116a)

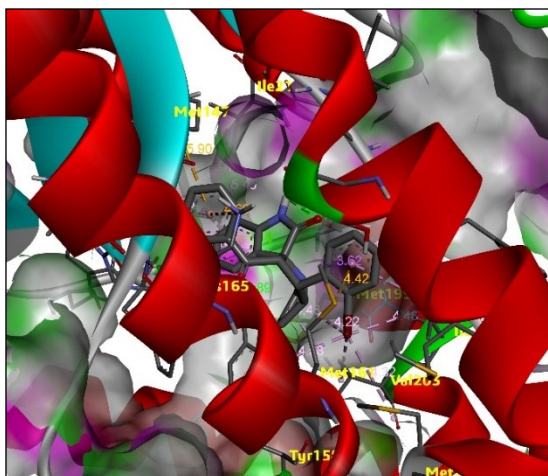

(S116b)

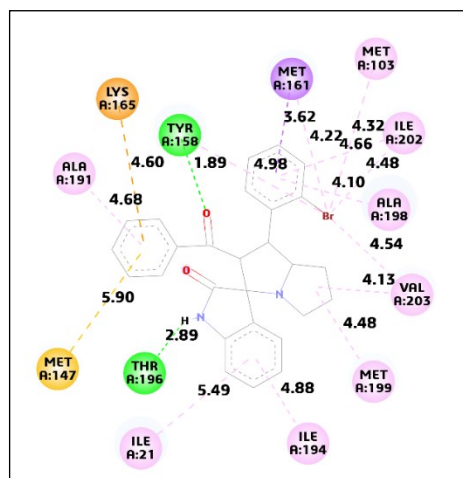

Figure S116(a-b): Molecular docking results of **5d** with ACP reductase (4OHU): (S116a) 3D Docking pose of **5d** with the receptor (S116b) 2D Docking pose of **5d** with the receptor

## Validation (Rifampicin)

(S117a)

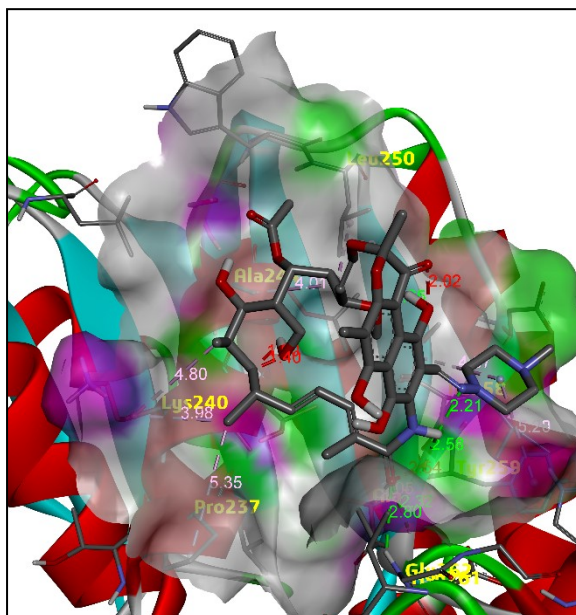

(S117b)

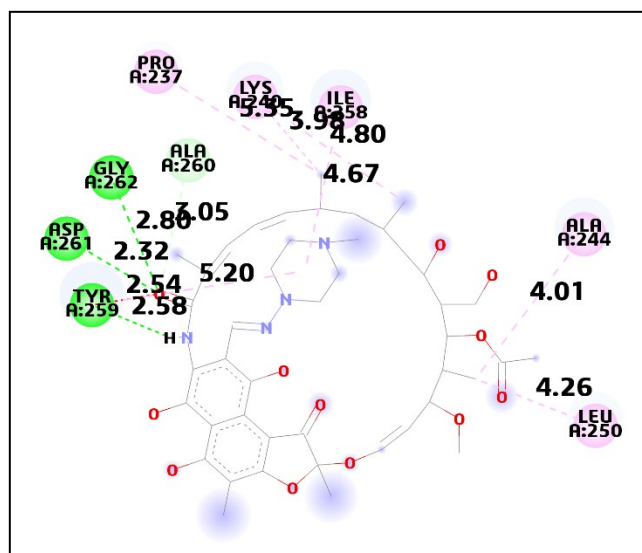

Figure S117(a-b): Molecular docking results of **Rifampicin** with ACP reductase (4OHU): (S117a) 3D Docking pose of the **drug** with the receptor (S117b) 2D Docking pose of **drug** with the receptor
